# Supplementary material
Source: PubMed Central journal article supplement (PMC7703681)

## Supporting Information.

### **Pyrazol-1-yl-Propanamides as Selective Androgen Receptor Degraders (SARD) and Pan-Antagonists for the Treatment of Enzalutamide-Resistant Prostate Cancer**

*Yali He,<sup>1</sup> Dong-Jin Hwang,<sup>1</sup> Suriyan Ponnusamy,<sup>2</sup> Thirumagal Thiyagarajan,<sup>2</sup> Michael*

*L. Mohler,<sup>1</sup> Ramesh Narayanan,<sup>2</sup> Duane D. Miller<sup>1\*</sup>*

#### Contents:

|                                      |                  |
|--------------------------------------|------------------|
| Figure S1. PK method in rats for 21a | pages S2         |
| HPLC purity and HRMS                 | pages S3 to S82. |

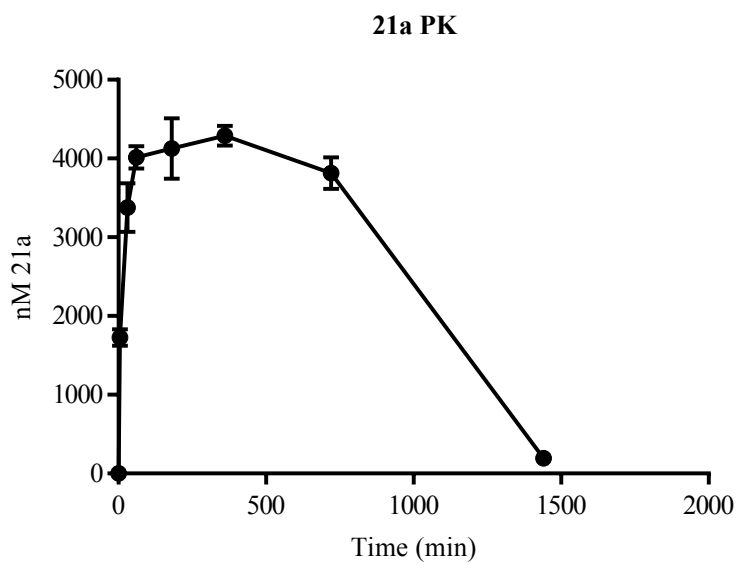

**Figure S1. PK method in rats for 21a:** Sprague Dawley rats were dosed with 30 mg/kg **21a** and blood was collected from jugular vein at 5 min, 30 min, 1 h, 3h, 360 h, 12 h, and 24 h post dosing. Serum was separated and analyzed using LC/MS-MS for the amount of **21a**.

YH-II-059\_20191007\_1

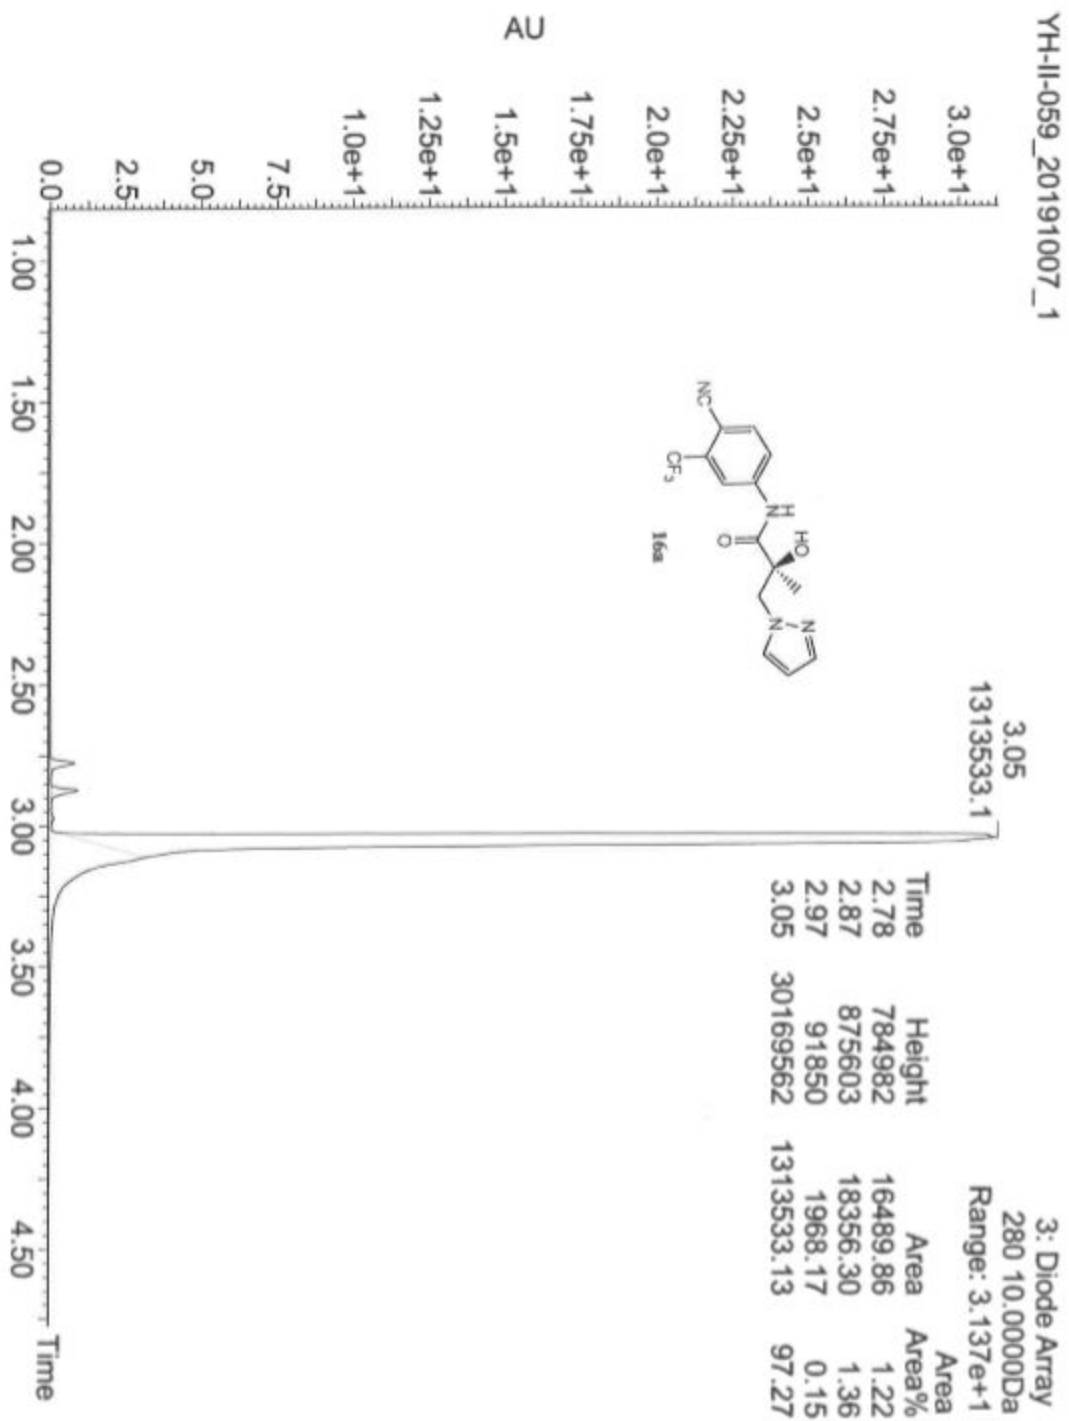

YH-II-059\_20191007\_1 249 (3.084)

339.1041

1: TOF MS ES+  
1.07e7

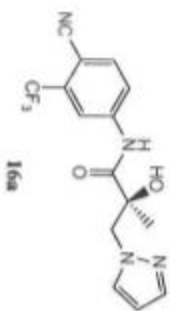

361.0862

362.0894

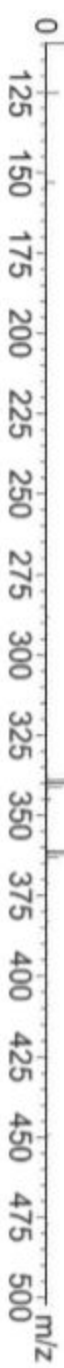

YH-II-051\_20191007\_3

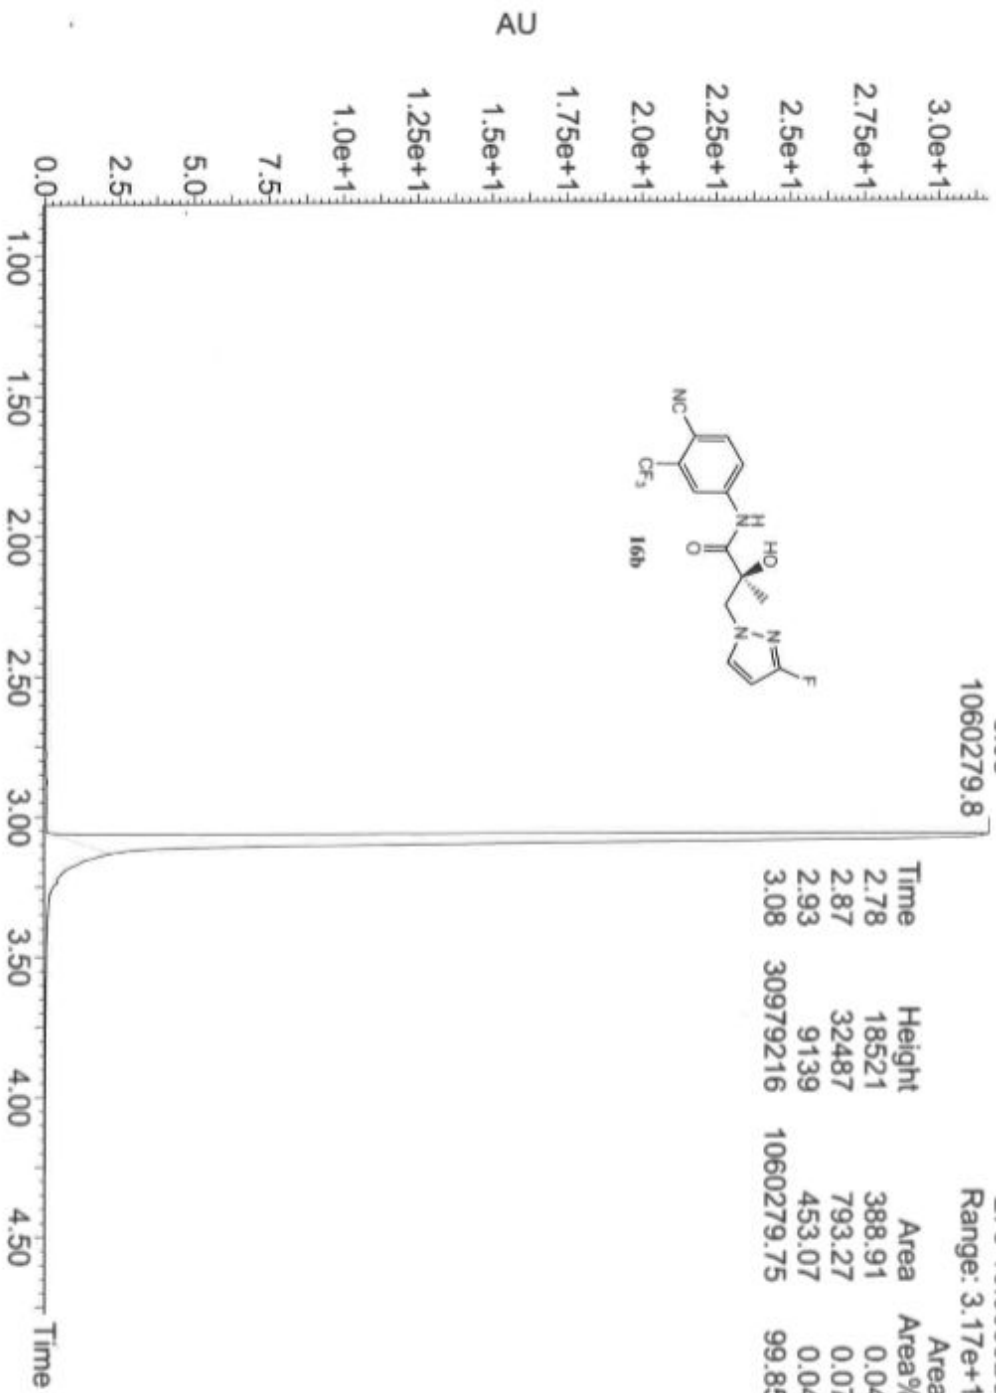

YH-II-051\_20191007\_3 253 (3.129)

1: TOF MS ES+  
5.43e6

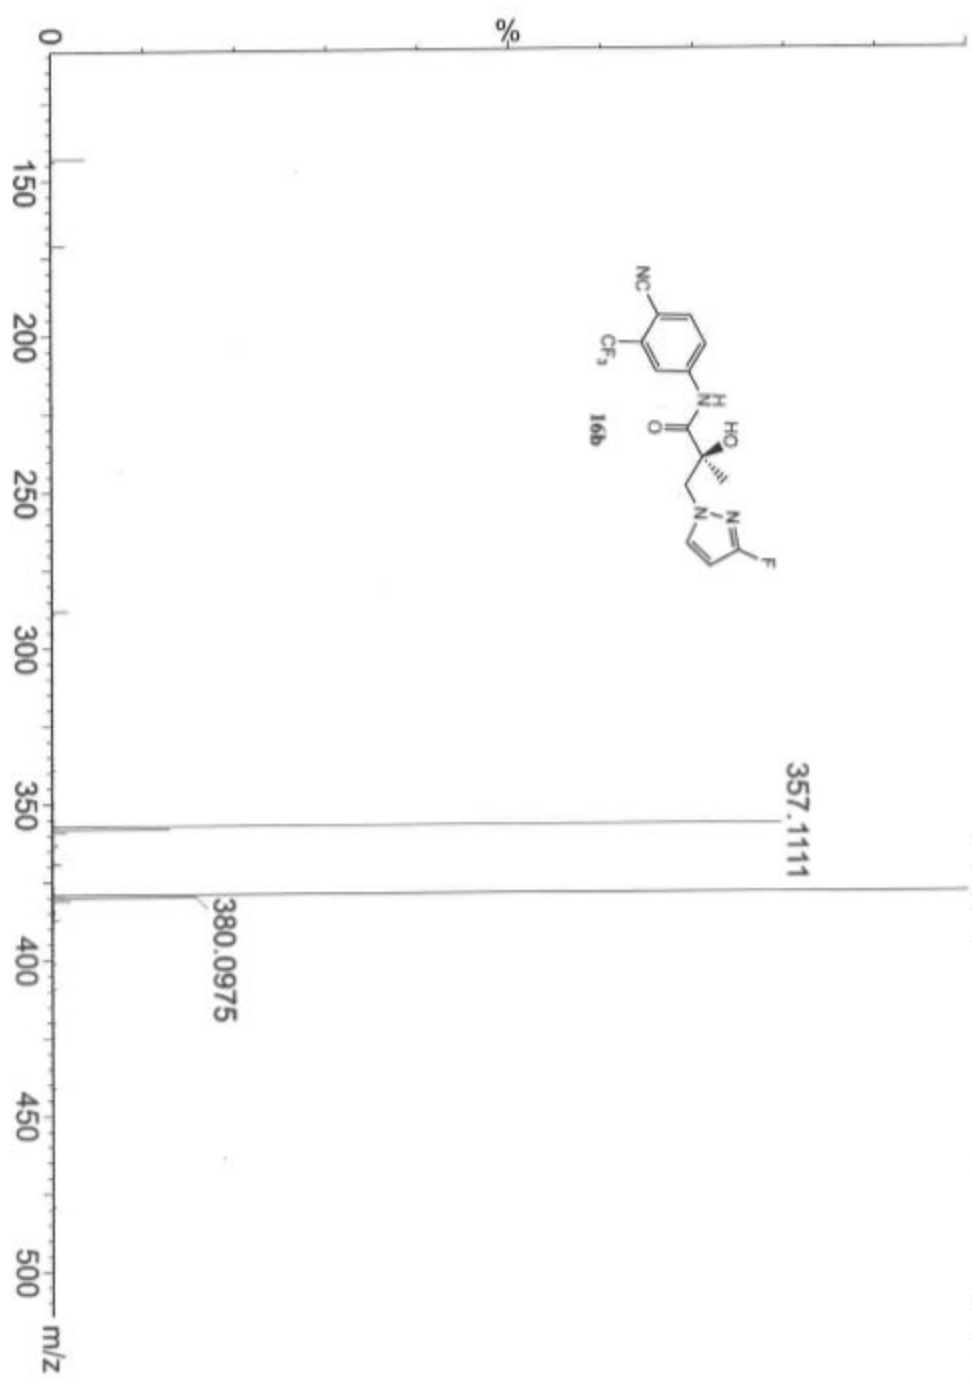

YH-II-223\_20191007\_4

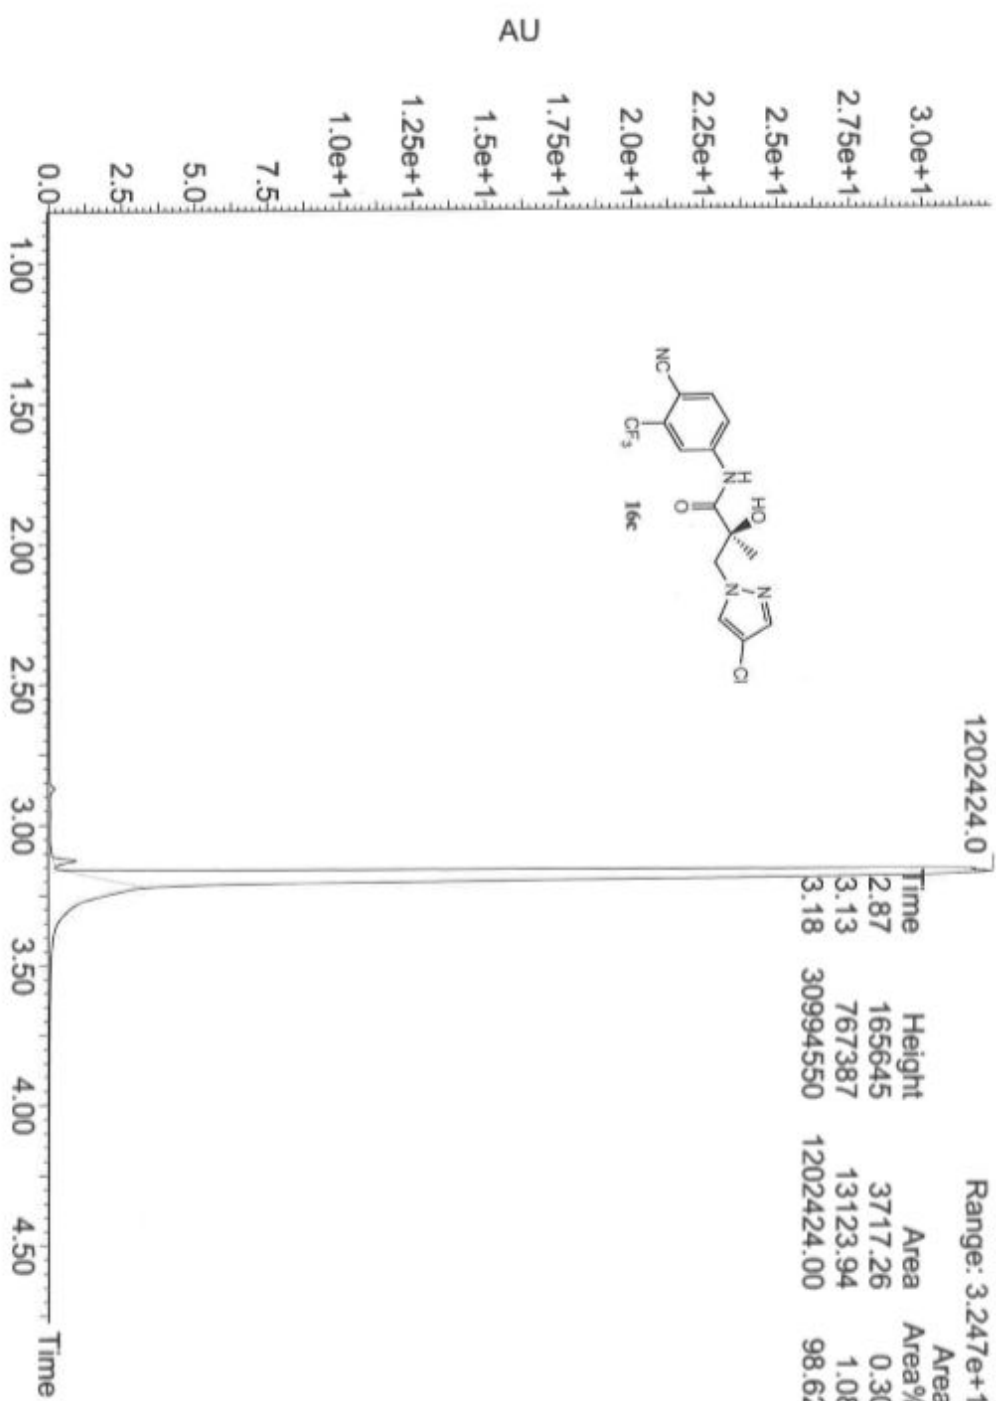

YH-II-223\_20191007\_4 264 (3.224)

1: TOF MS ES+  
1.16e6

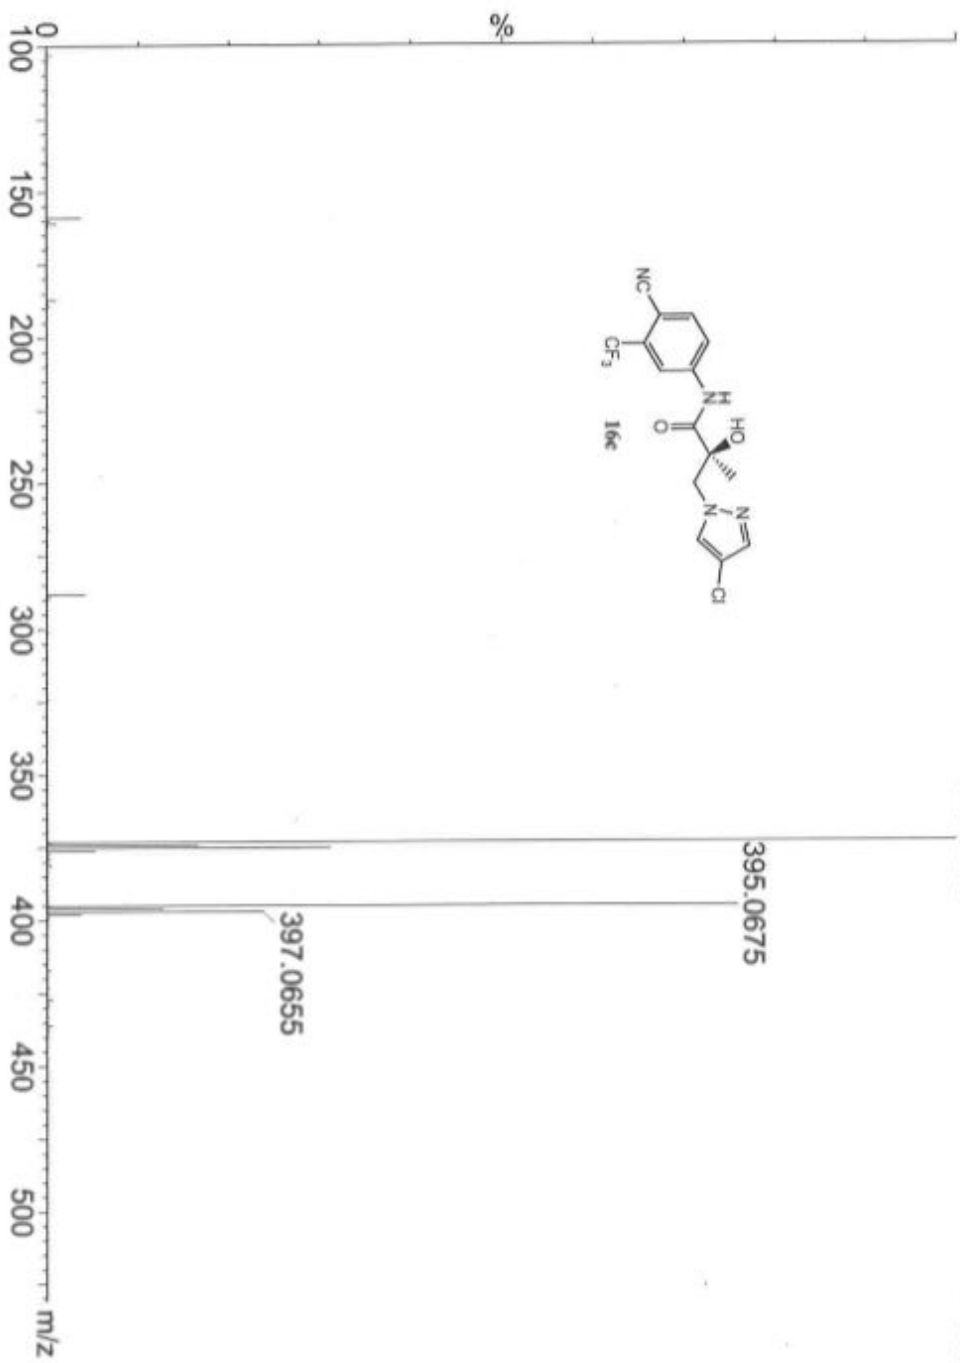



YH-II-227\_20191007\_5

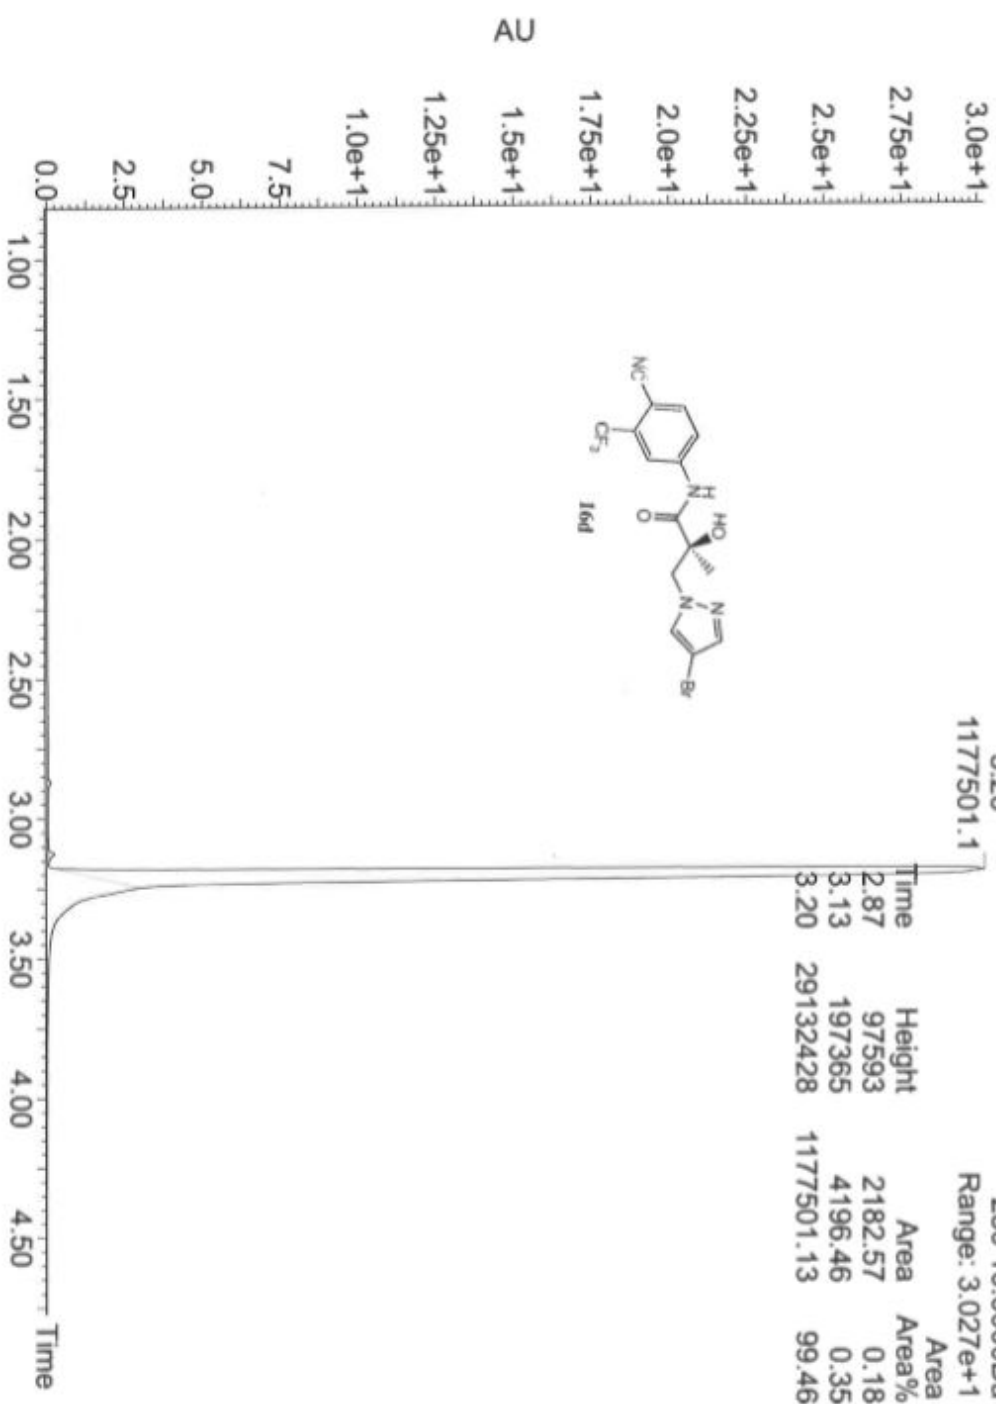

YH-II-227\_20191007\_5 265 (3.232)

1: TOF MS ES+  
7.48e5

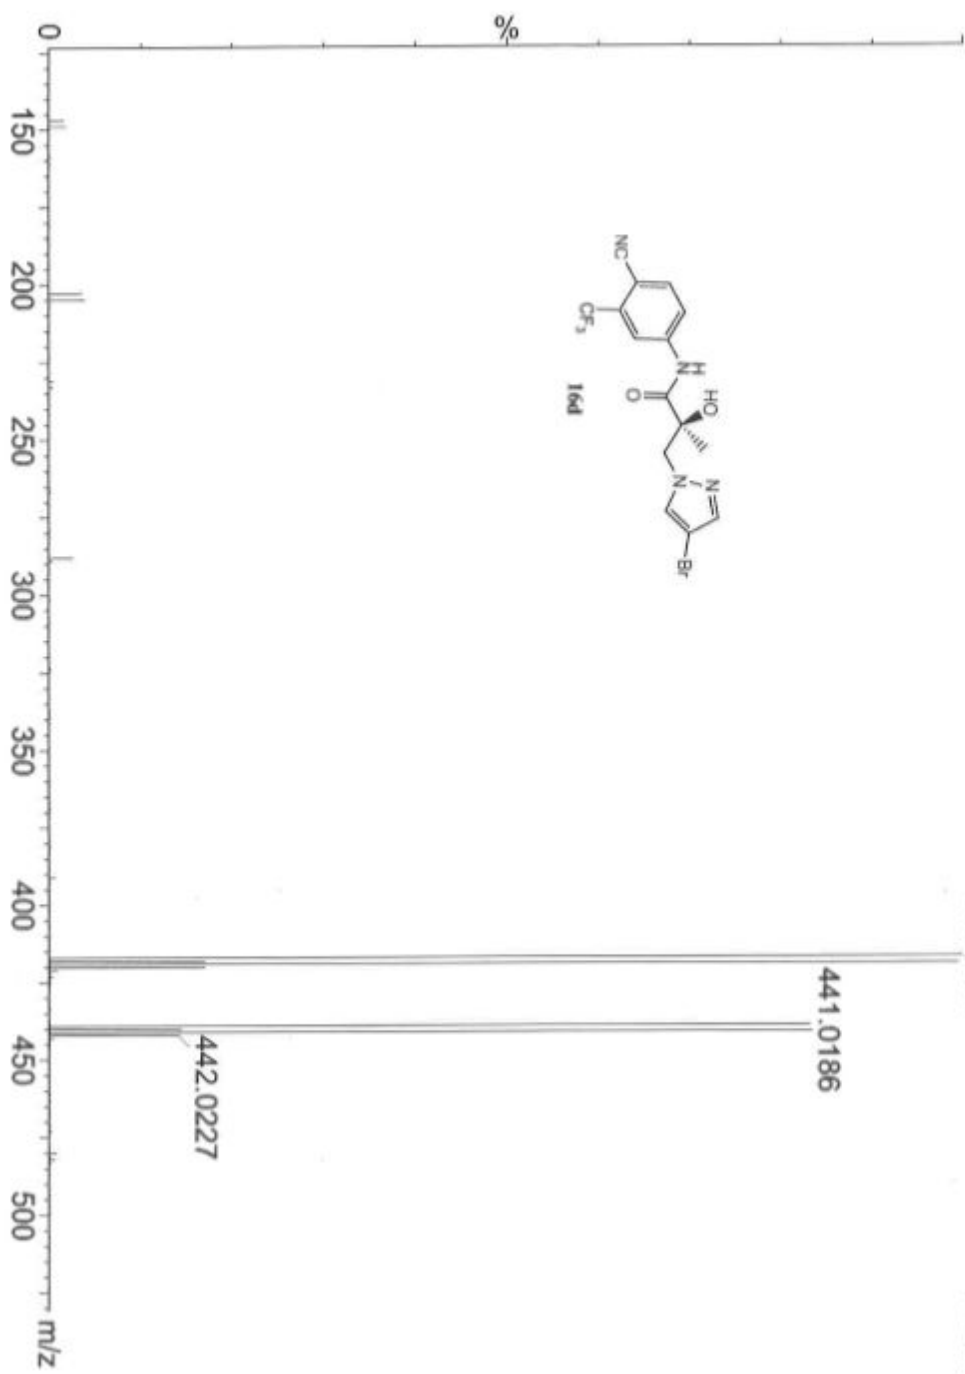

YH-II-211\_20191007\_6

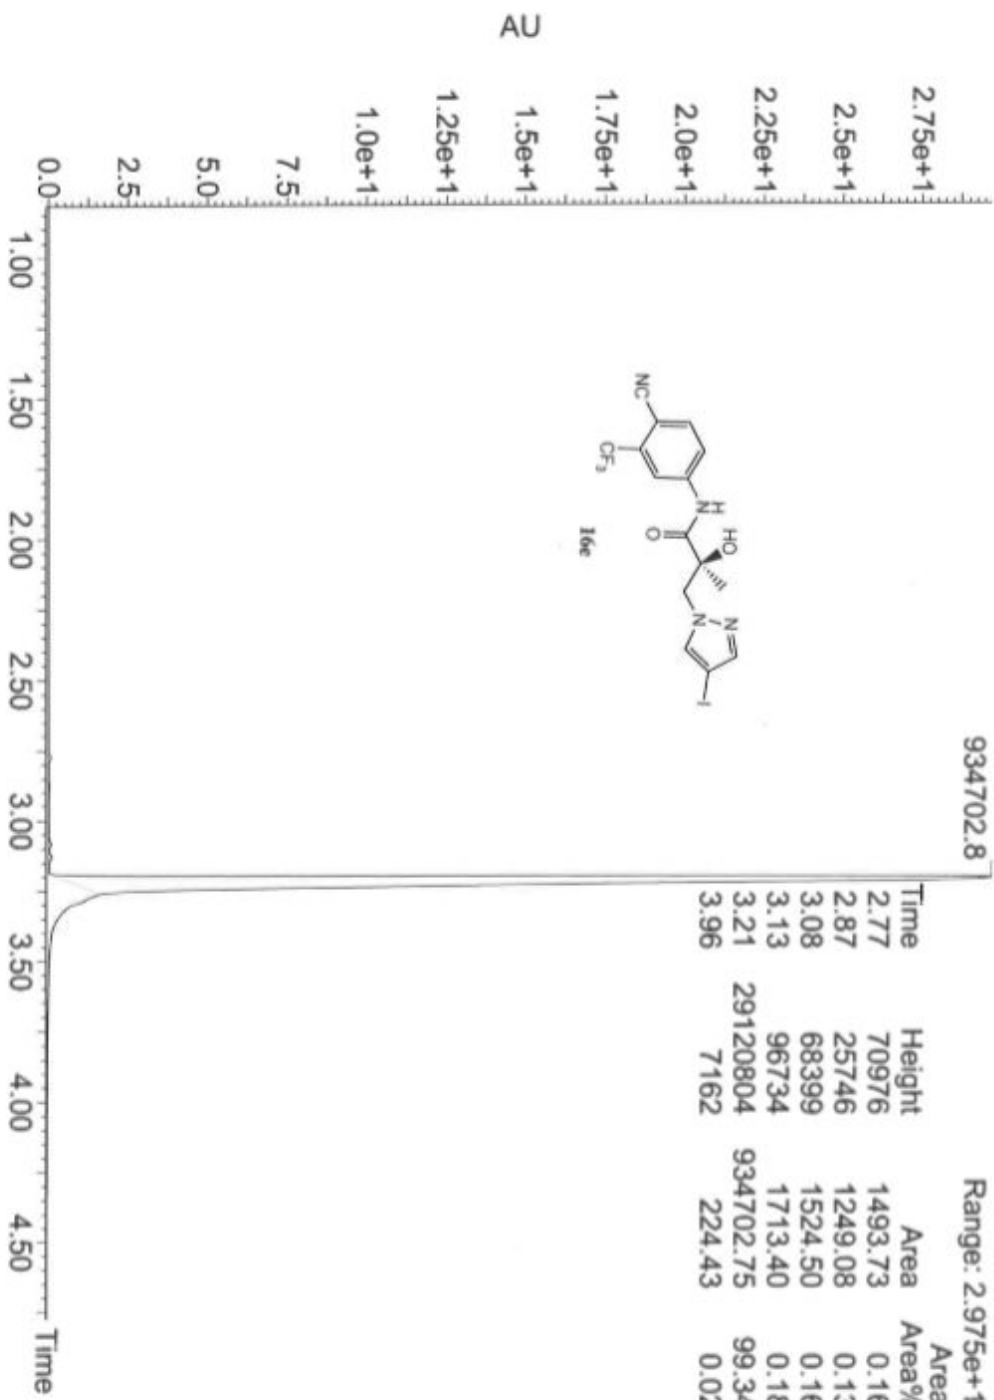

YH-II-211\_20191007\_6 268 (3.258)

1: TOF MS ES+  
465.0276  
1.44e6

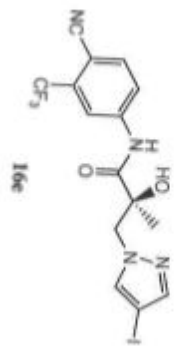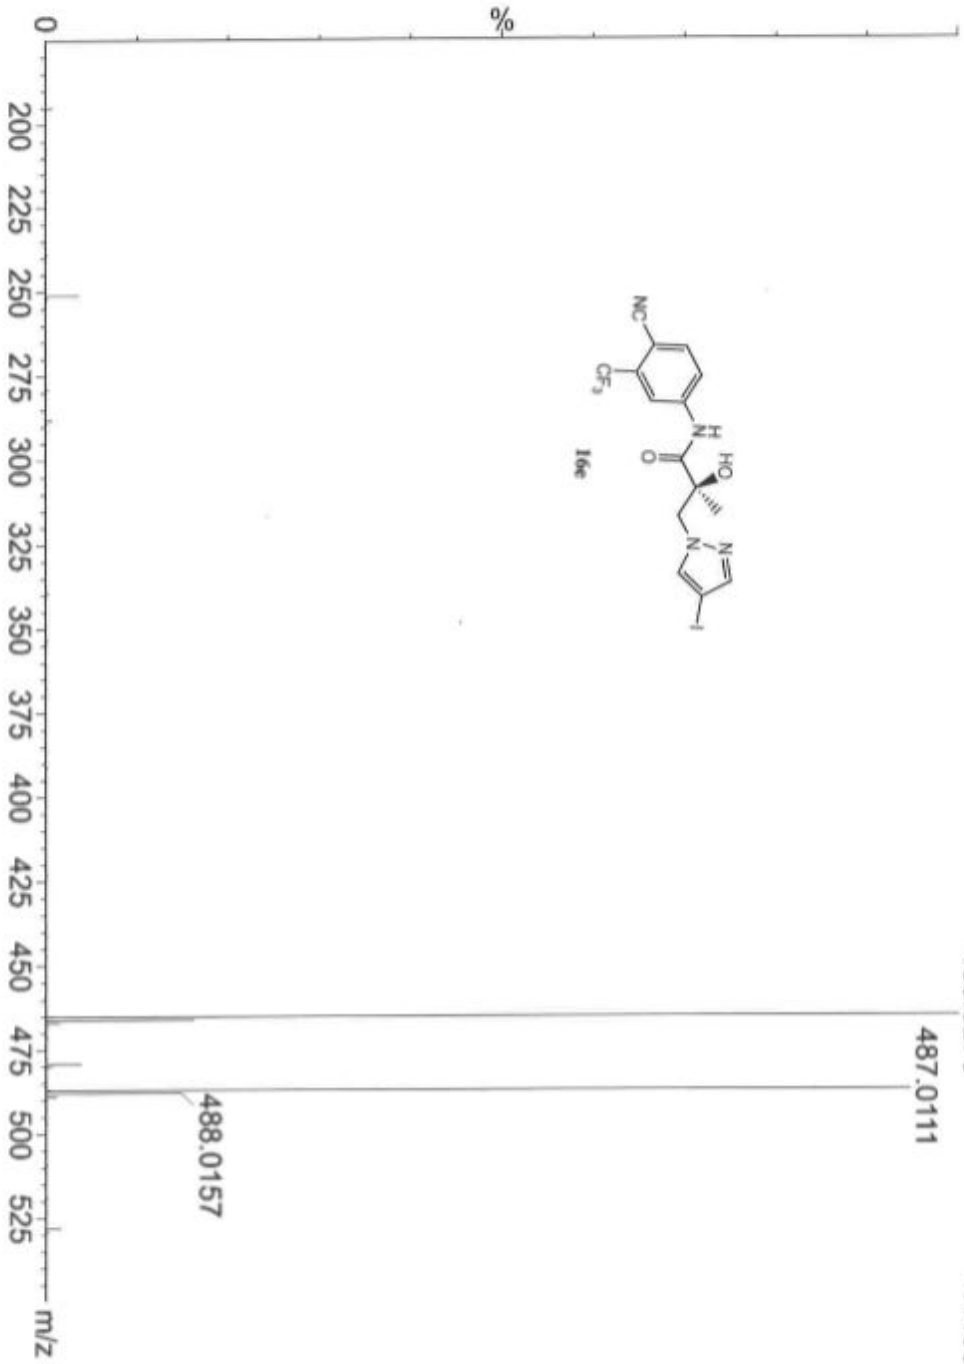

YH-II-091\_20191007\_8

3.21  
662513.5

3: Diode Array  
270 10.0000Da  
Range: 2.76e+1

| Time | Height   | Area      | Area% |
|------|----------|-----------|-------|
| 2.87 | 195919   | 4425.19   | 0.66  |
| 2.97 | 116665   | 420.28    | 0.06  |
| 3.12 | 19474    | 836.55    | 0.13  |
| 3.21 | 27271276 | 662513.50 | 99.15 |

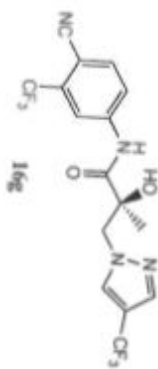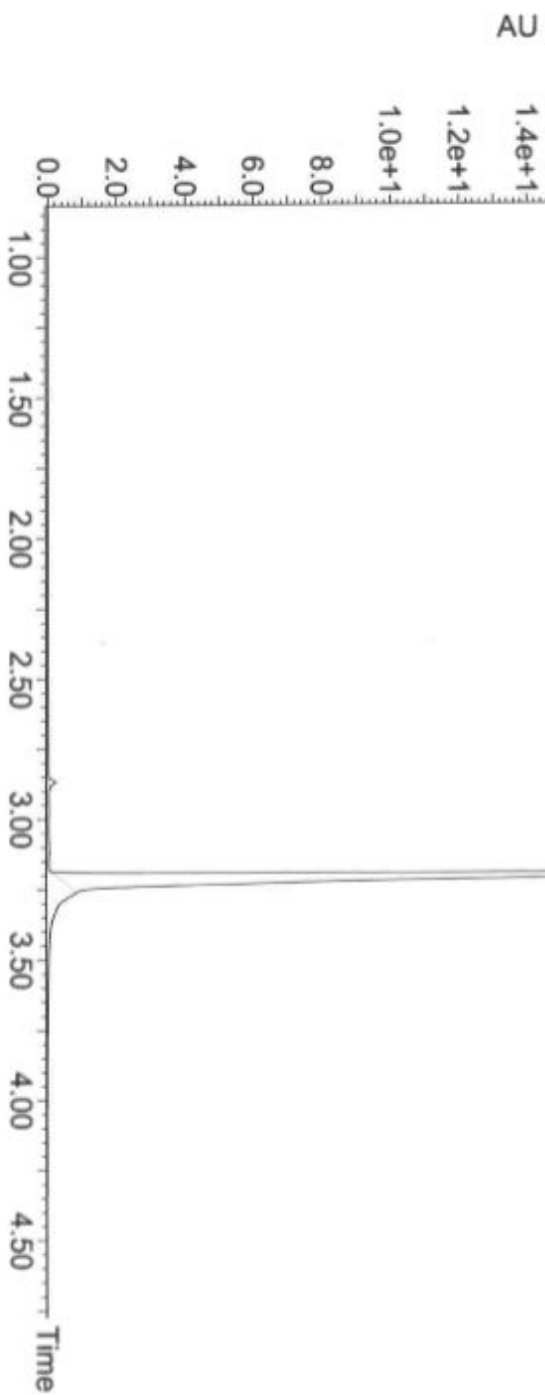

YH-II-091\_20191007\_8.268 (3.258)

407.1163

1: TOF MS ES+  
9.85e5

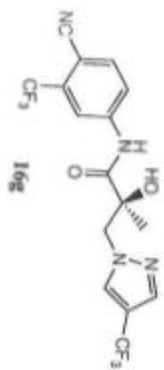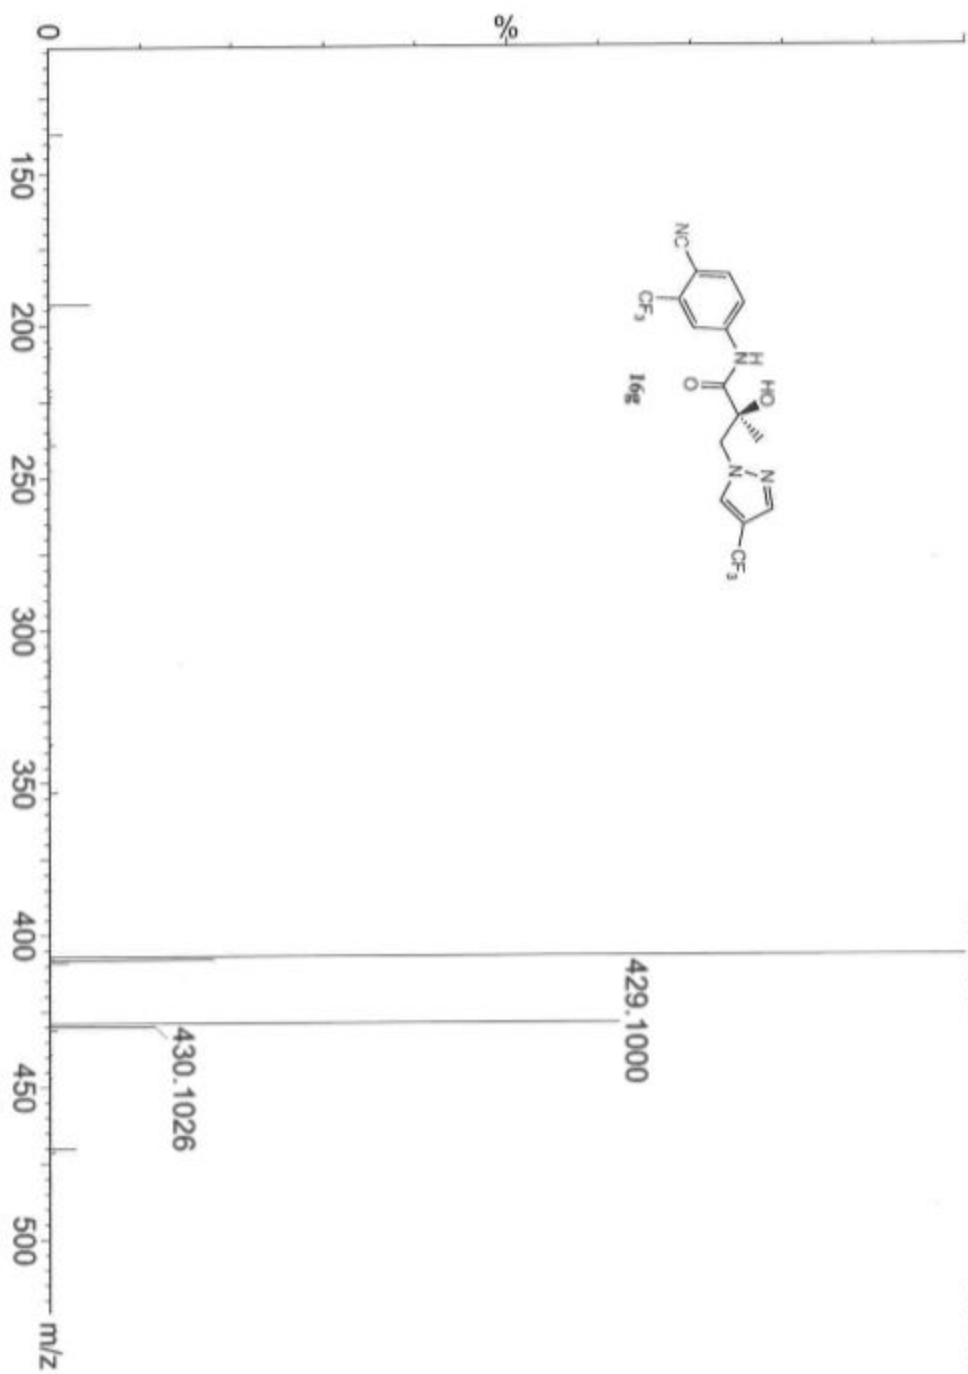

YH-II-063\_20191007\_9

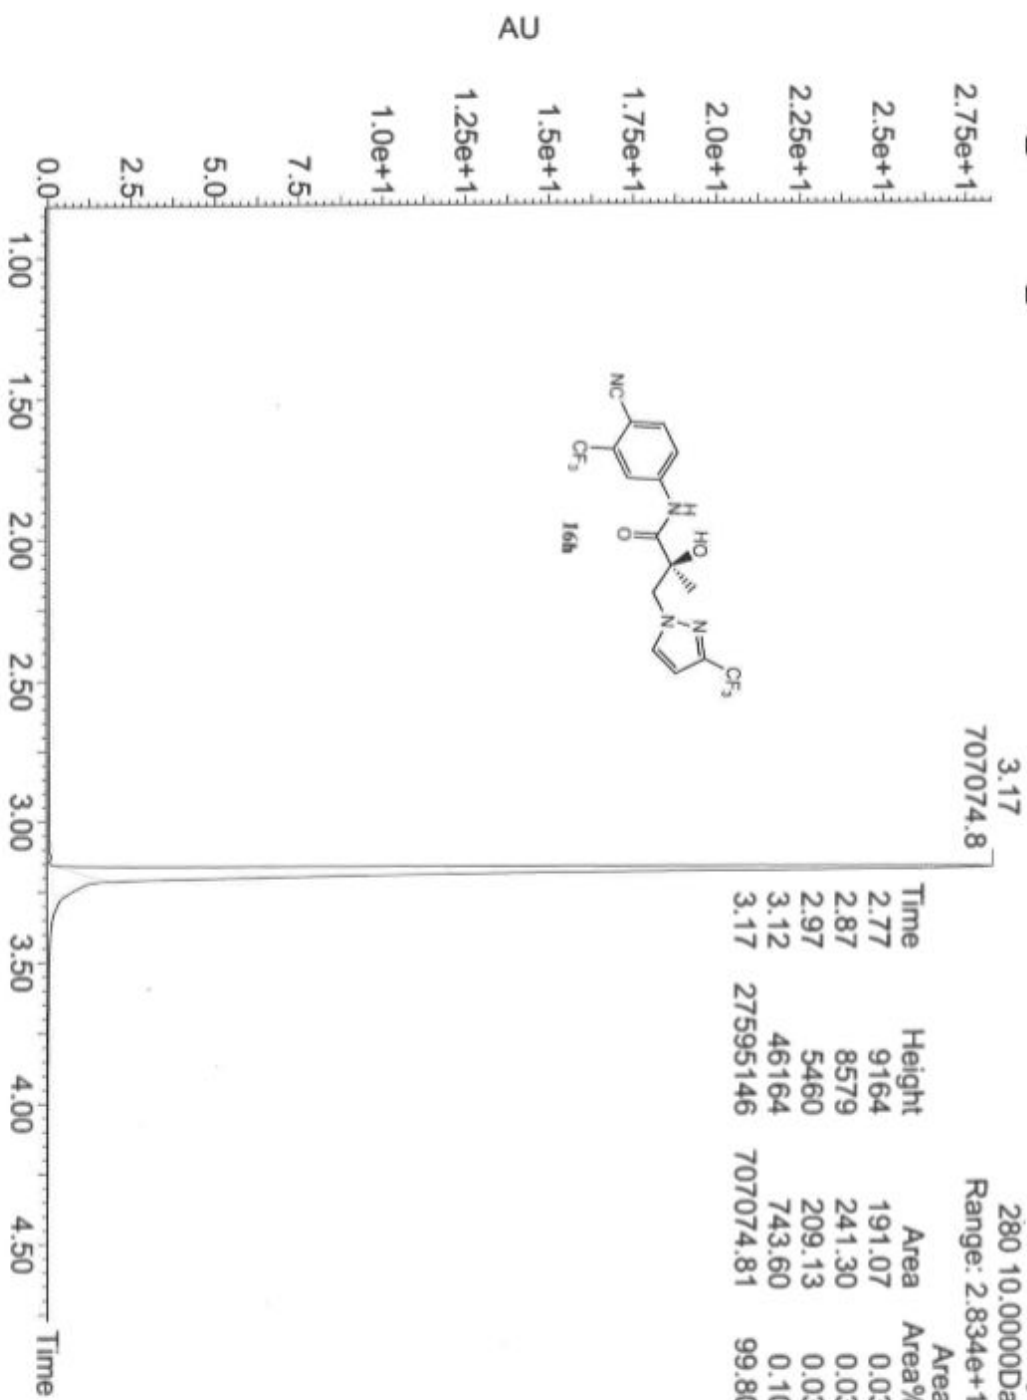

YH-II-063\_20191007\_9 264 (3.224)

429.0756

1: TOF MS ES+  
2.01e6

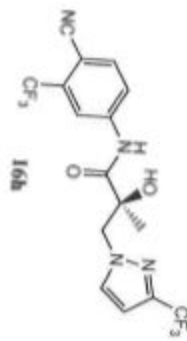

407.0931

430.0785

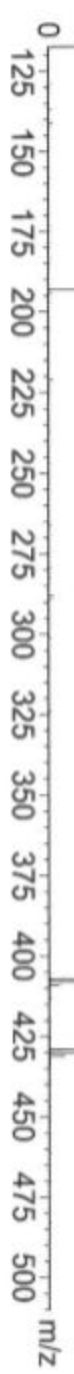



YH-II-203\_20191007\_10

3.00  
936967.0

3: Diode Array  
270 10.0000Da  
Range: 3.028e+1

| Time | Height   | Area      | Area% |
|------|----------|-----------|-------|
| 2.87 | 17694    | 452.53    | 0.05  |
| 3.00 | 30139828 | 936967.00 | 99.95 |

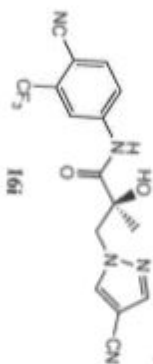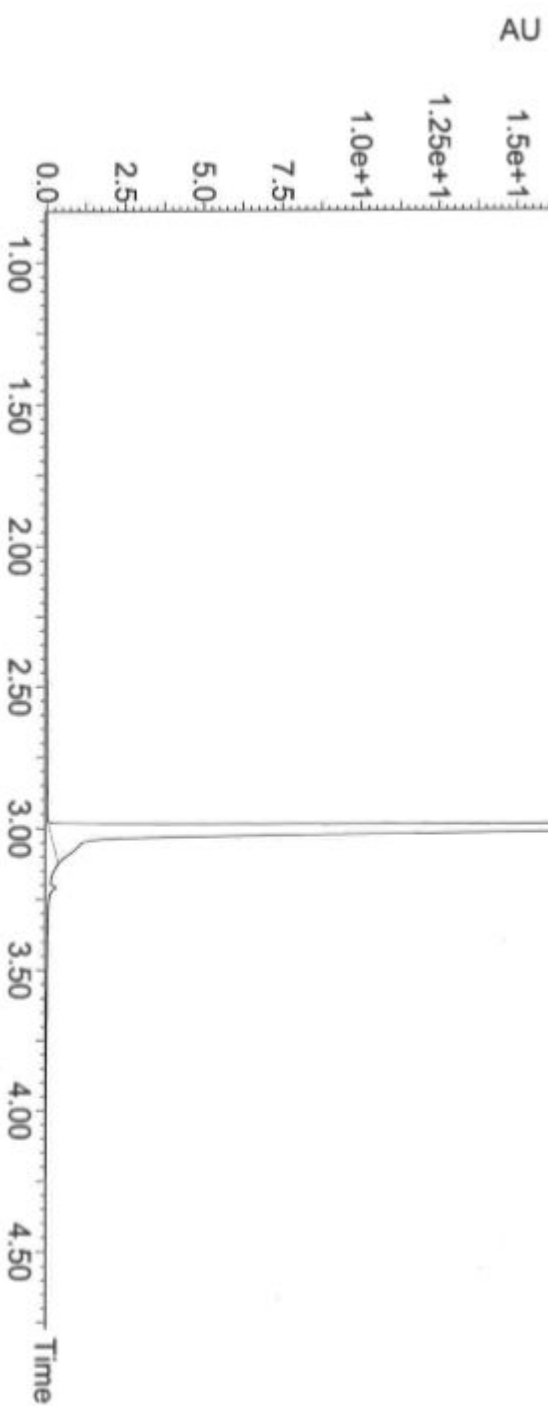

YH-II-203\_20191007\_10 245 (3.049)

1: TOF MS ES+  
2.40e6

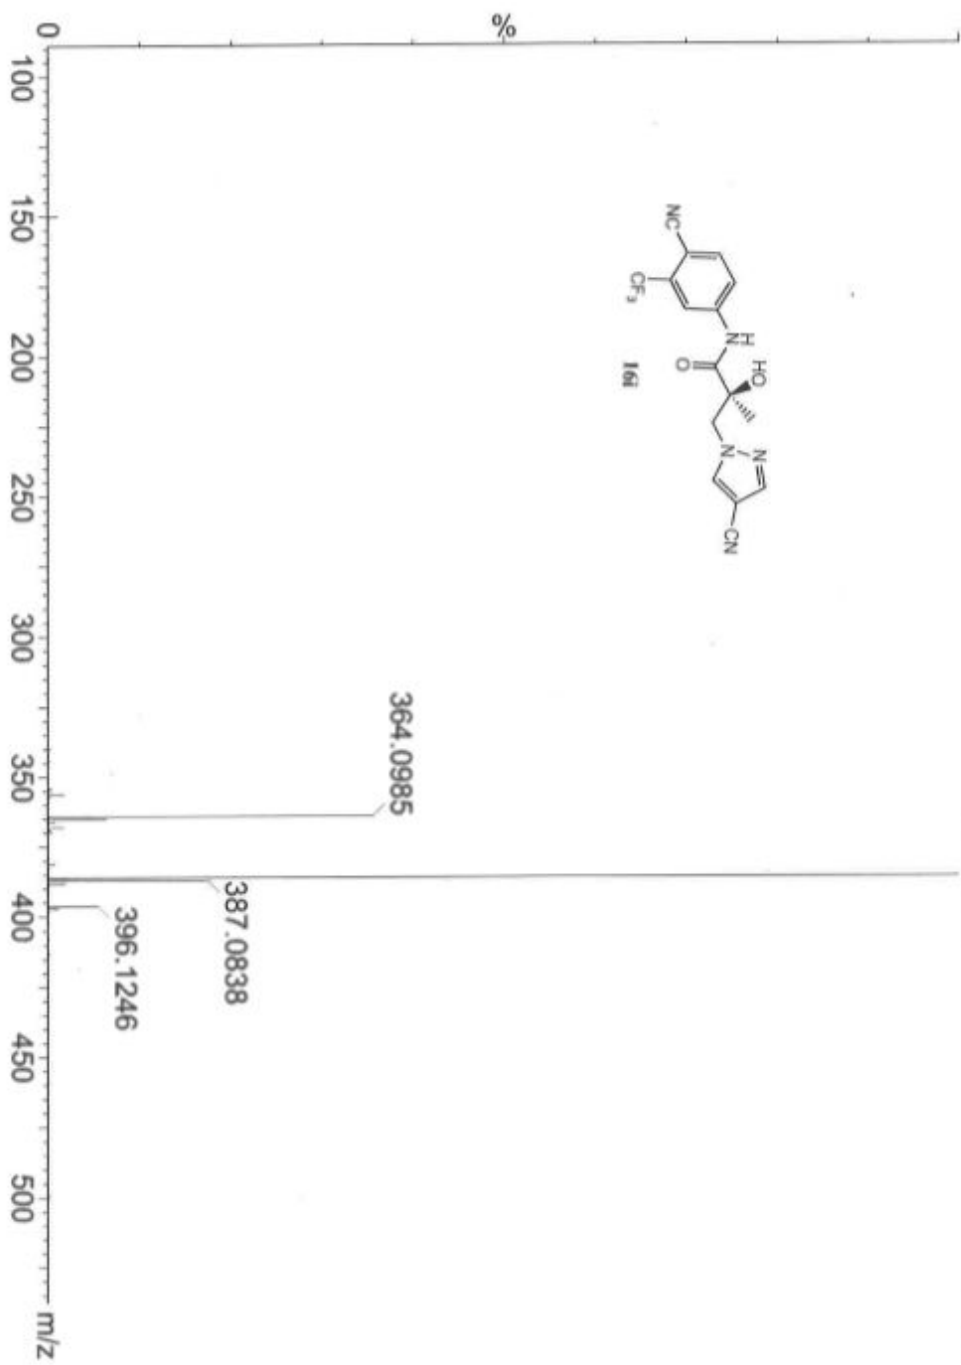

YH-III-207\_20191007\_11

3.08  
1254775.1

3: Diode Array  
270 10.0000Da  
Range: 3.226e+1

| Time | Height   | Area       | Area% |
|------|----------|------------|-------|
| 2.87 | 66984    | 1703.10    | 0.14  |
| 2.95 | 20510    | 406.13     | 0.03  |
| 3.02 | 63967    | 949.33     | 0.08  |
| 3.08 | 31052224 | 1254775.13 | 99.76 |

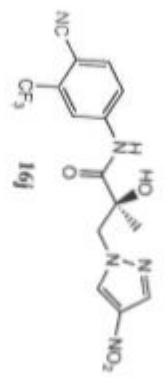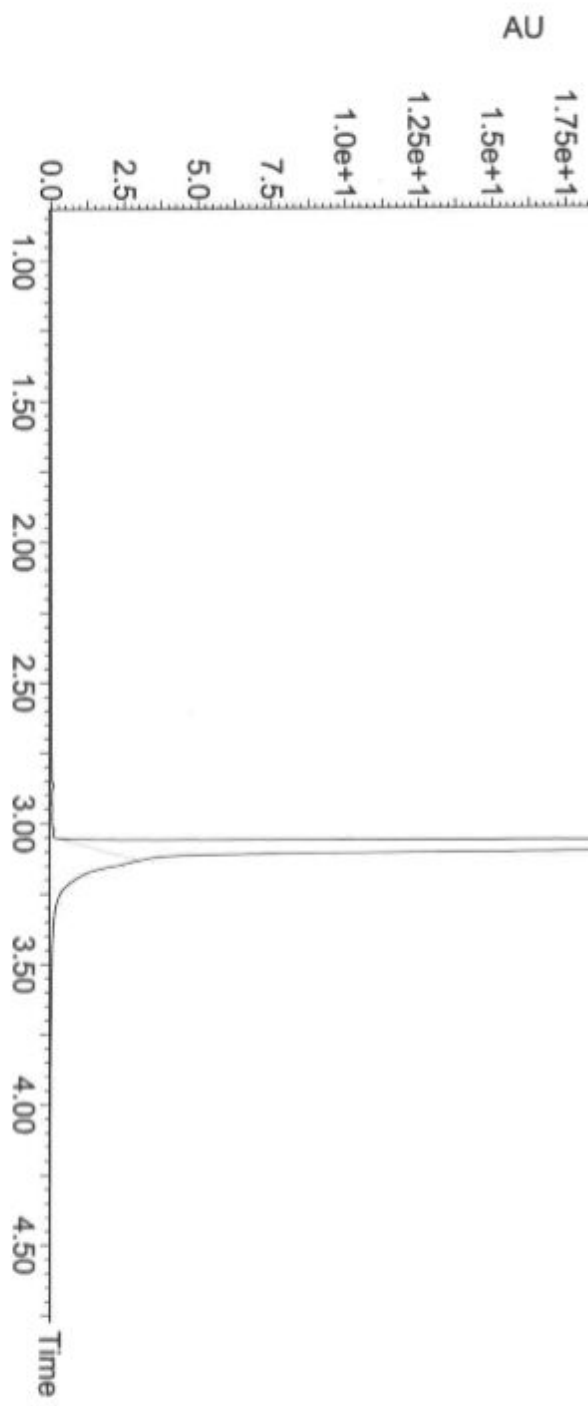

YH-III-207\_20191007\_11 253 (3.129)

1: TOF MS ES+  
1.69e6

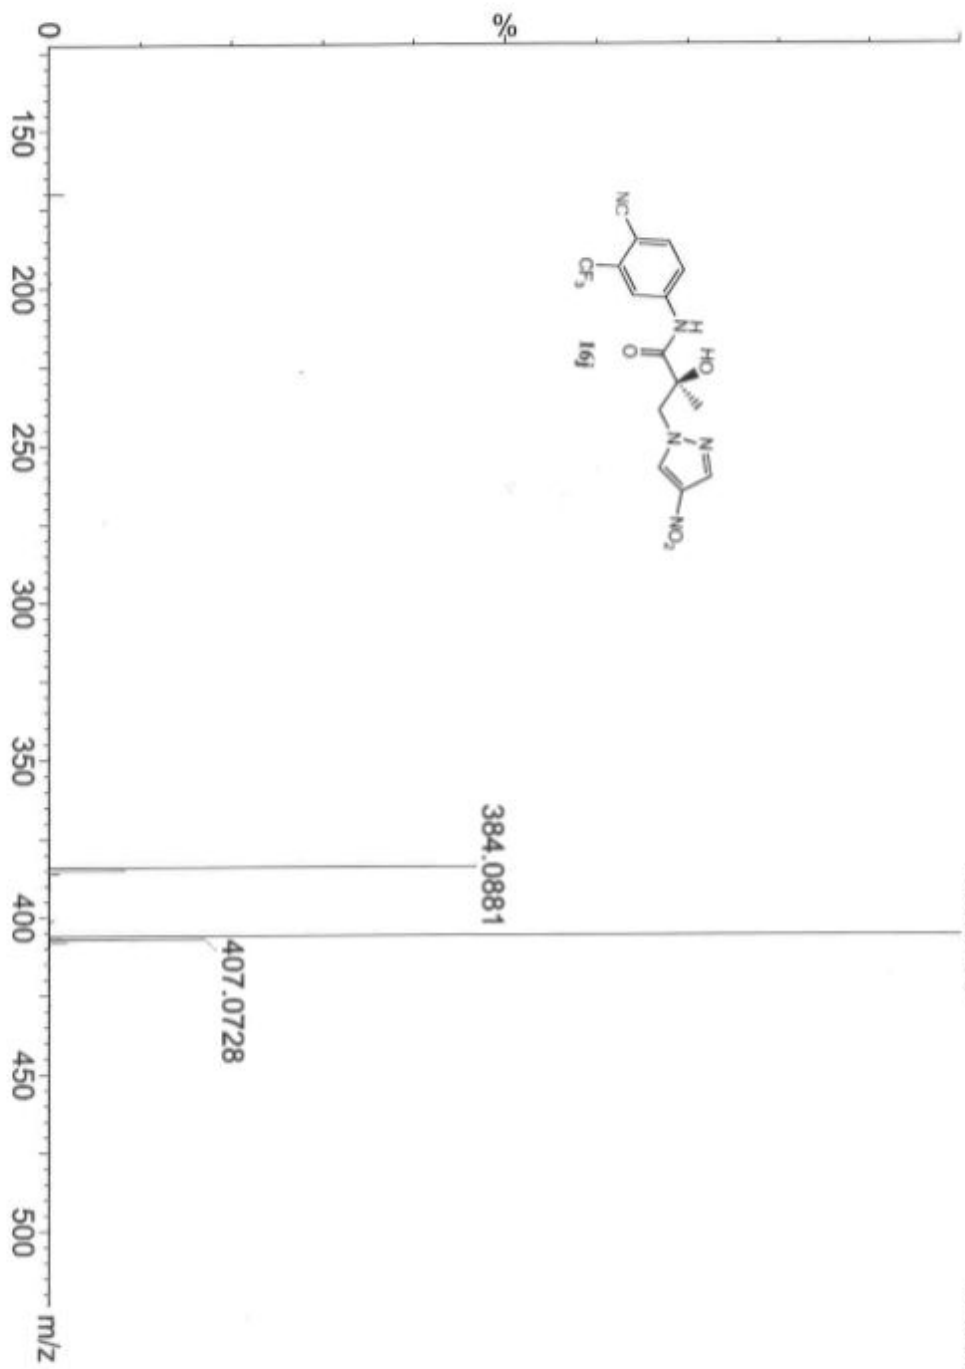

YH-II-273\_20191007\_12

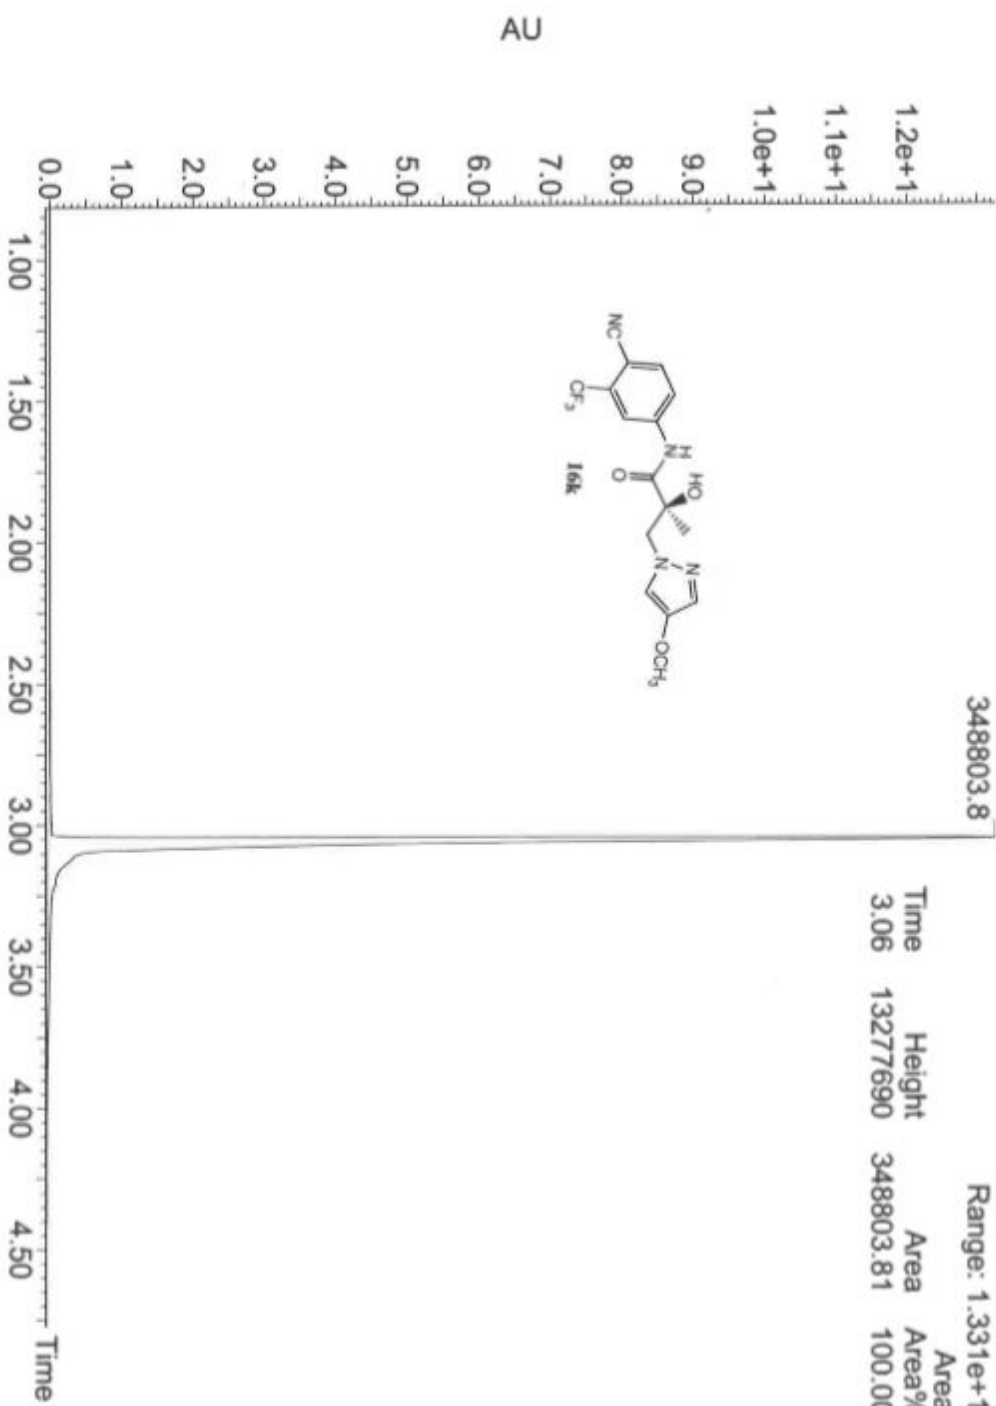

YH-II-273\_20191007\_12 252 (3.109)

1: TOF MS ES+  
1.82e6

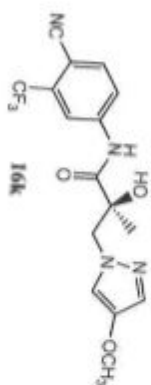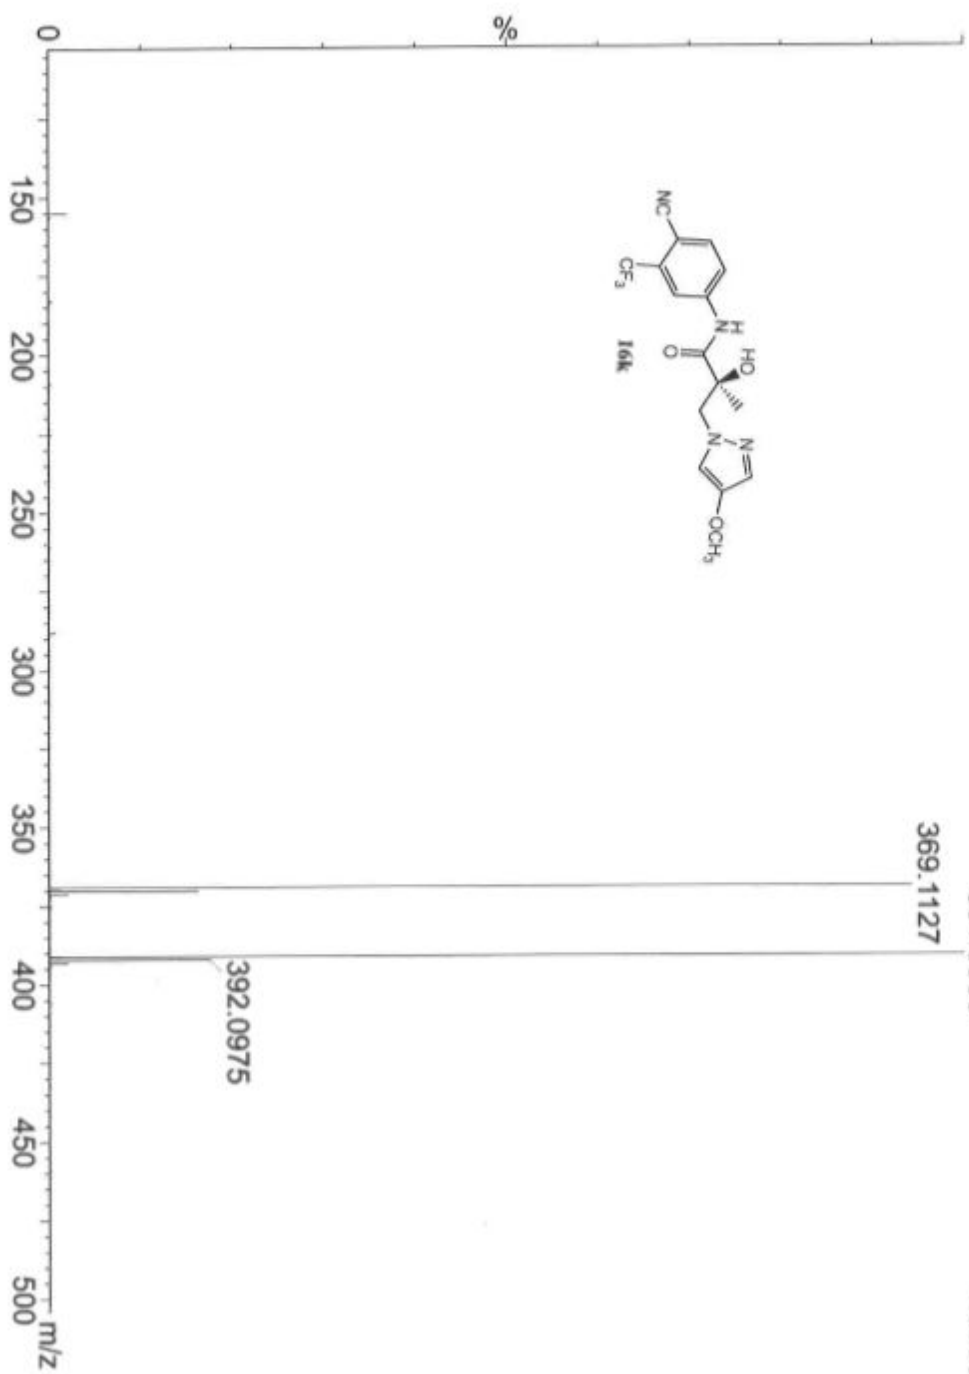

YH-II-281\_20191007\_13

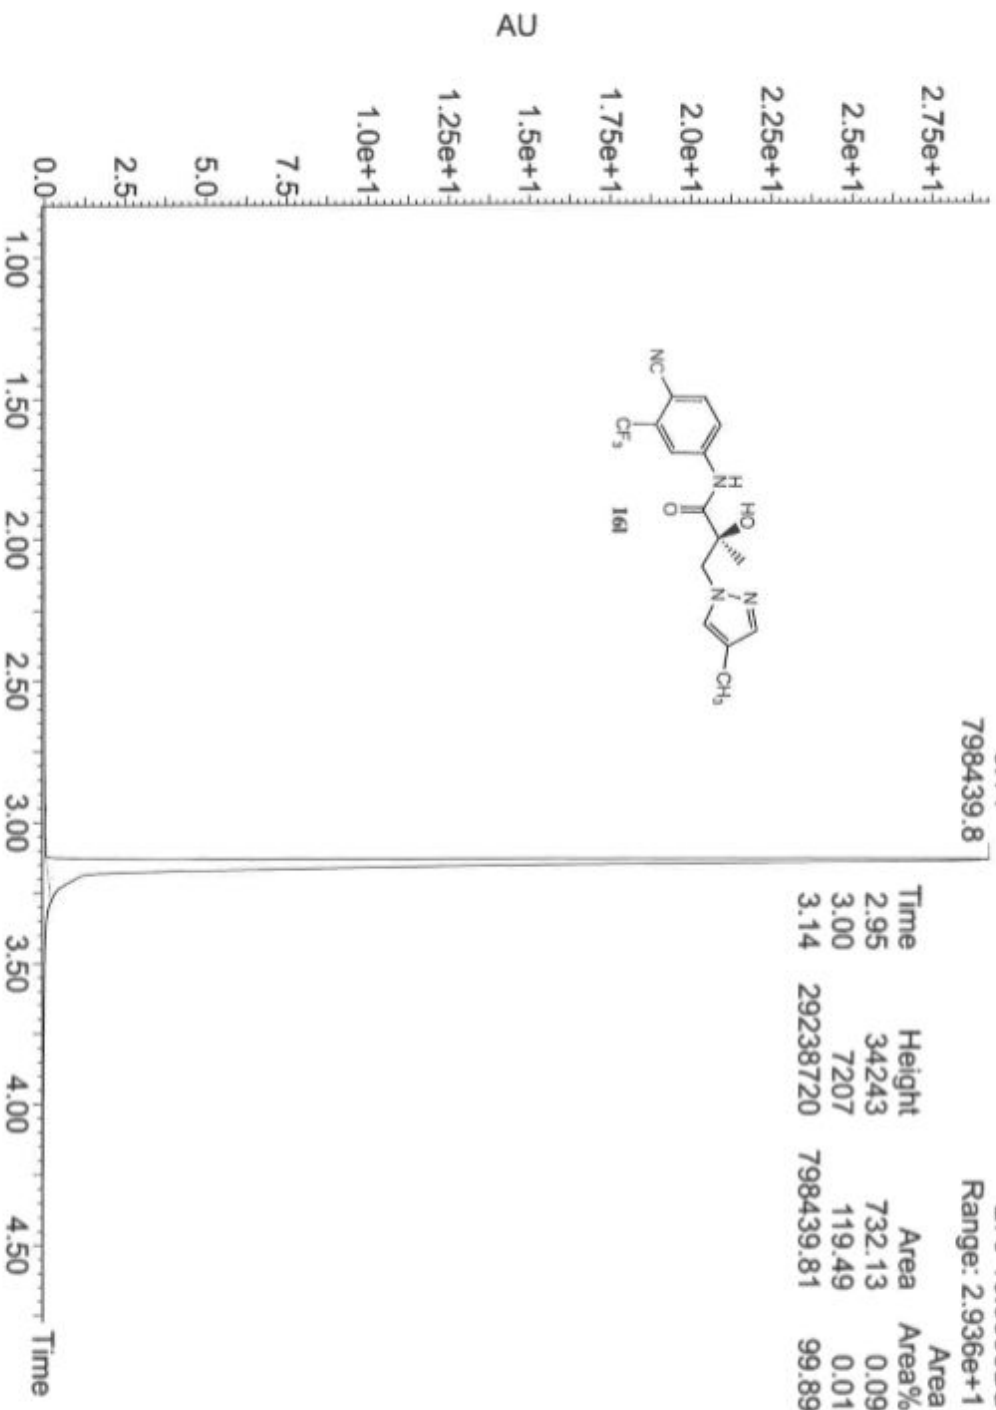

YH-II-281\_20191007\_13 261 (3.198)

353.1191

1: TOF MS ES+  
2.32e6

375.1013

376.1040

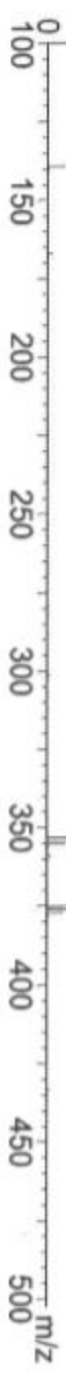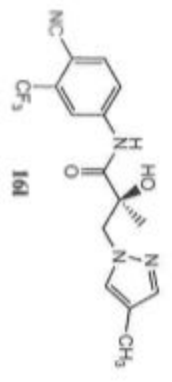



YH-II-011\_20191007\_14

3: Diode Array  
265 10.0000Da  
Range: 3.061e+1

| Time | Height   | Area      | Area% |
|------|----------|-----------|-------|
| 2.86 | 64534    | 2436.75   | 0.30  |
| 3.13 | 38539    | 2714.62   | 0.33  |
| 3.28 | 30251430 | 817703.63 | 99.37 |

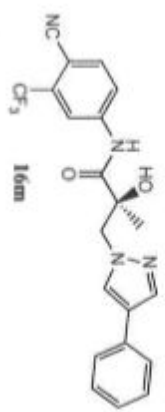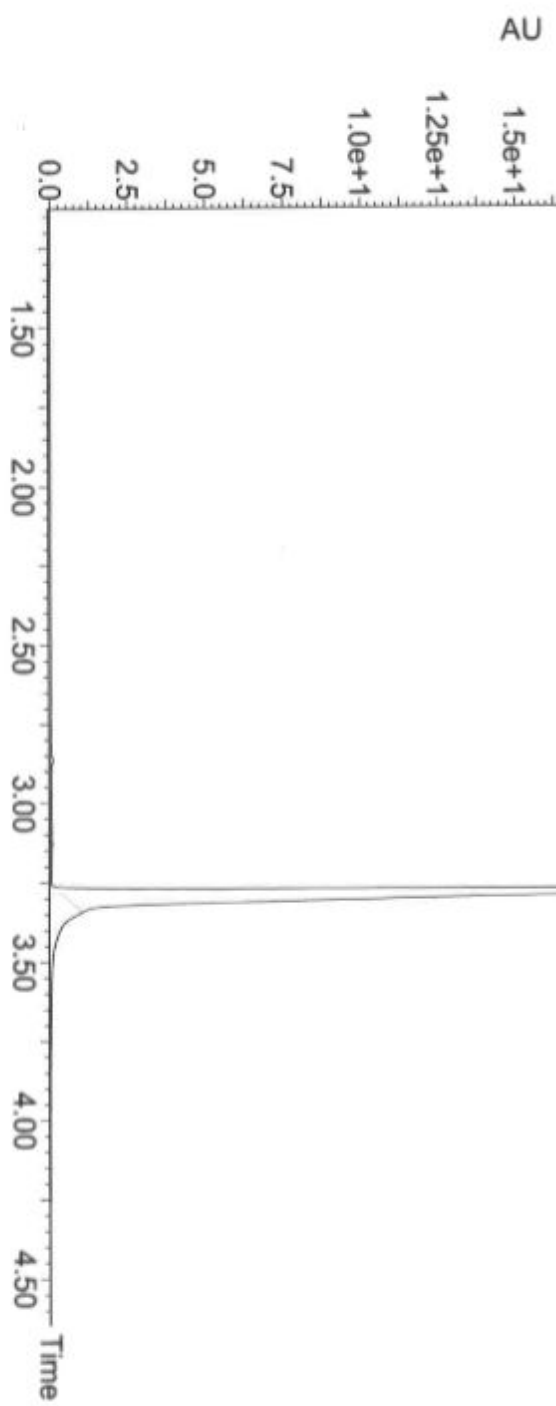

YH-II-011\_20191007\_14 275 (3.330)

437.1192

1: TOF MS ES+  
2.26e6

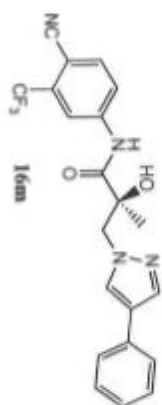

415.1368

438.1224

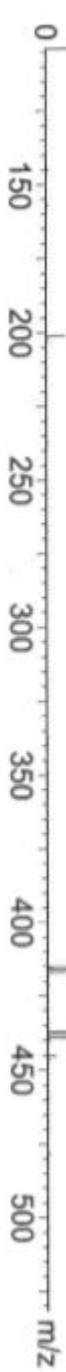

YH-II-043\_20191007\_15

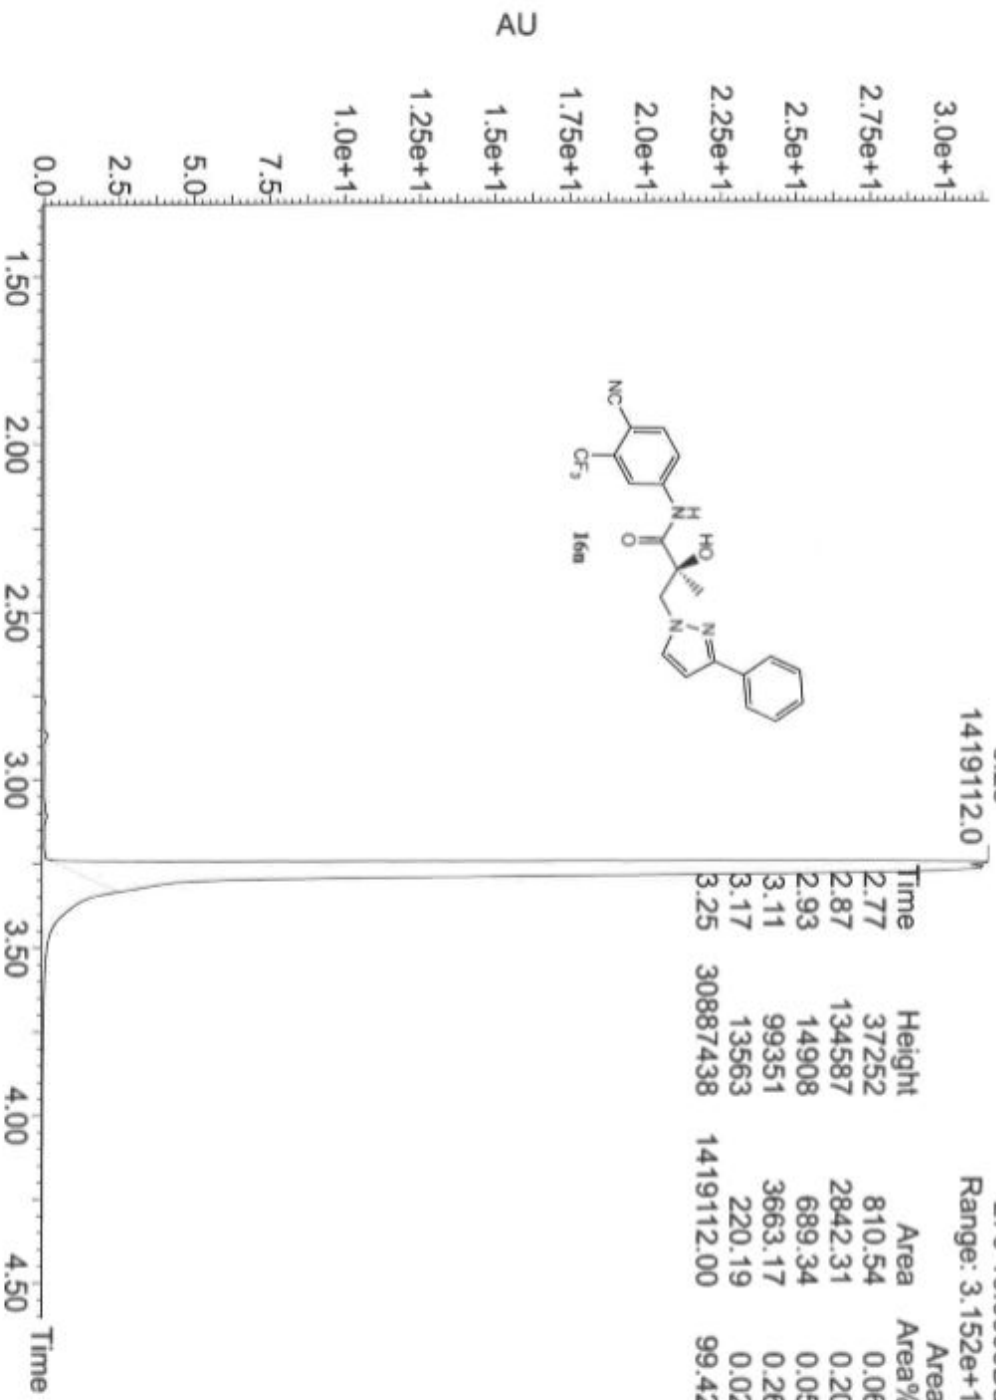

YH-II-043\_20191007\_15 273 (3.312)

1: TOF MS ES+  
3.27e6

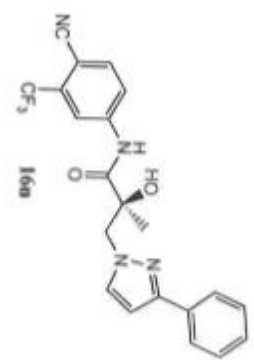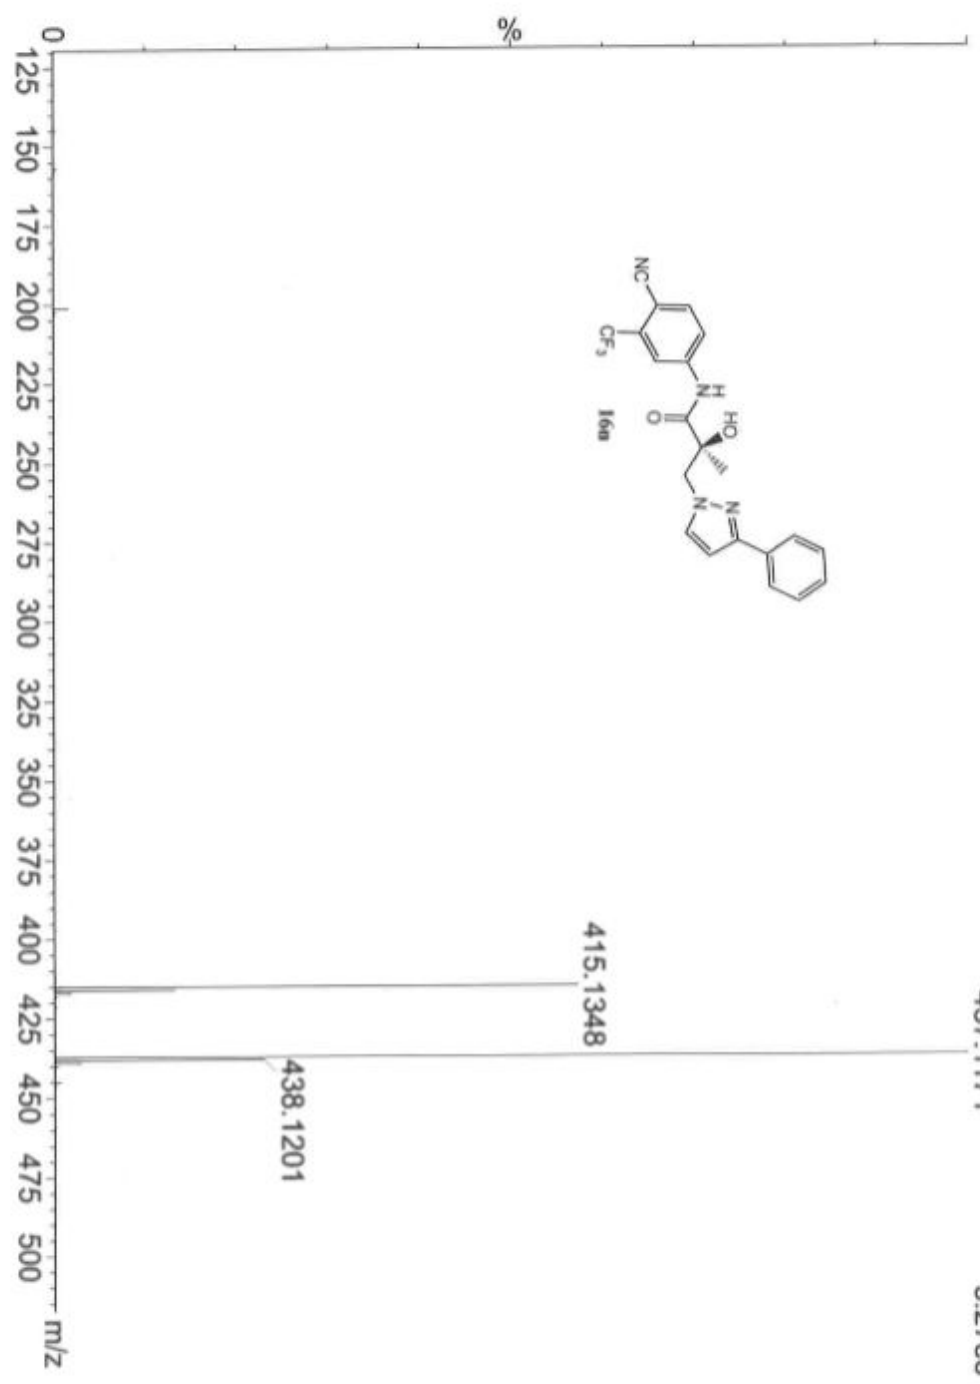

YH-II-171\_20191007\_16

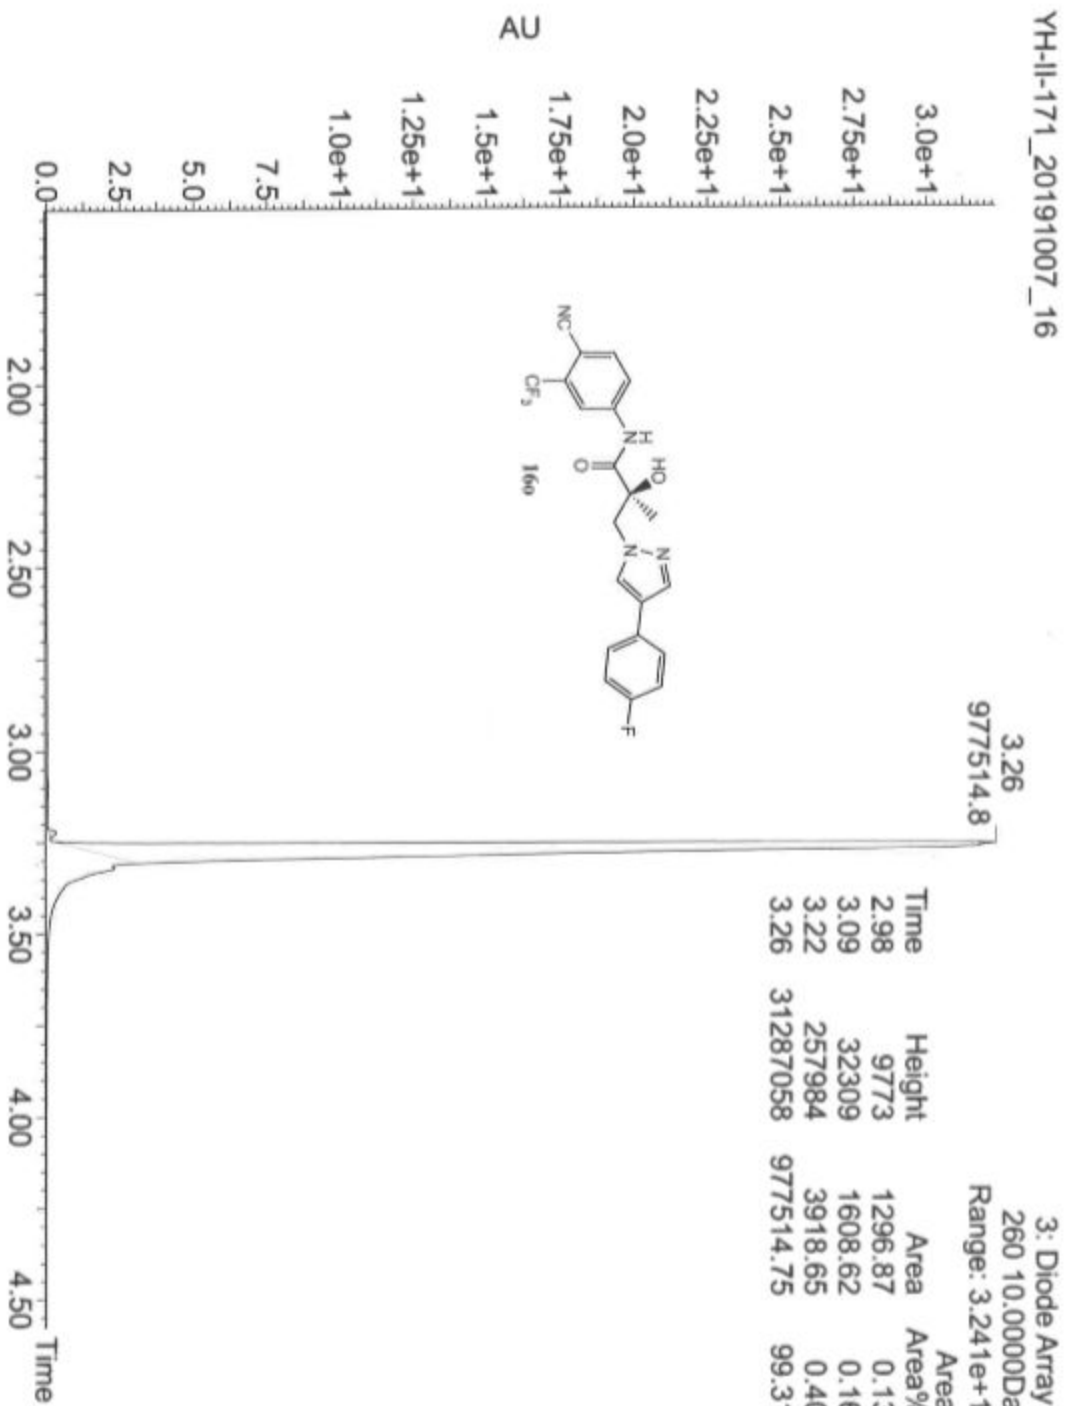

YH-II-171\_20191007\_16 273 (3.312)

1: TOF MS ES+  
455.1057 2.81e6

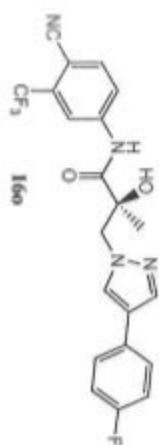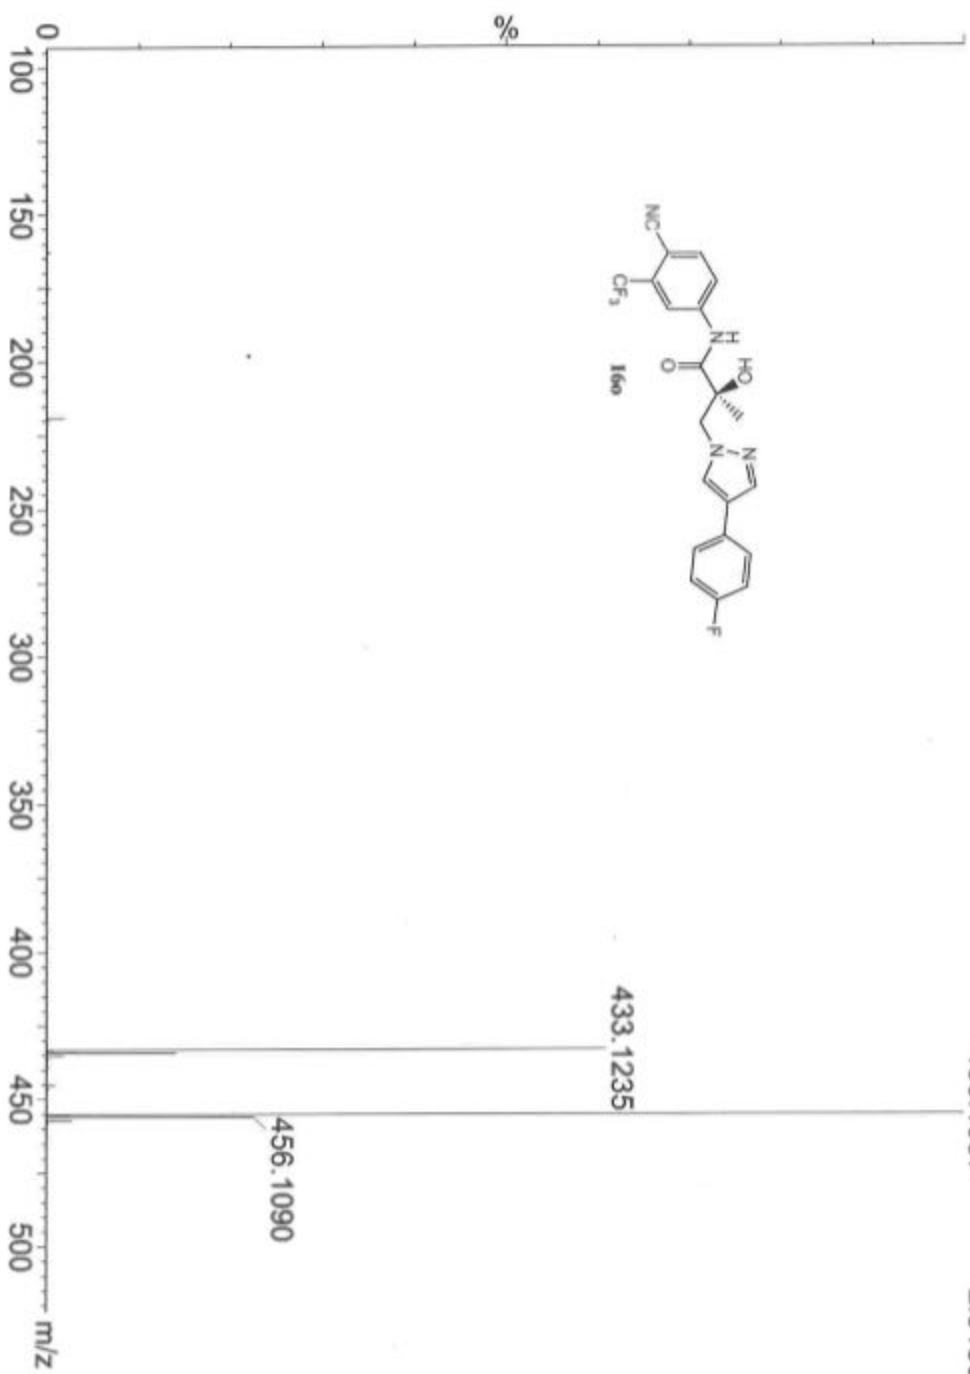

YH-II-167\_20191007\_17

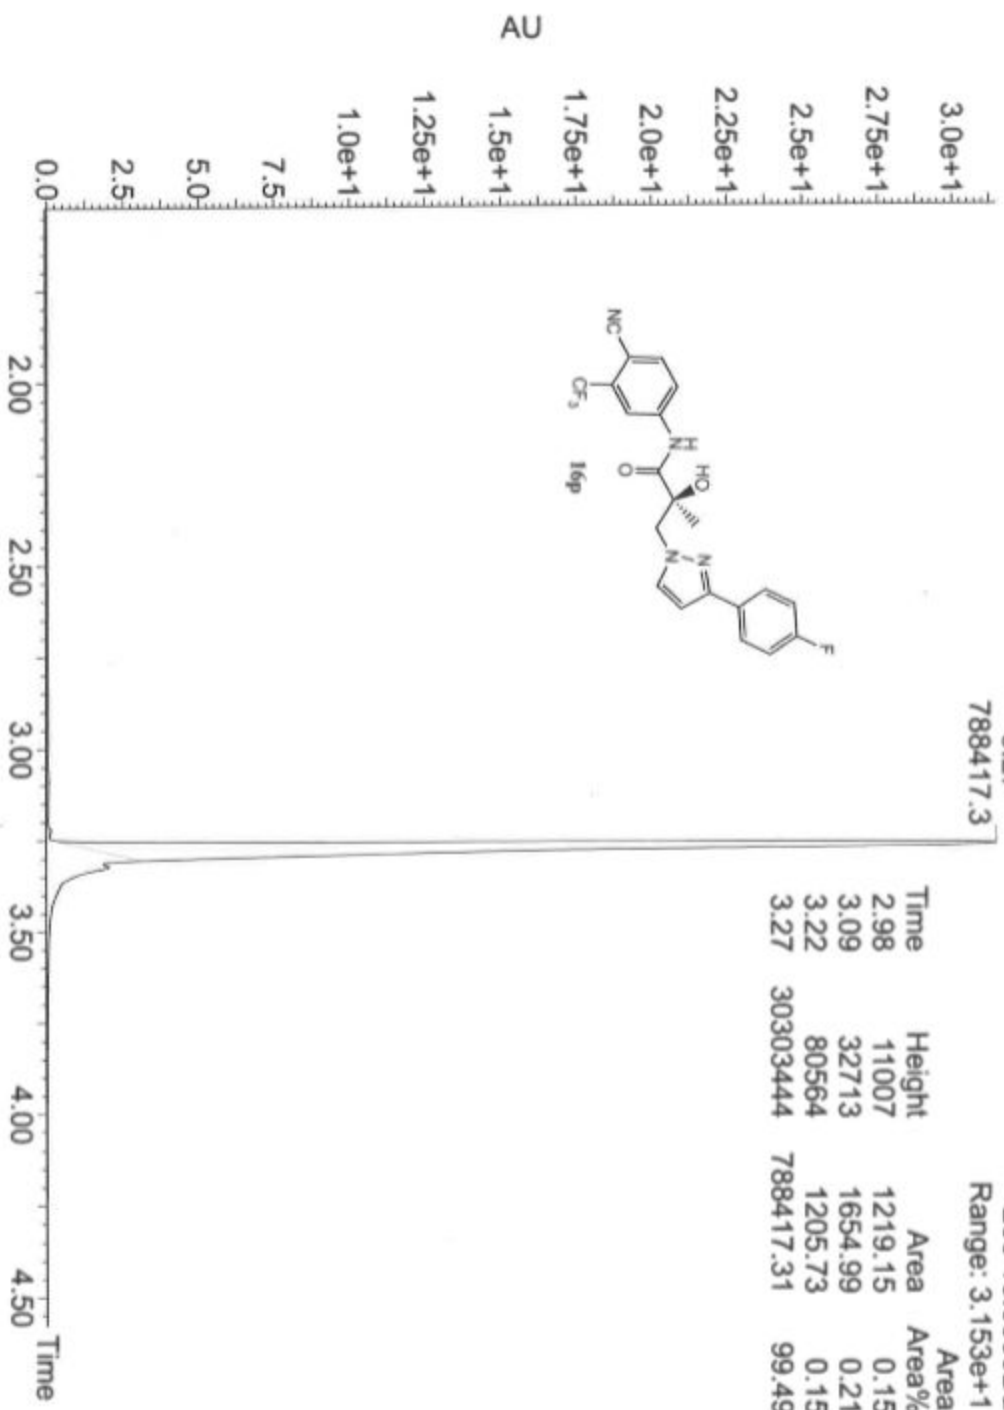

YH-II-167\_20191007\_17 273 (3.312)

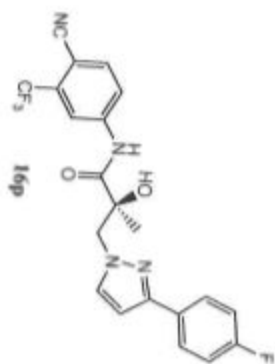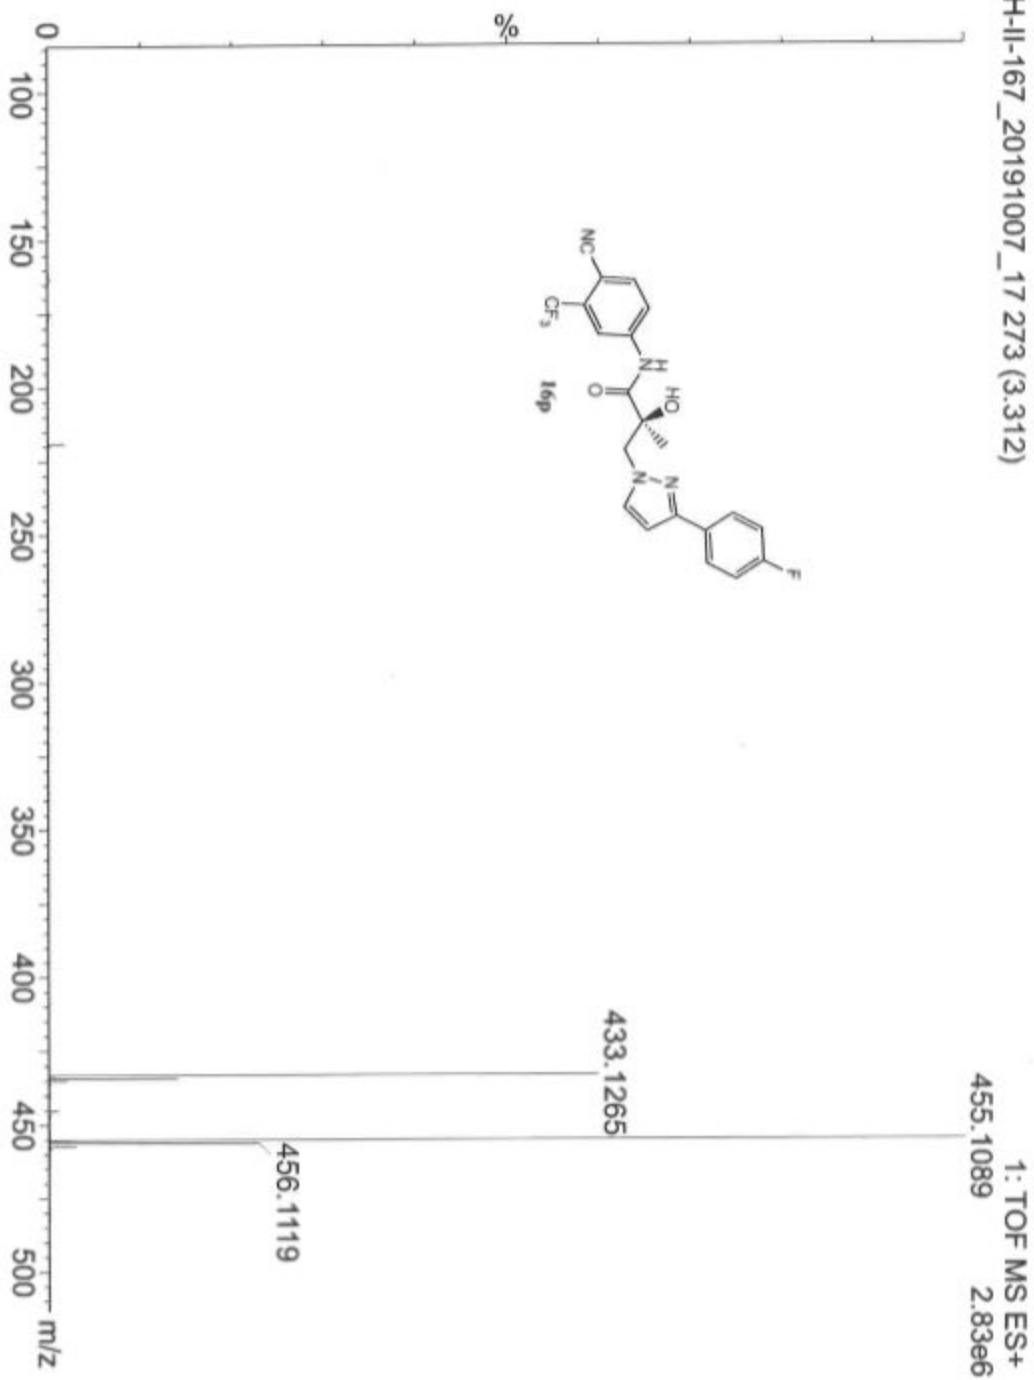



YH-III-177\_20191007\_18

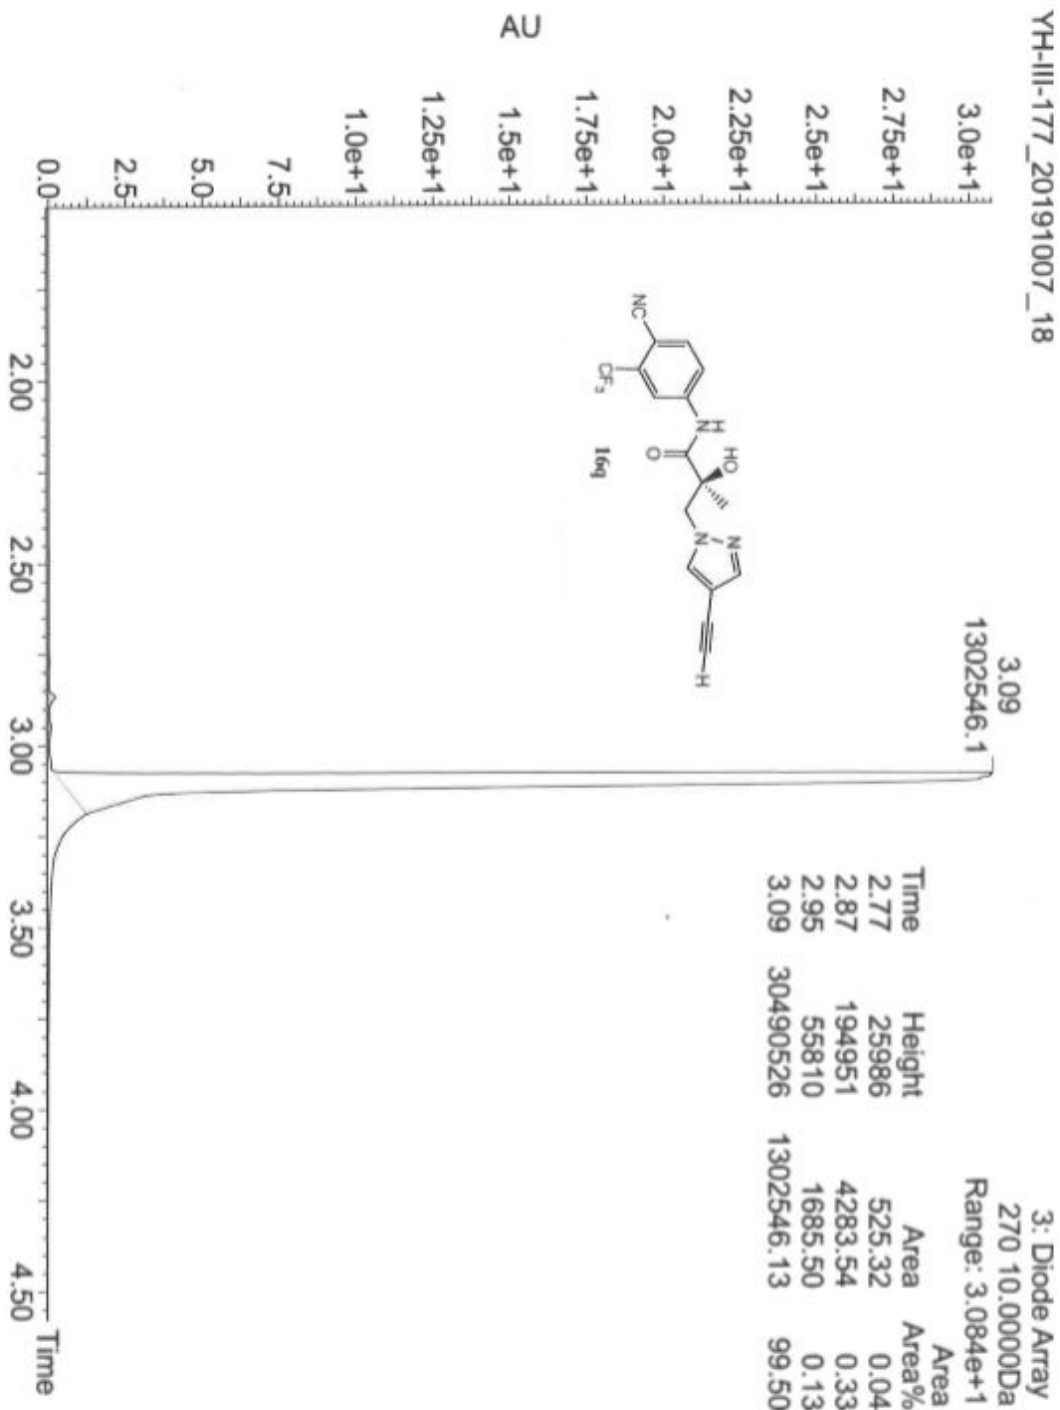

YH-III-177\_20191007\_18 255 (3.147)

1: TOF MS ES+  
1.71e6

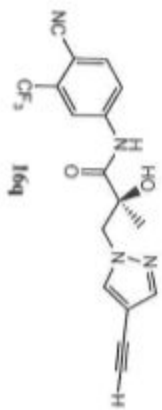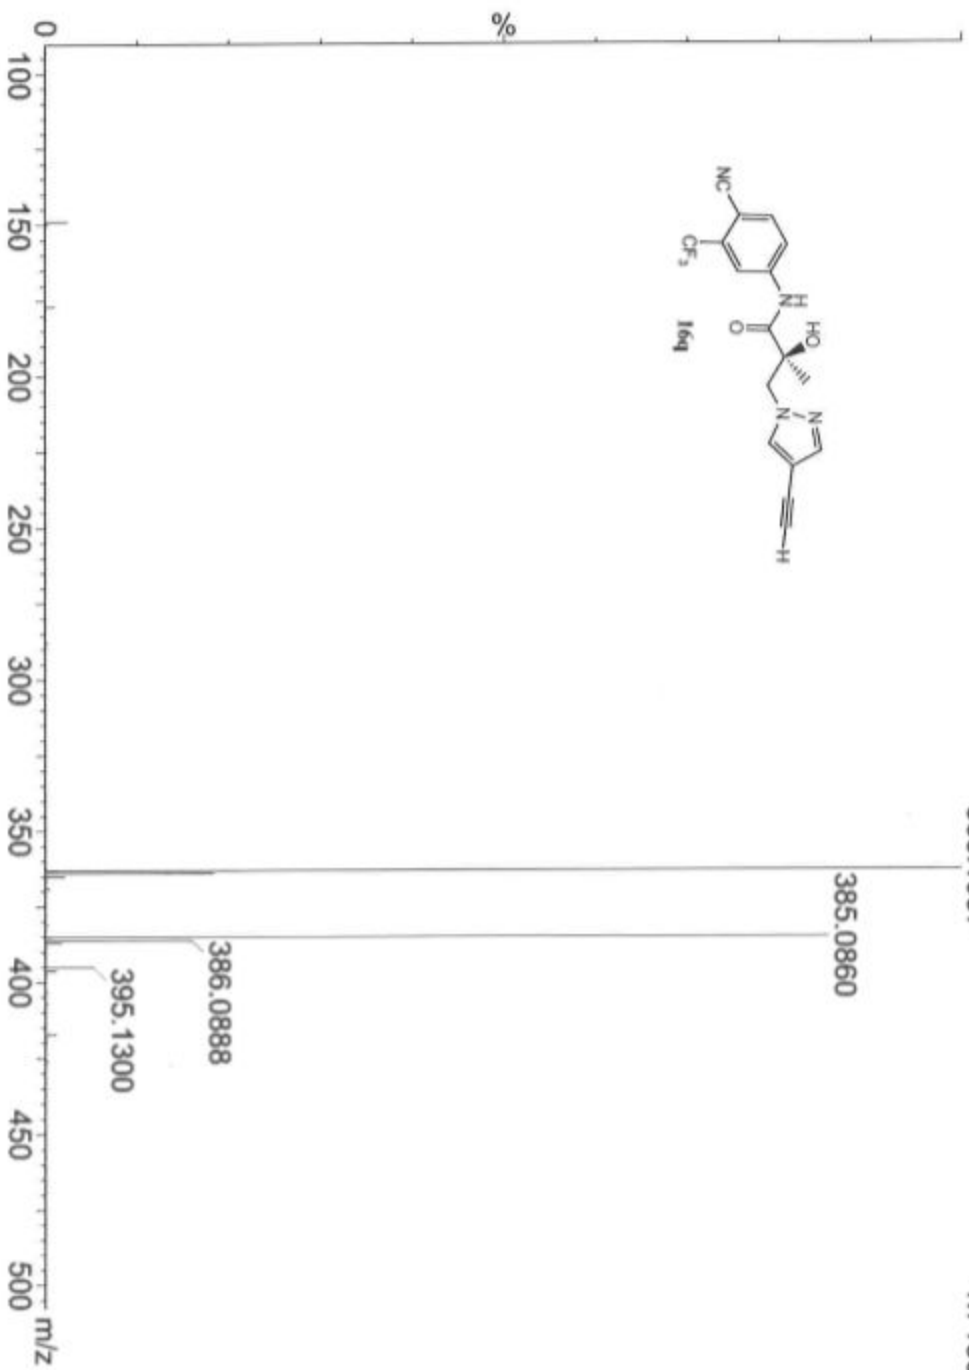

DJ-VII-157\_16s\_20191112\_1

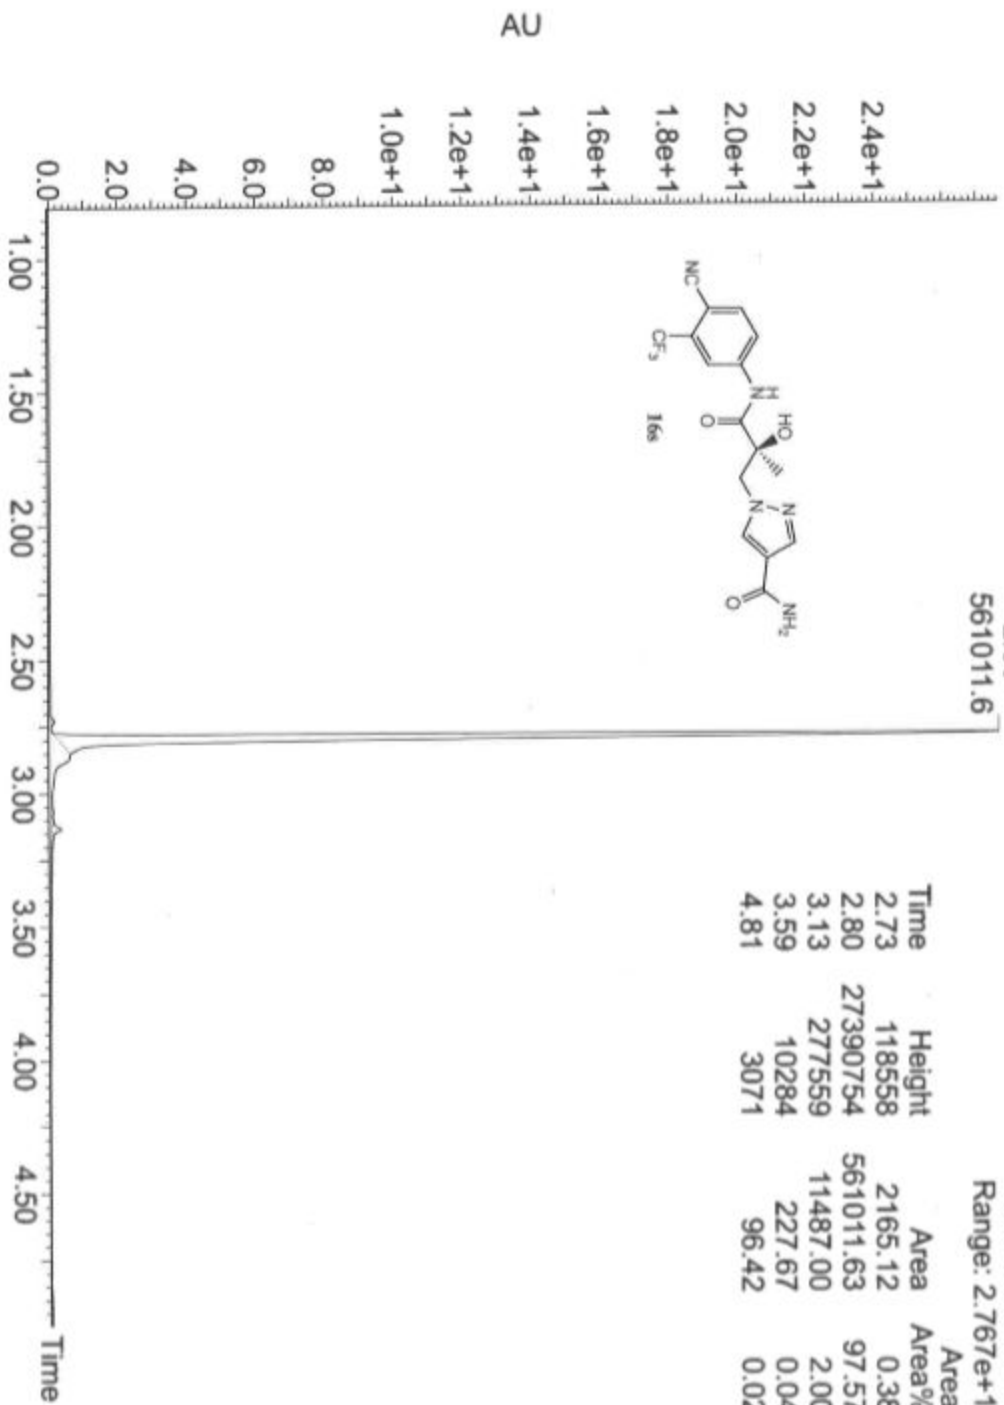

3: Diode Array  
270 10.0000Da  
Range: 2.767e+1

| Time | Height   | Area      | Area% |
|------|----------|-----------|-------|
| 2.73 | 118558   | 2165.12   | 0.38  |
| 2.80 | 27390754 | 561011.63 | 97.57 |
| 3.13 | 277559   | 11487.00  | 2.00  |
| 3.59 | 10284    | 227.67    | 0.04  |
| 4.81 | 3071     | 96.42     | 0.02  |

DJ-VII-157\_16s\_20191112\_1 224 (2.858)

404.0945

1: TOF MS ES+  
1.42e6

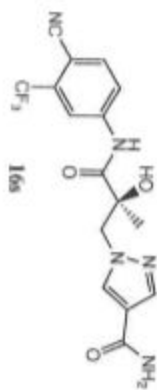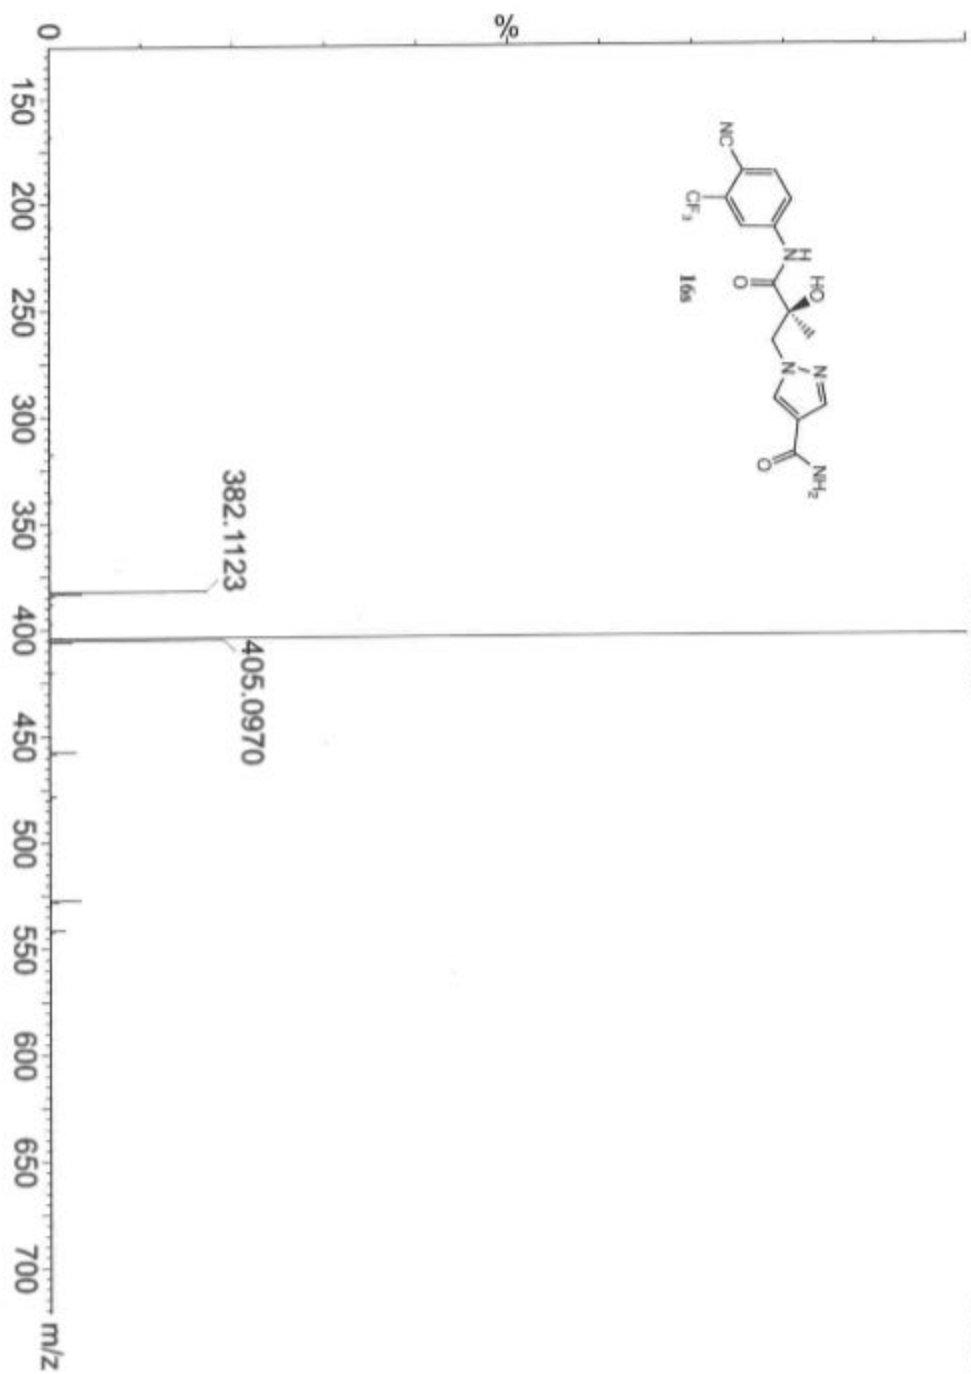

DJ-VI-303\_16u\_20191112\_4

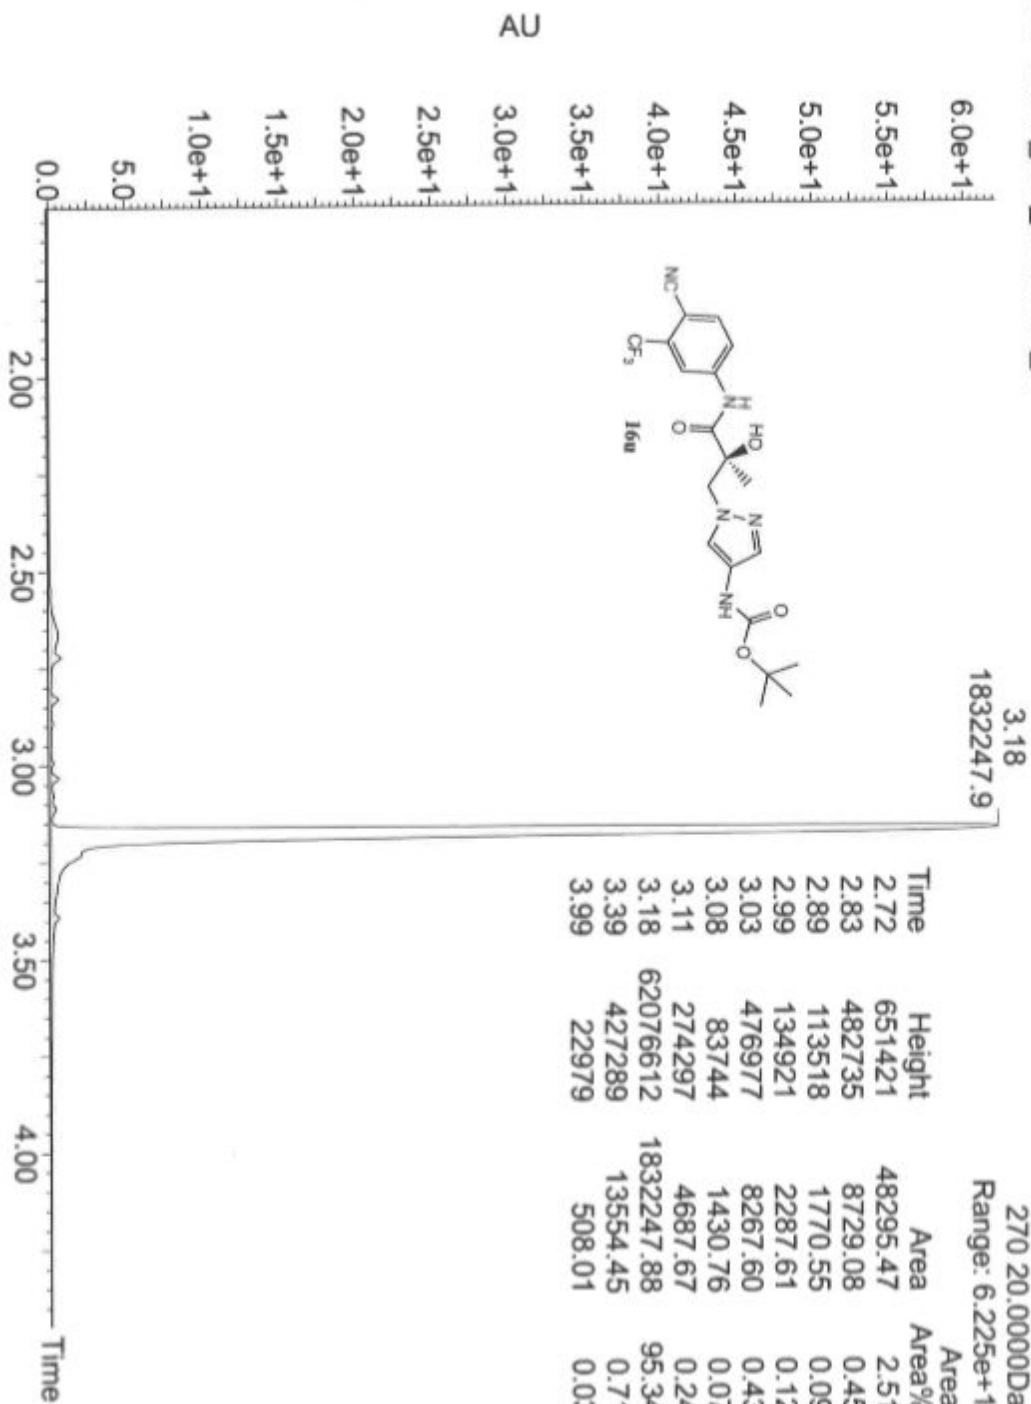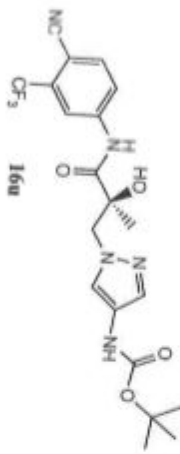

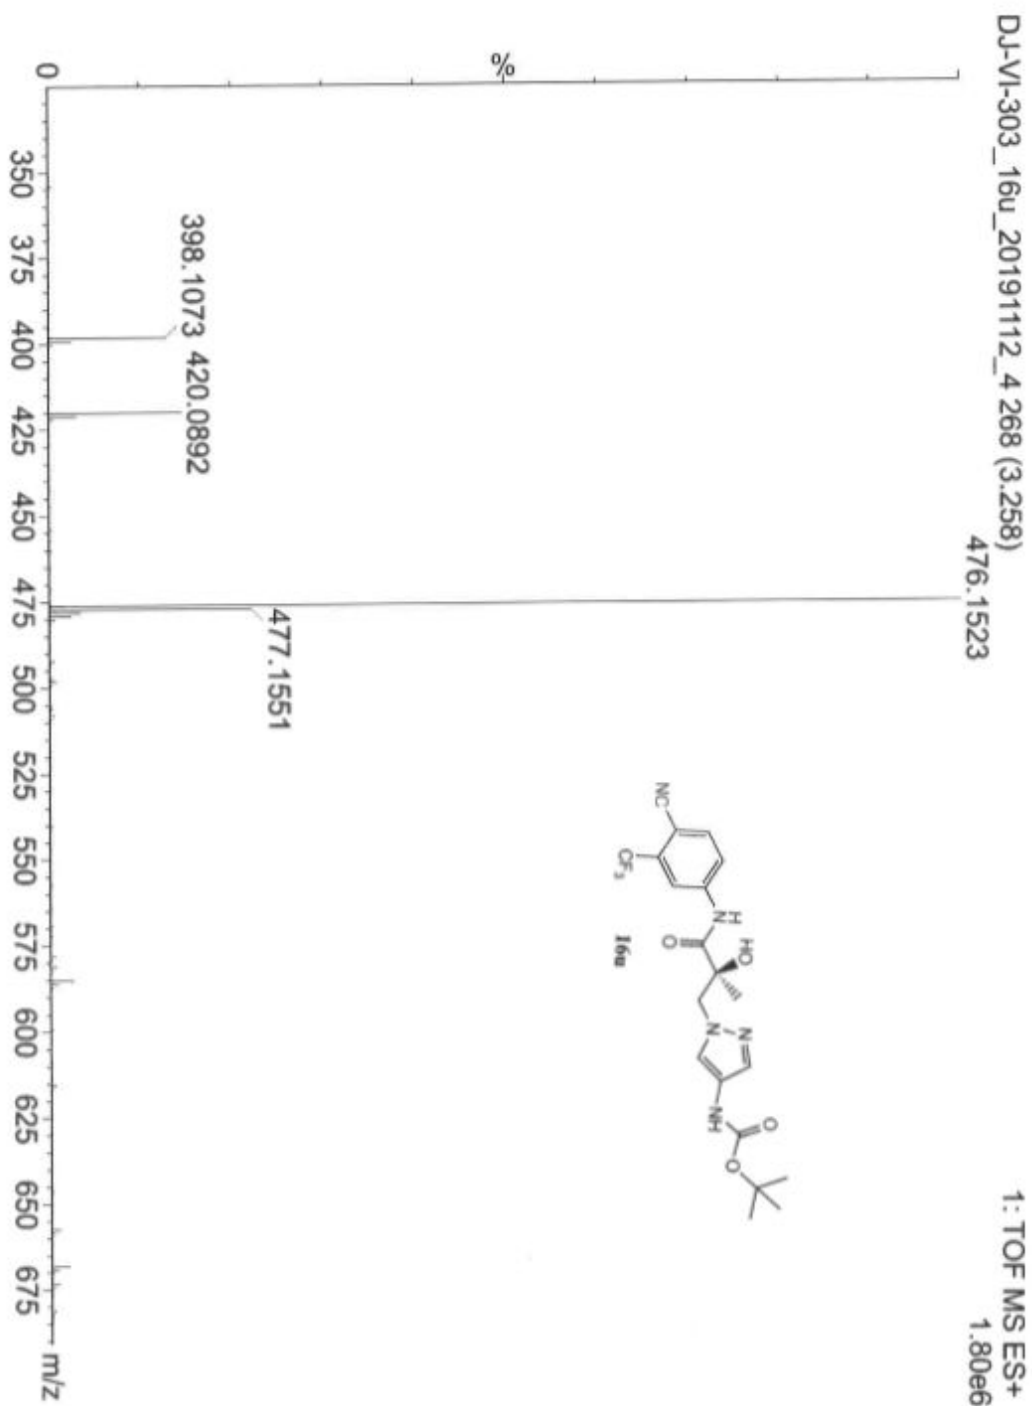

DJ-VI-295\_16v\_20191112\_3

2.87  
1072651.9

3: Diode Array  
270 20.0000Da  
Range: 5.335e+1

| Time | Height   | Area       | Area% |
|------|----------|------------|-------|
| 2.80 | 70956    | 2187.71    | 0.19  |
| 2.87 | 52913068 | 1072651.88 | 94.26 |
| 2.95 | 2329878  | 42993.16   | 3.78  |
| 3.03 | 15848    | 197.19     | 0.02  |
| 3.07 | 103582   | 1900.61    | 0.17  |
| 3.11 | 149561   | 4361.95    | 0.38  |
| 3.20 | 287191   | 13453.02   | 1.18  |
| 3.53 | 10878    | 214.56     | 0.02  |

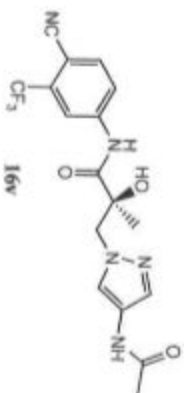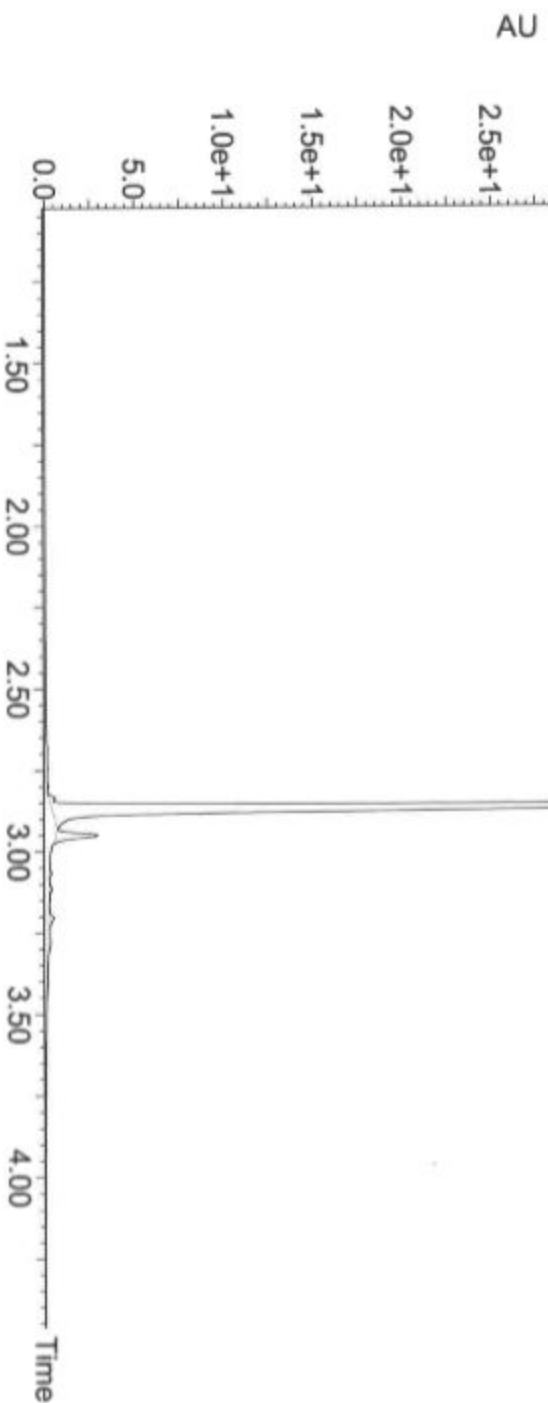

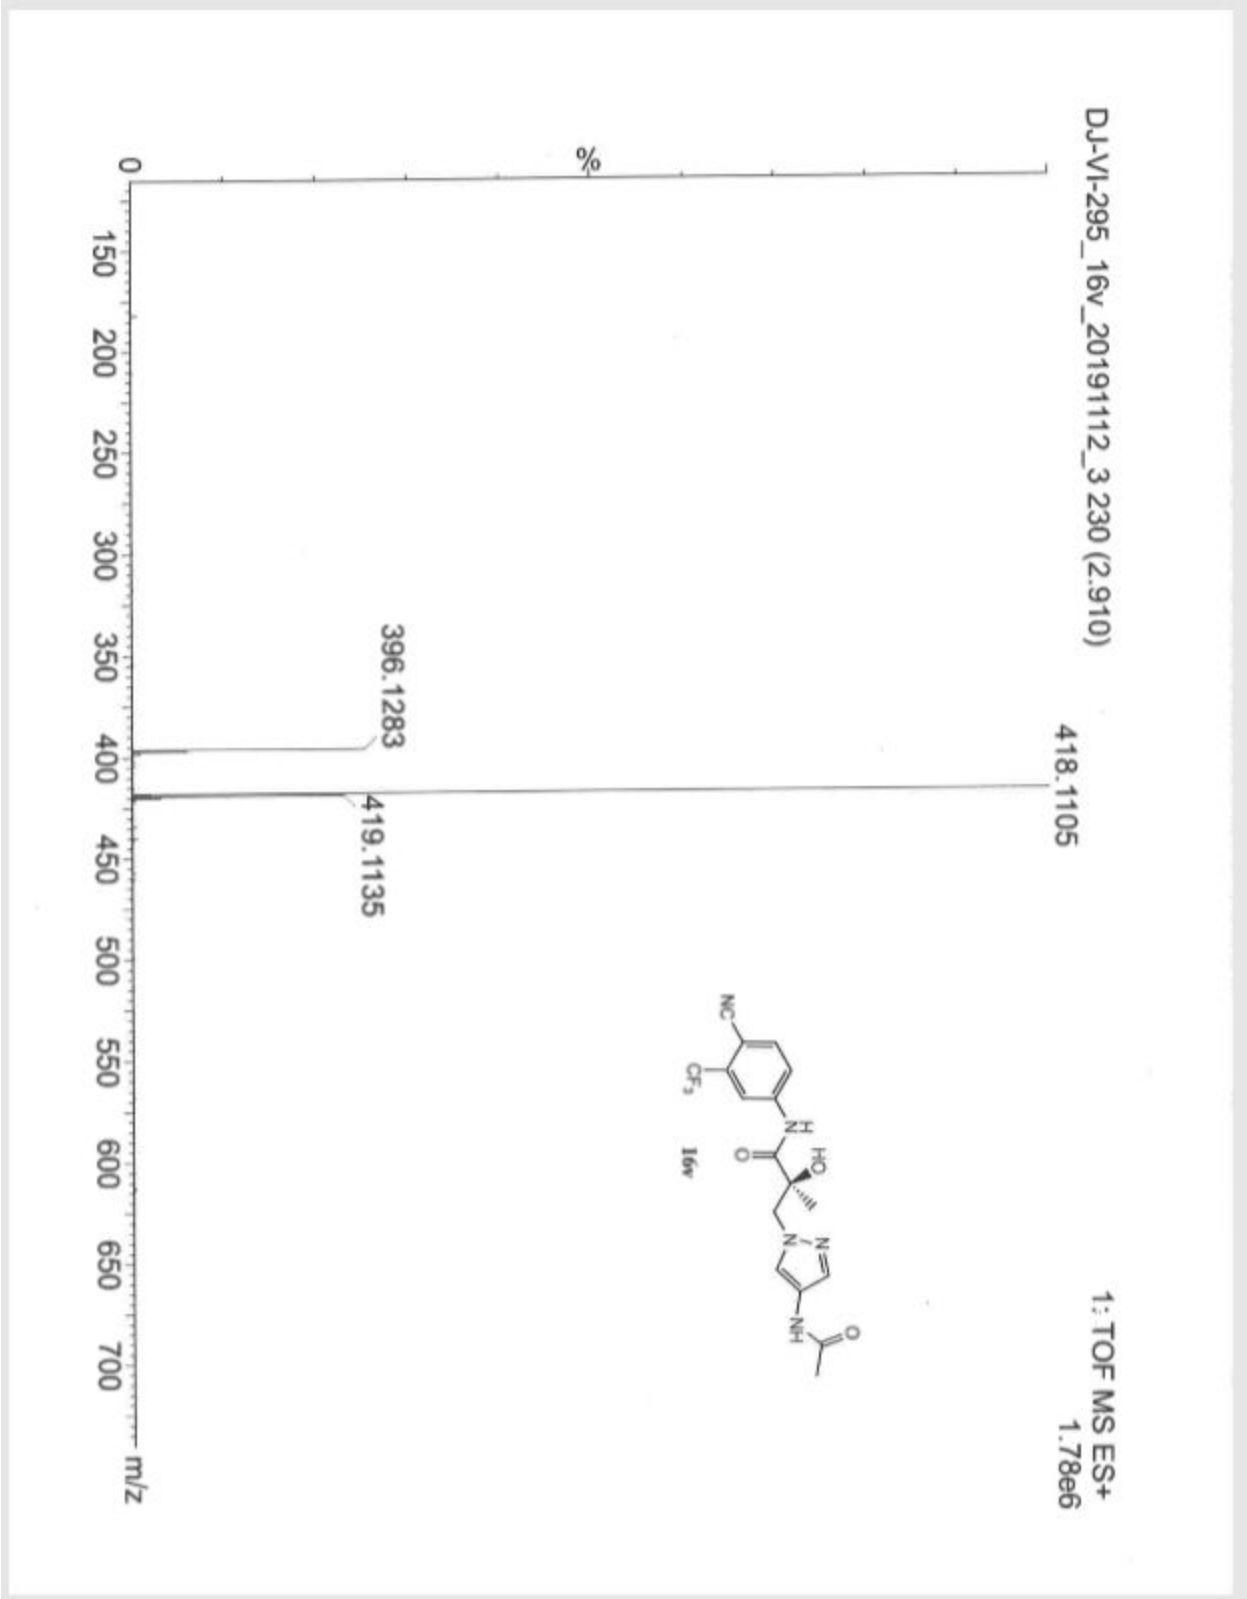



DJ-VII-003\_16x\_20191112\_6

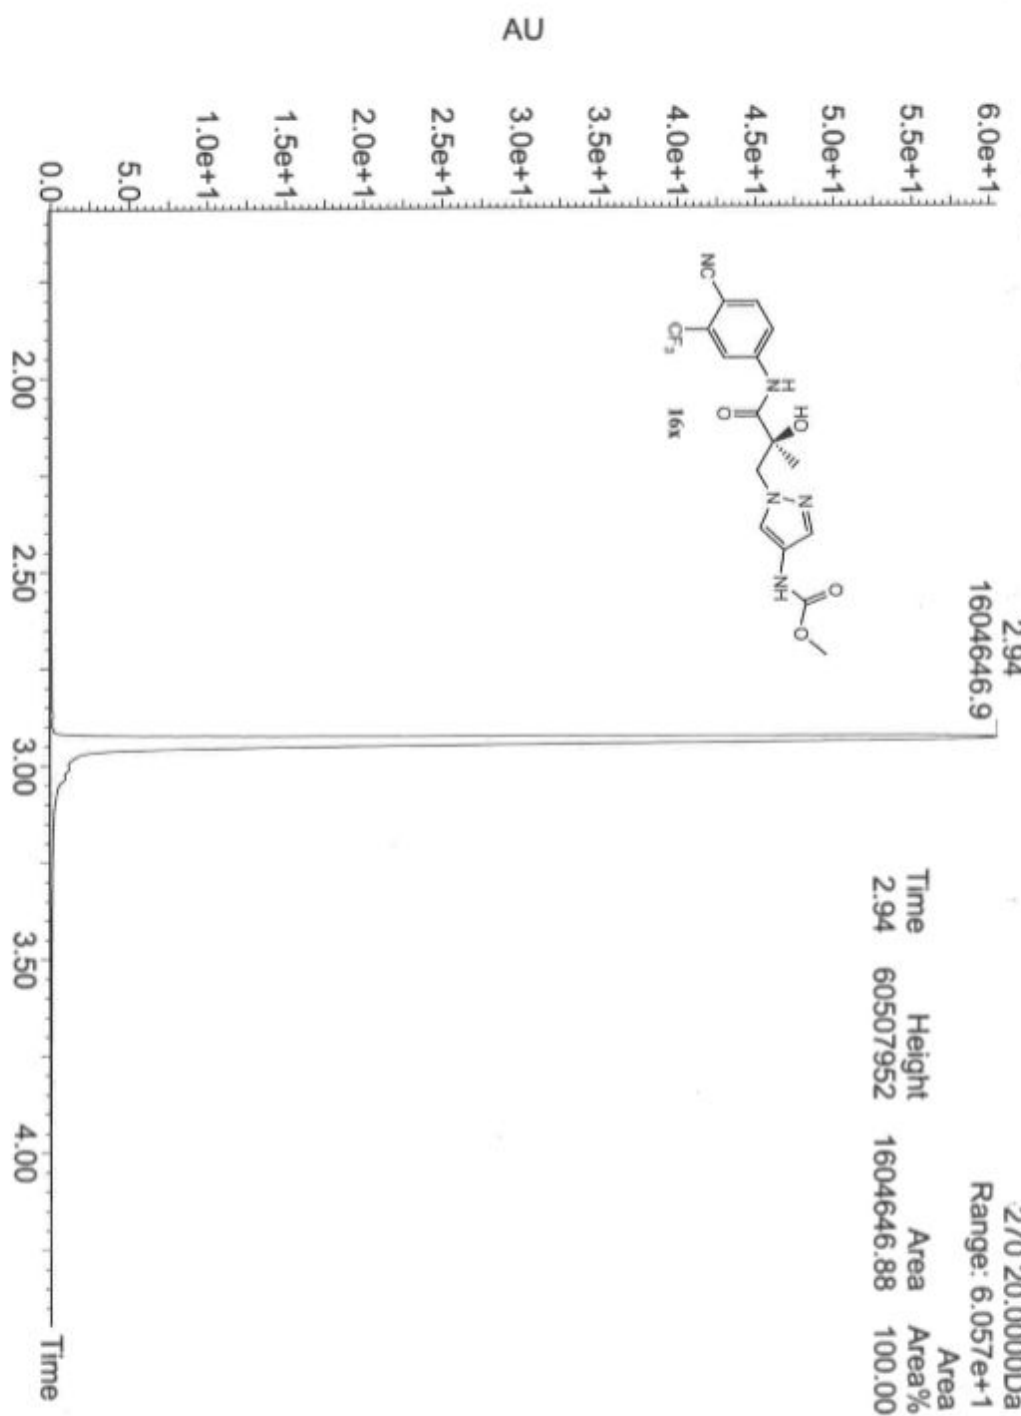

DJ-VII-003\_16x\_20191112\_6 238 (2.990)

434.1056

1: TOF MS ES+  
2.01e6

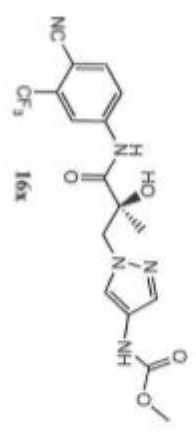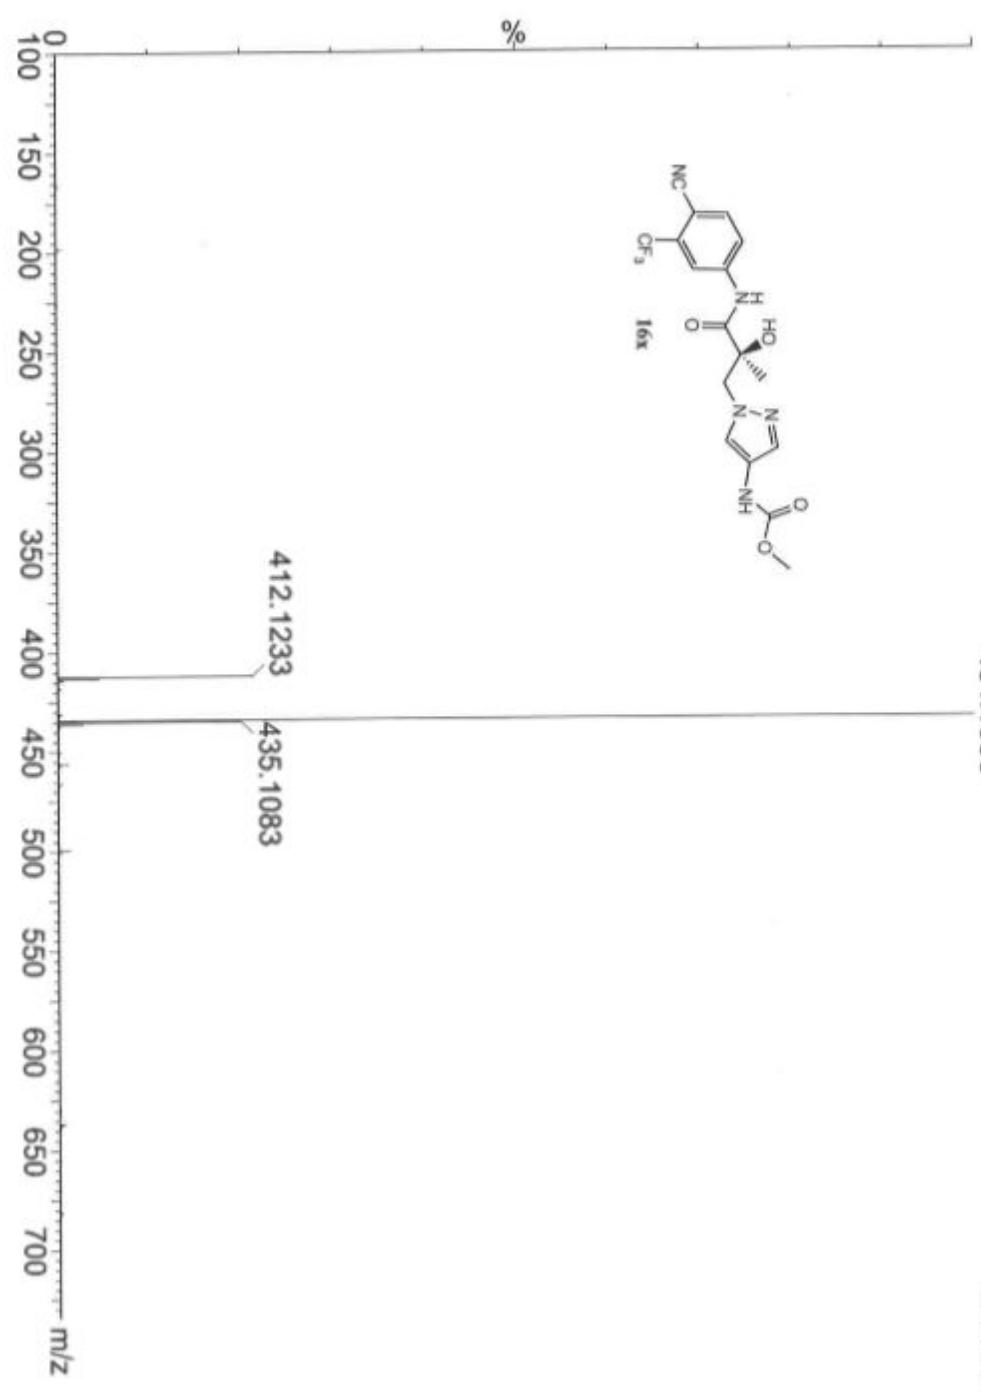

YH-II-151\_20191007\_20

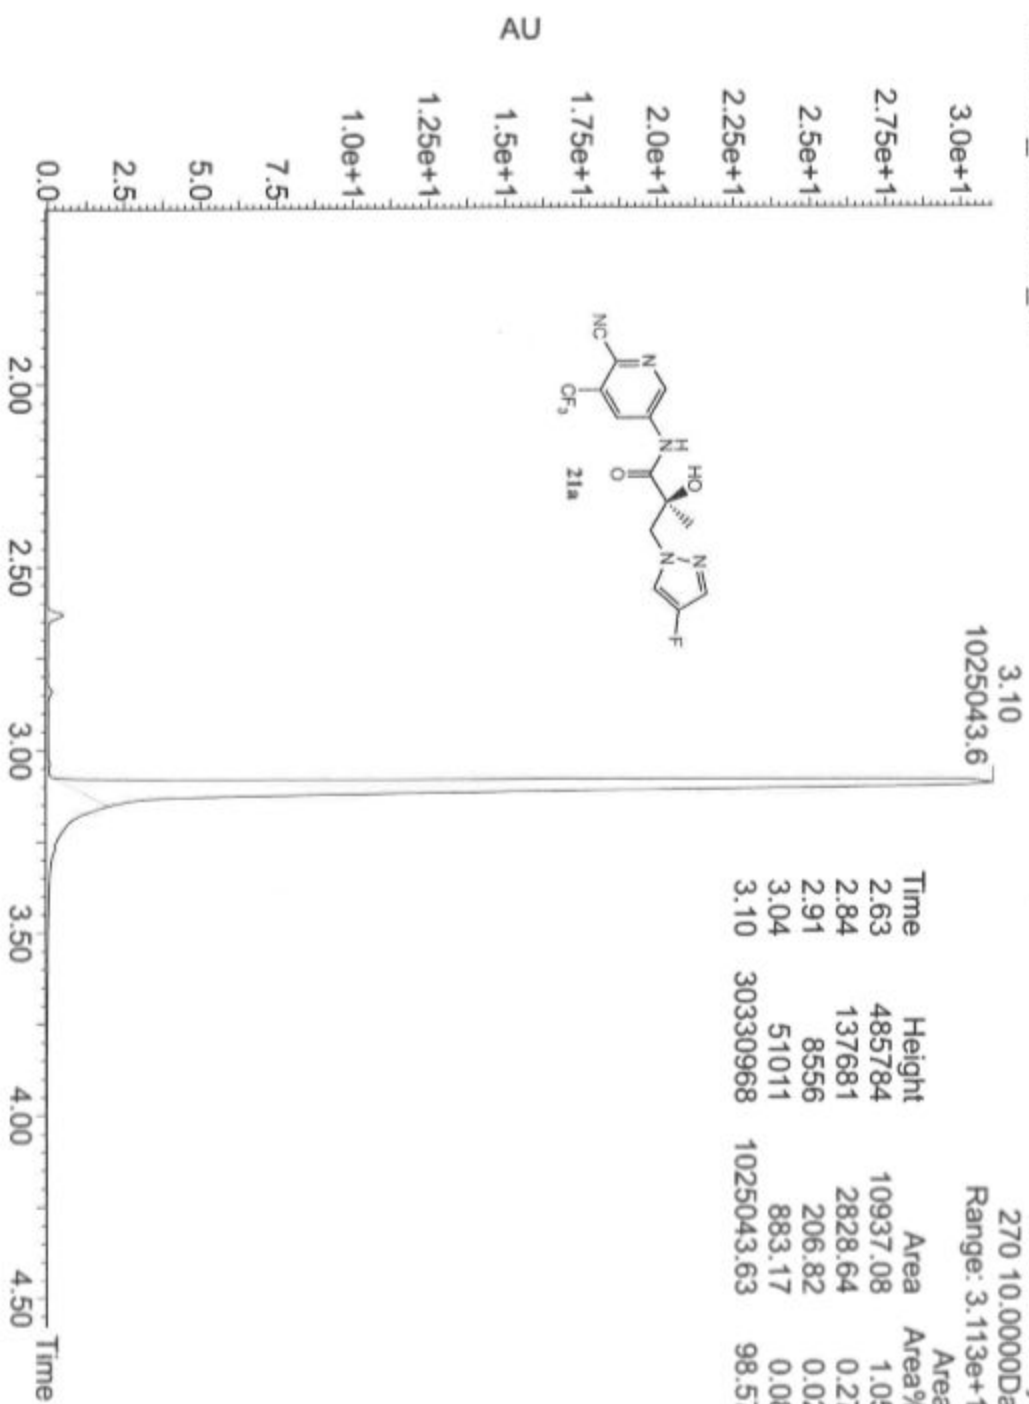

YH-II-151\_20191007\_20 255 (3.147)

1: TOF MS ES+  
1.67e6

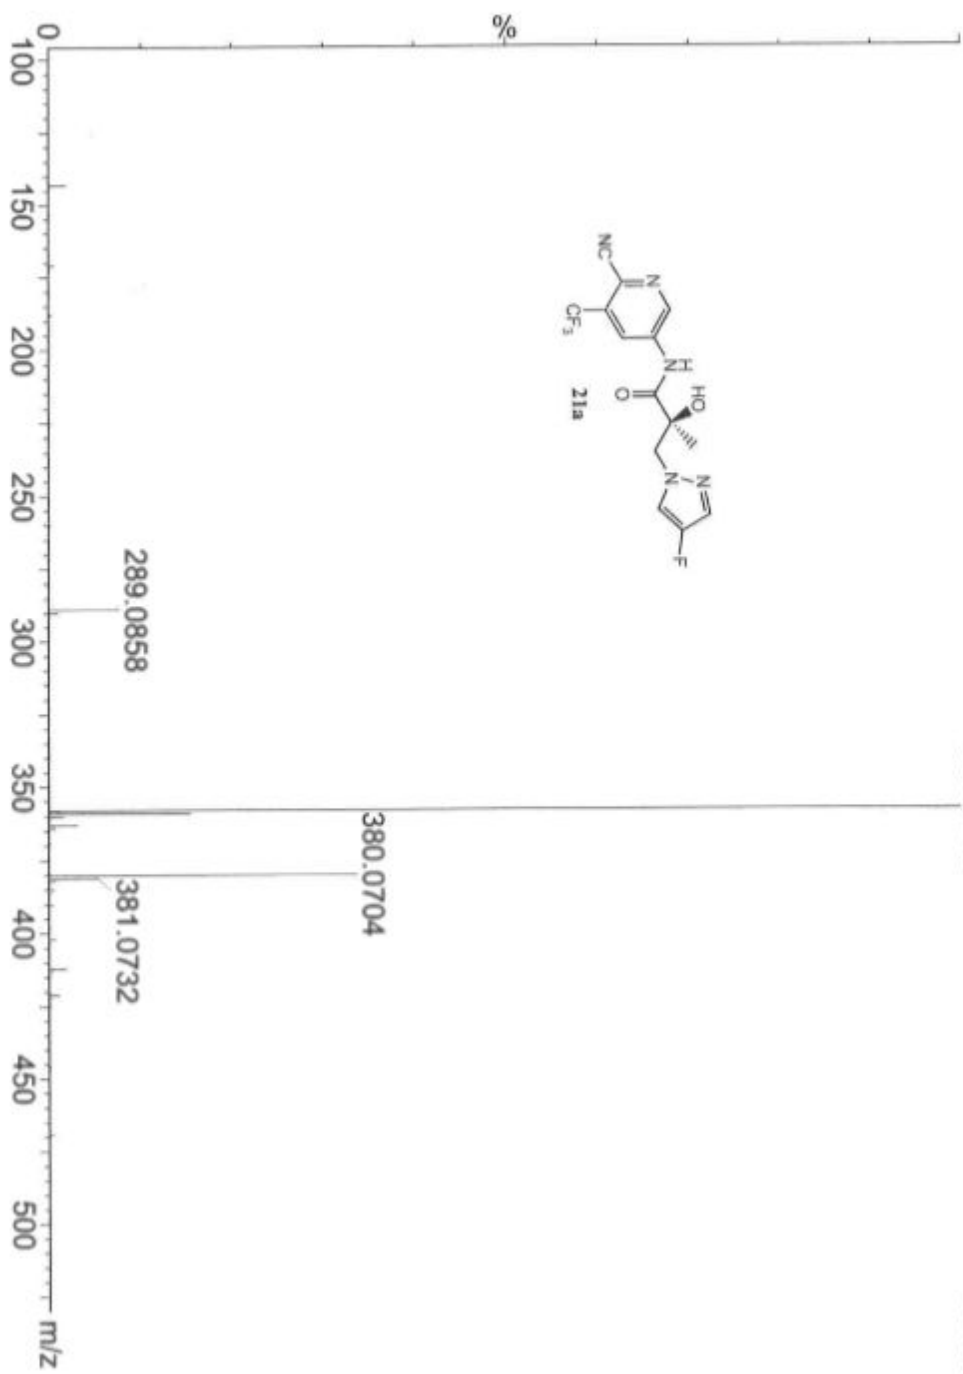

YH-II-215\_20191007\_21

3.21  
576771.4

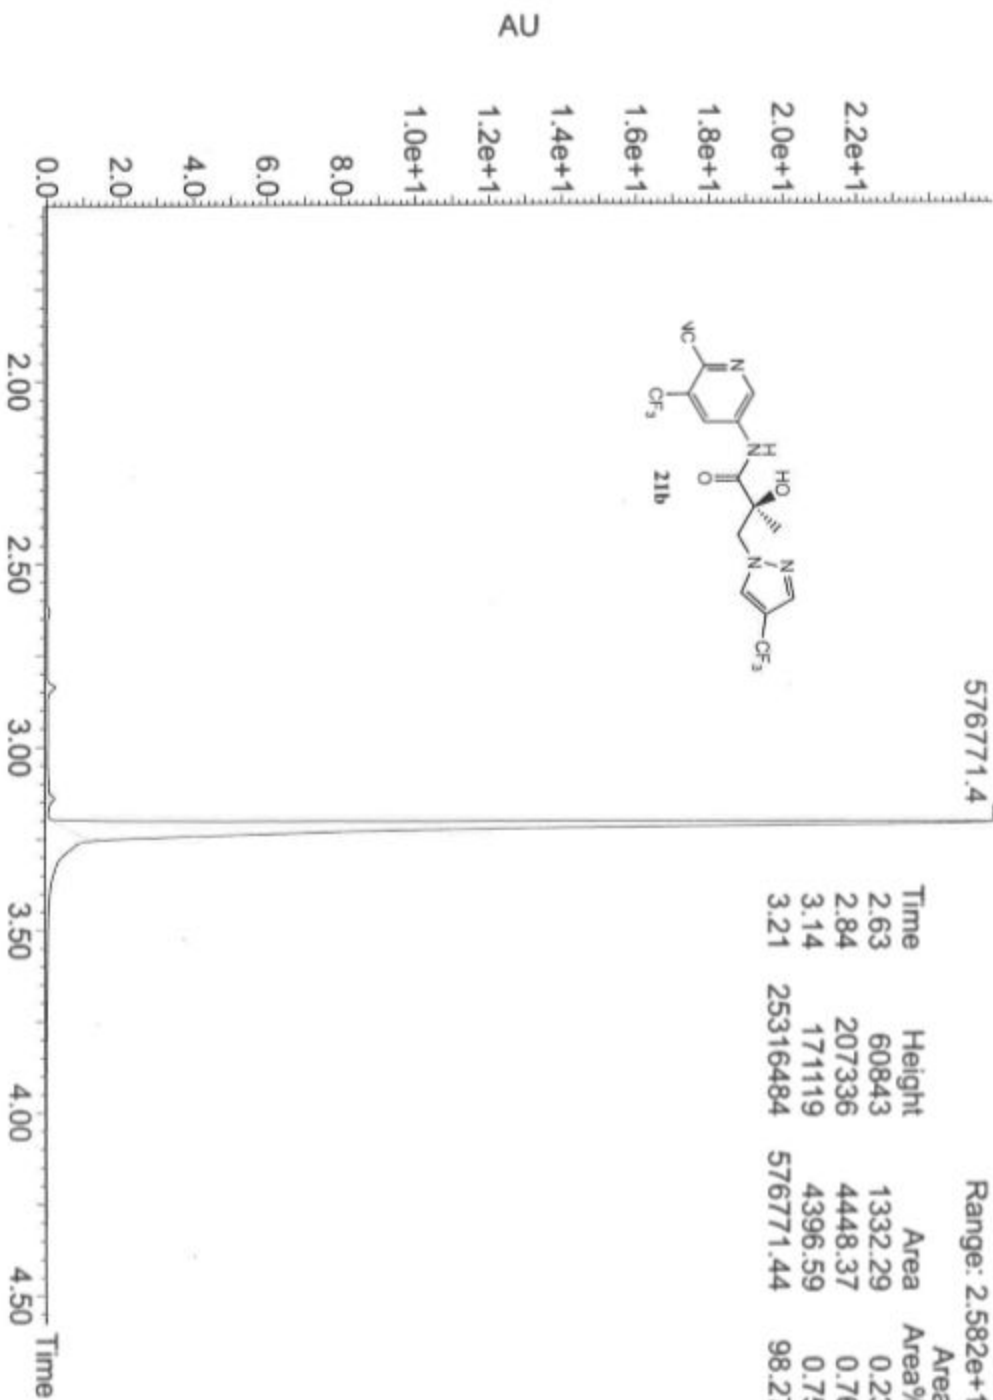

YH-II-215\_20191007\_21 269 (3.267)

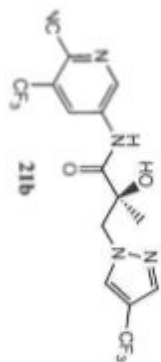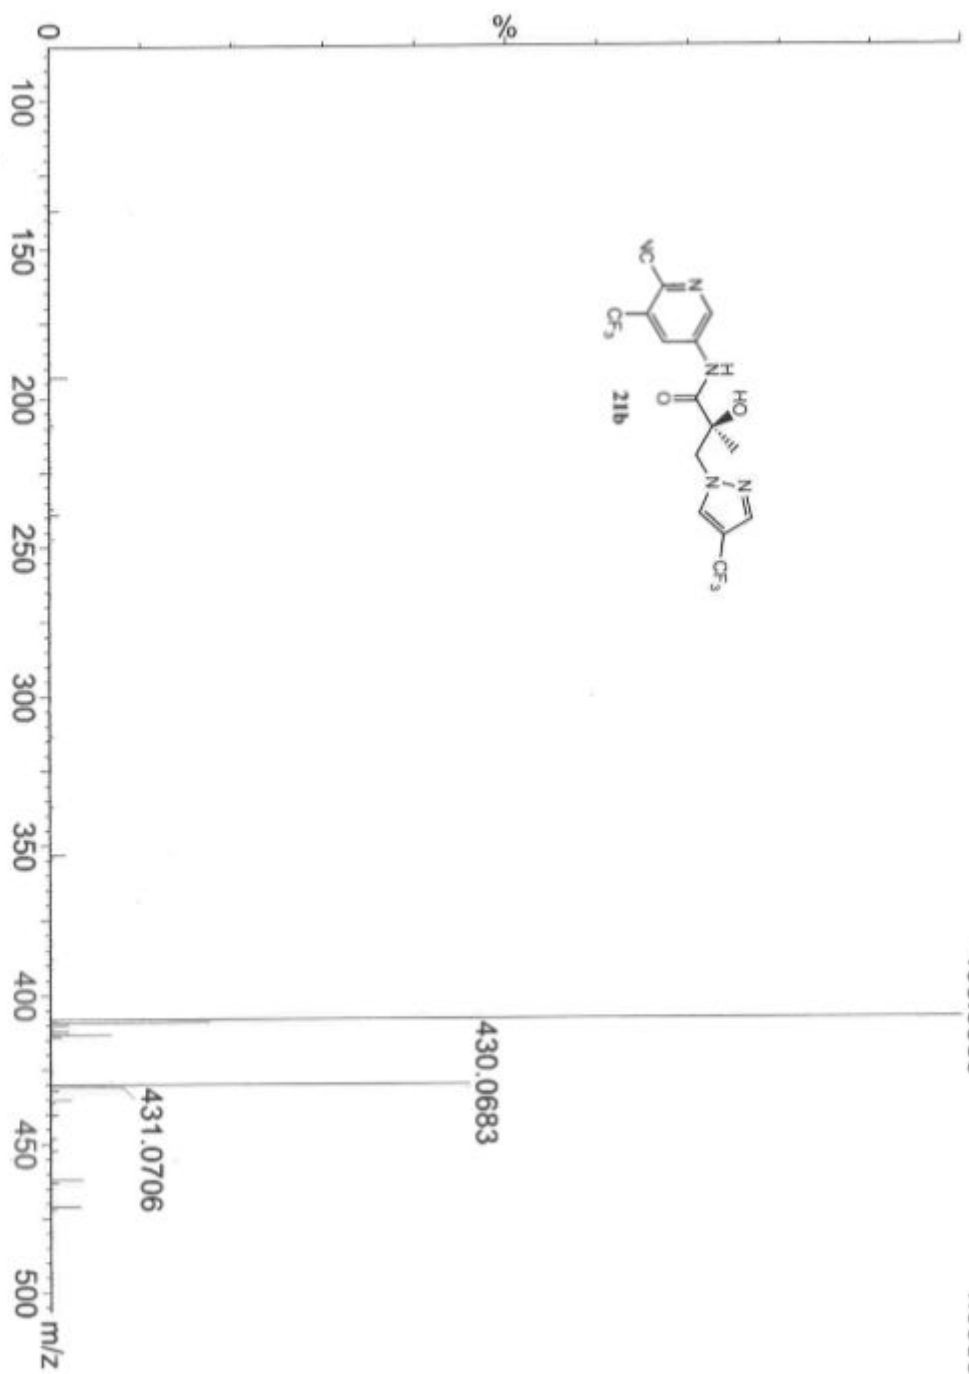

DJ-VII-105\_21c\_20191112\_7

2.97  
1957980.8

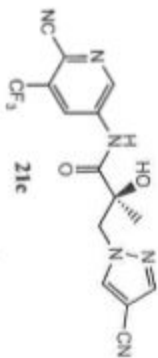

| Time | Height   | Area       | Area% |
|------|----------|------------|-------|
| 2.32 | 230843   | 42442.63   | 2.11  |
| 2.56 | 80705    | 1832.23    | 0.09  |
| 2.77 | 358458   | 5488.17    | 0.27  |
| 2.79 | 237369   | 3509.15    | 0.17  |
| 2.87 | 57791    | 1432.92    | 0.07  |
| 2.97 | 60792188 | 1957980.75 | 97.28 |

3: Diode Array  
280 20,000Da  
Range: 6.162e+1

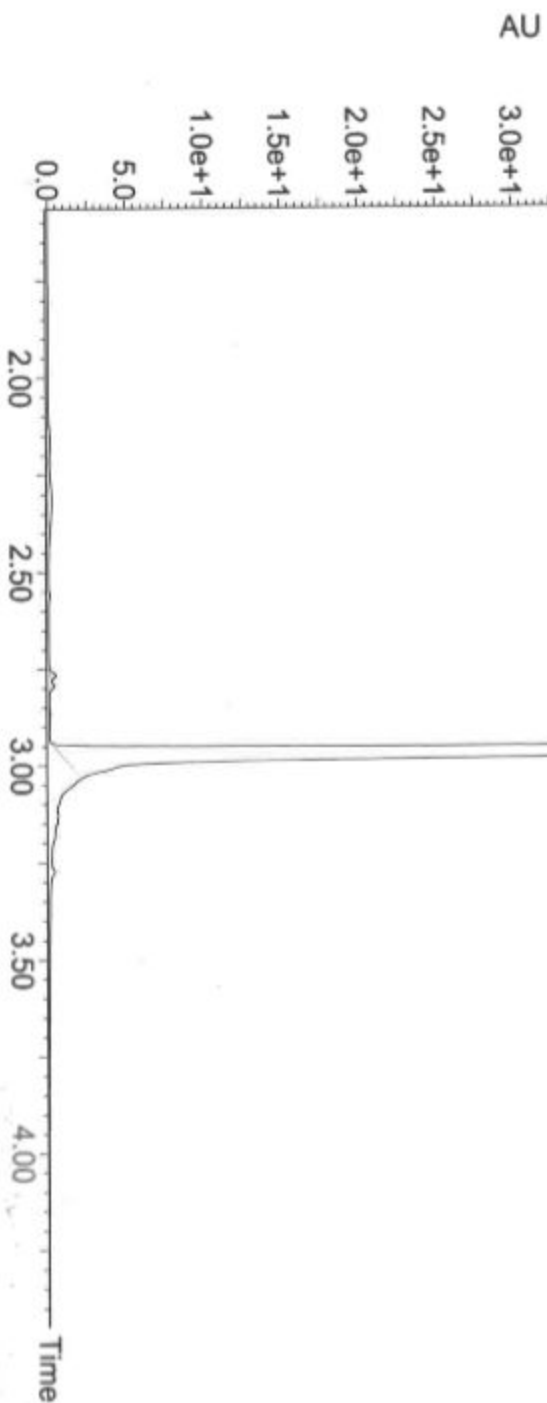

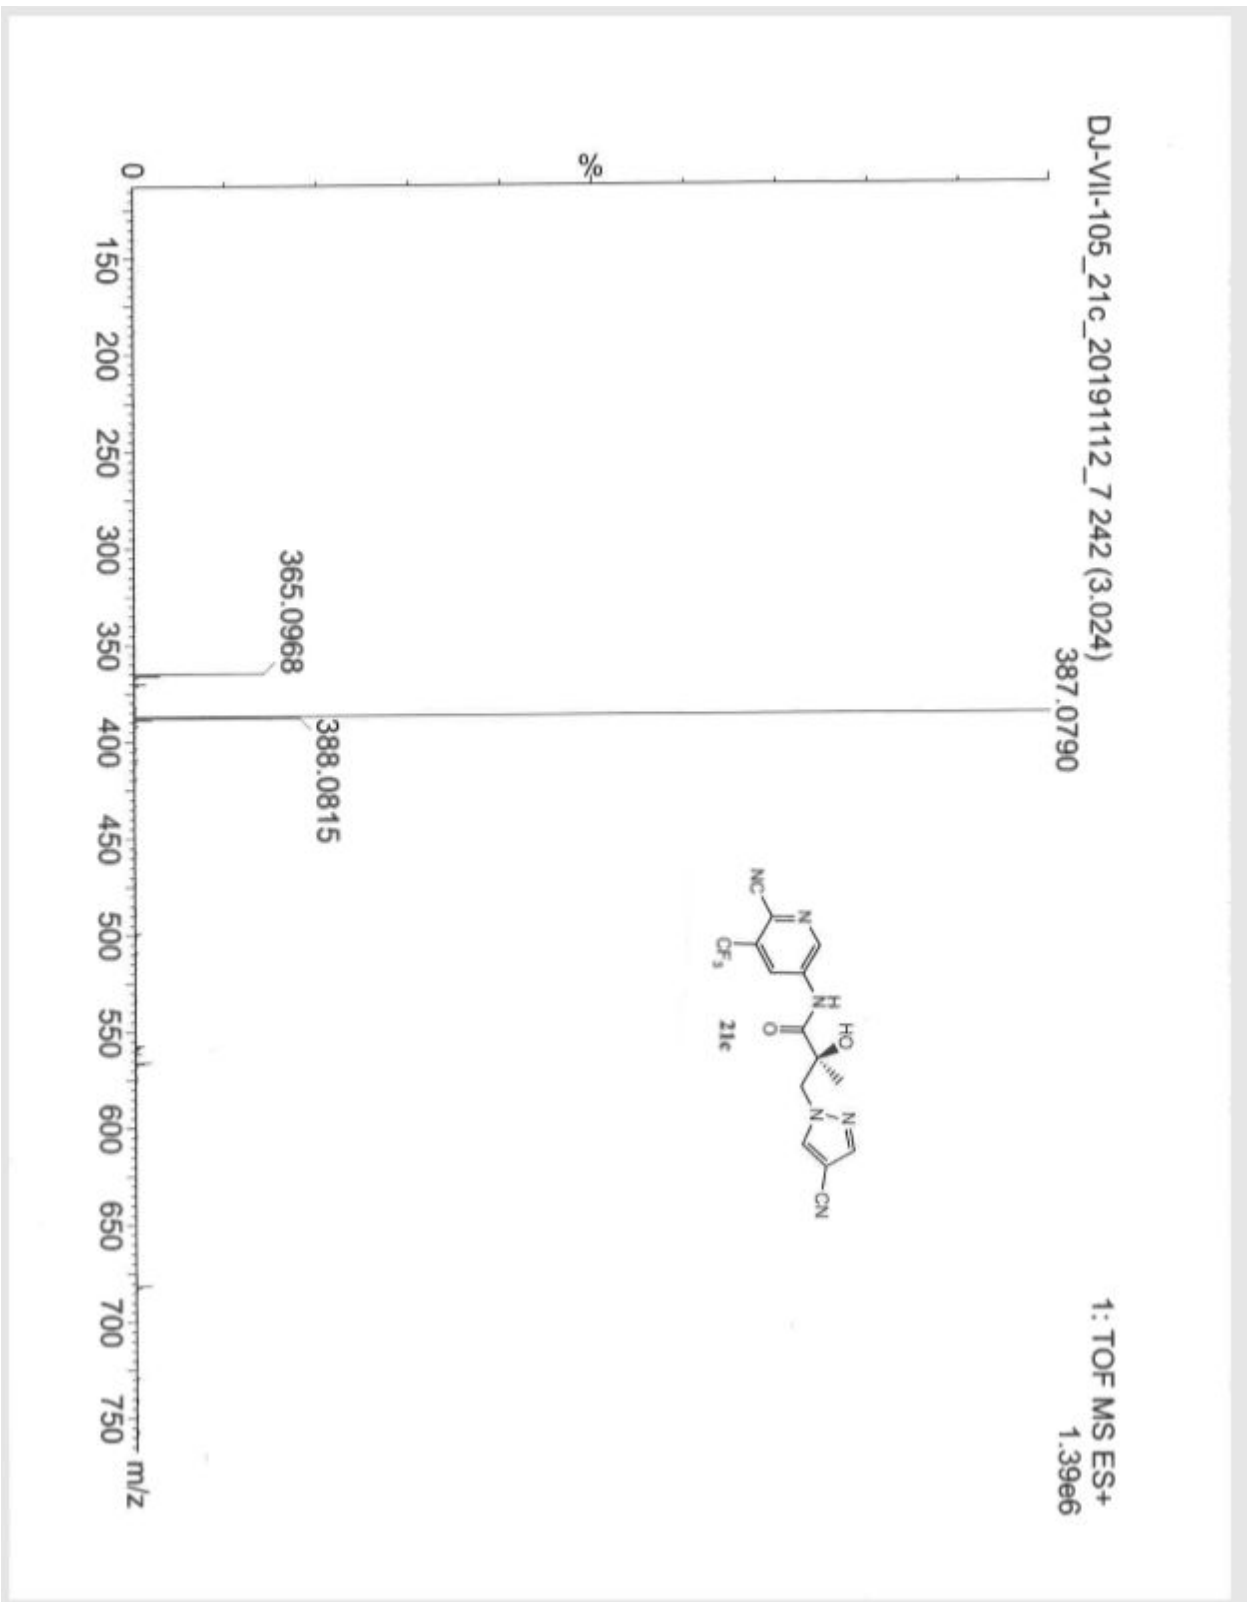



DJ-VI-297\_21d\_20191112\_8

3.18  
1996674.5

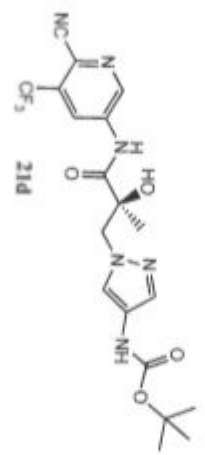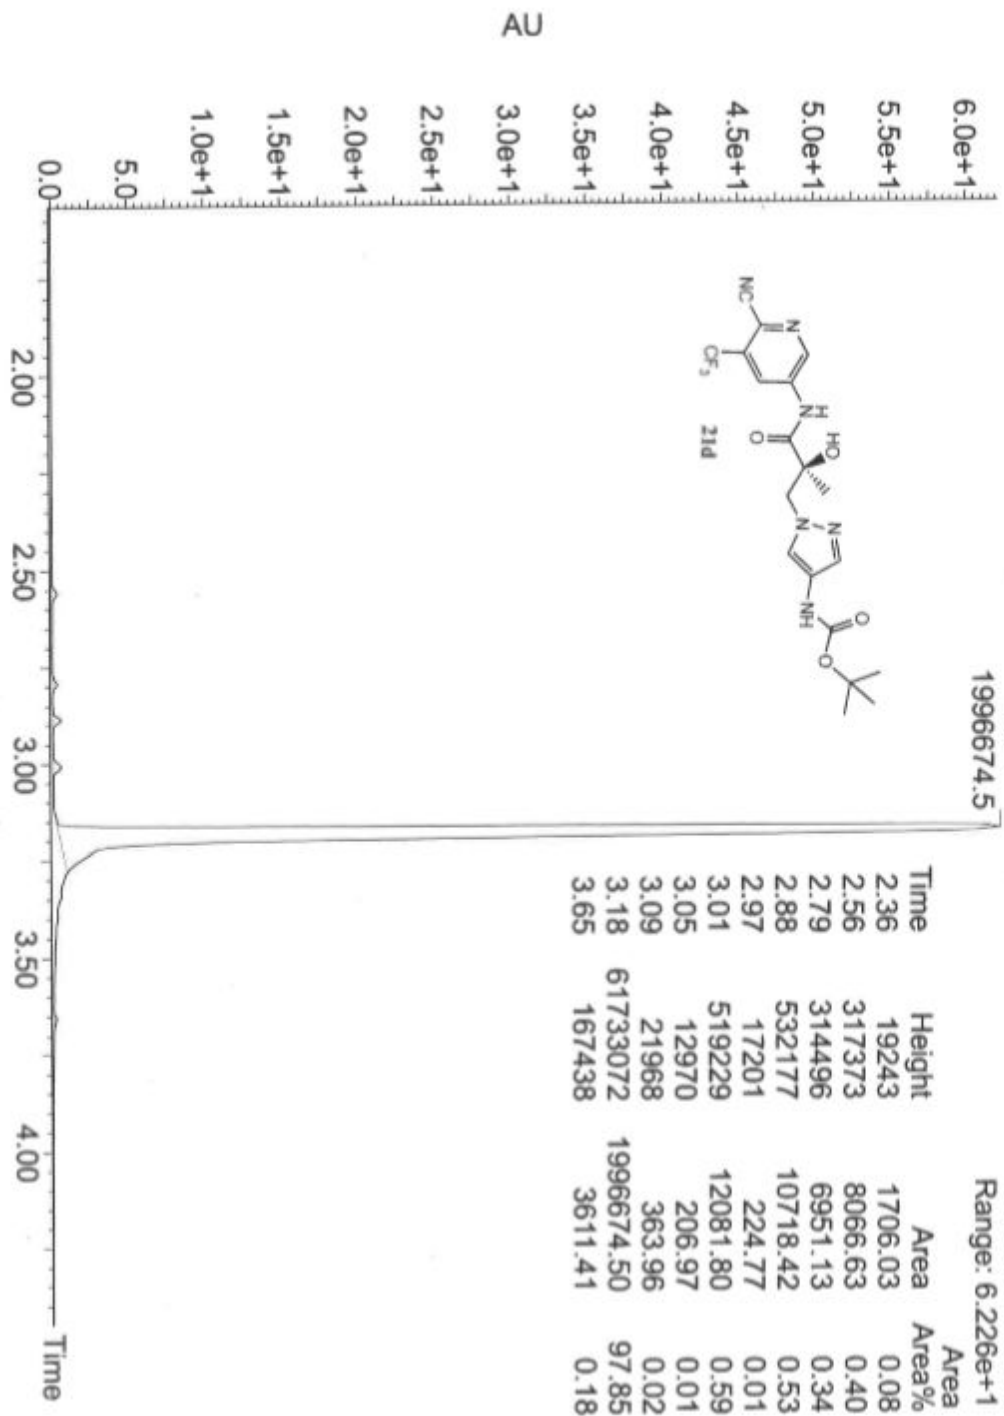

DJ-VI-297\_21d\_20191112\_8 268 (3.258)

1: TOF MS ES+  
1.93e6

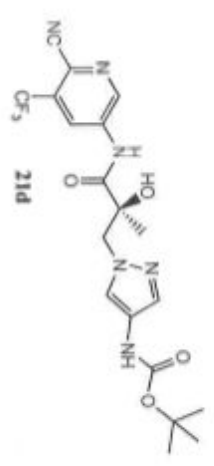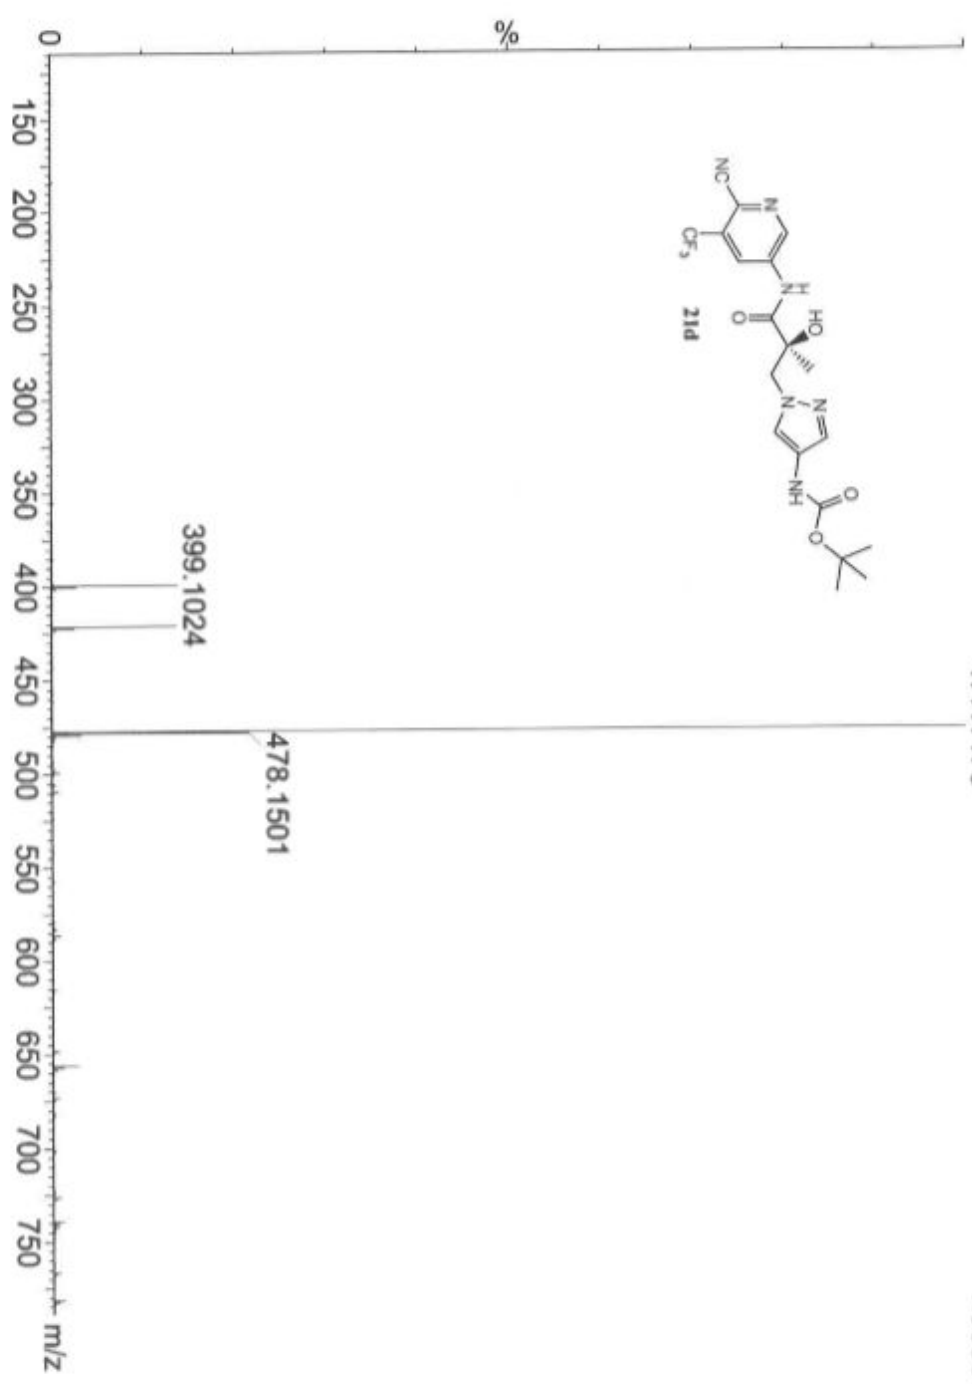

DJ-VI-167\_21e\_20191112\_9

3.01  
1386882.5

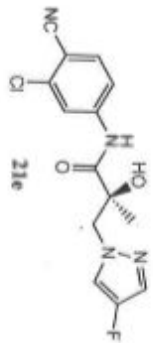

3: Diode Array  
270 20.0000Da  
Range: 5.866e+1

| Time | Height   | Area       | Area% |
|------|----------|------------|-------|
| 2.45 | 13673    | 418.50     | 0.03  |
| 2.67 | 626295   | 13909.33   | 0.98  |
| 2.78 | 385019   | 7924.19    | 0.56  |
| 2.85 | 10133    | 182.50     | 0.01  |
| 2.91 | 236846   | 5660.67    | 0.40  |
| 2.95 | 182382   | 3262.67    | 0.23  |
| 3.01 | 57997016 | 1386882.50 | 97.79 |

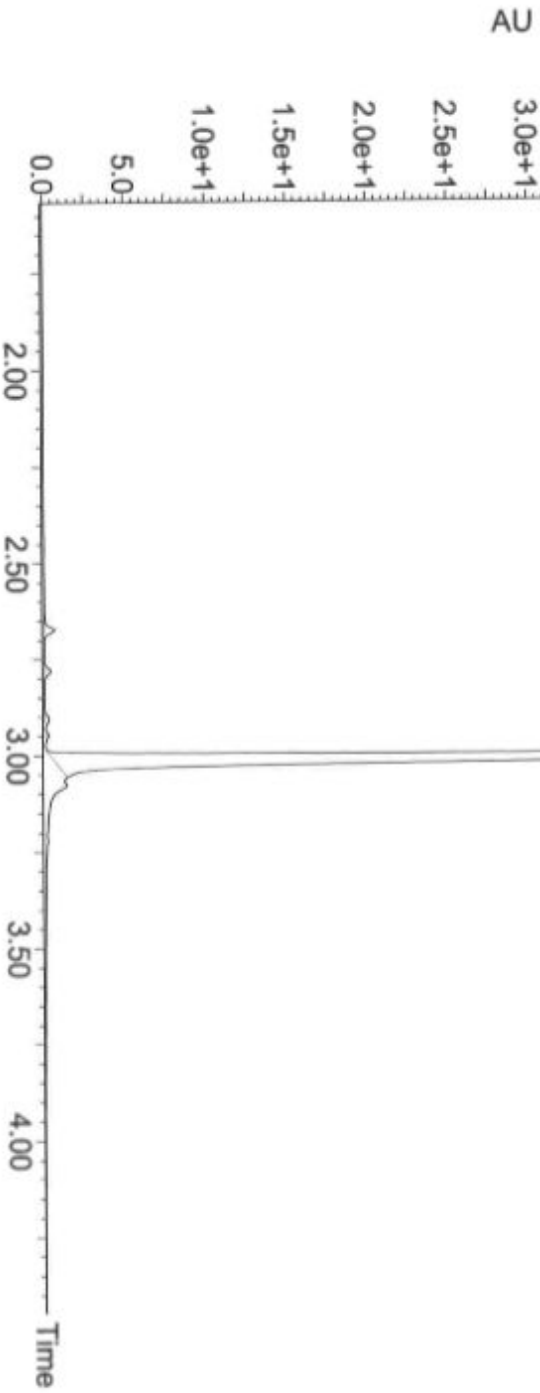

DJ-VI-167\_21e\_20191112\_9 248 (3.075)  
345.0531

1: TOF MS ES+  
3.99e5

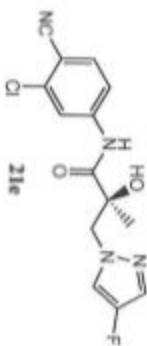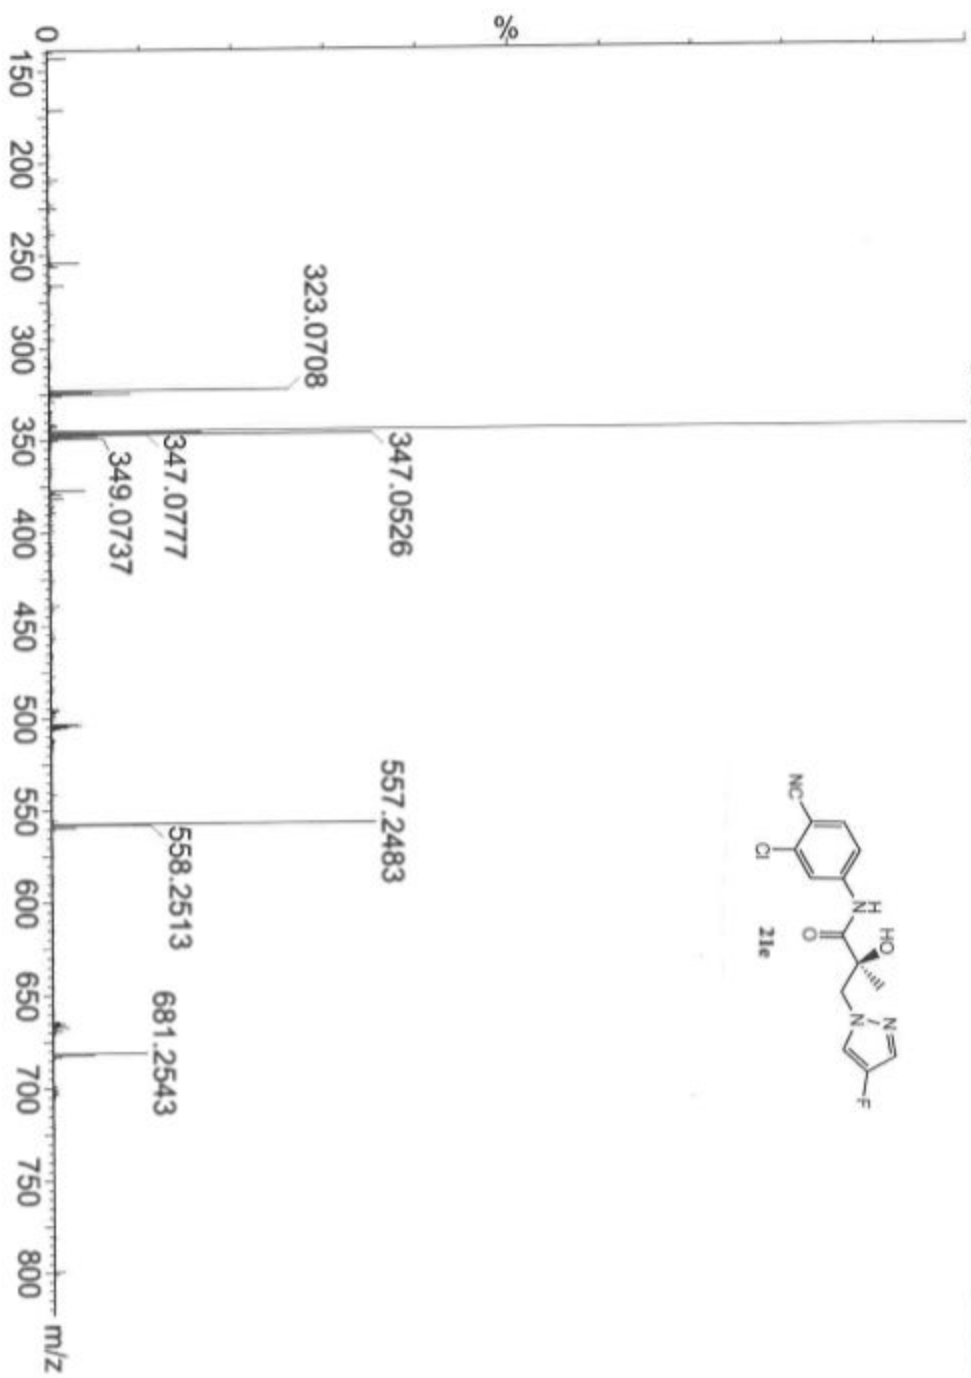

DJ-VII-23\_21f\_20191112\_10

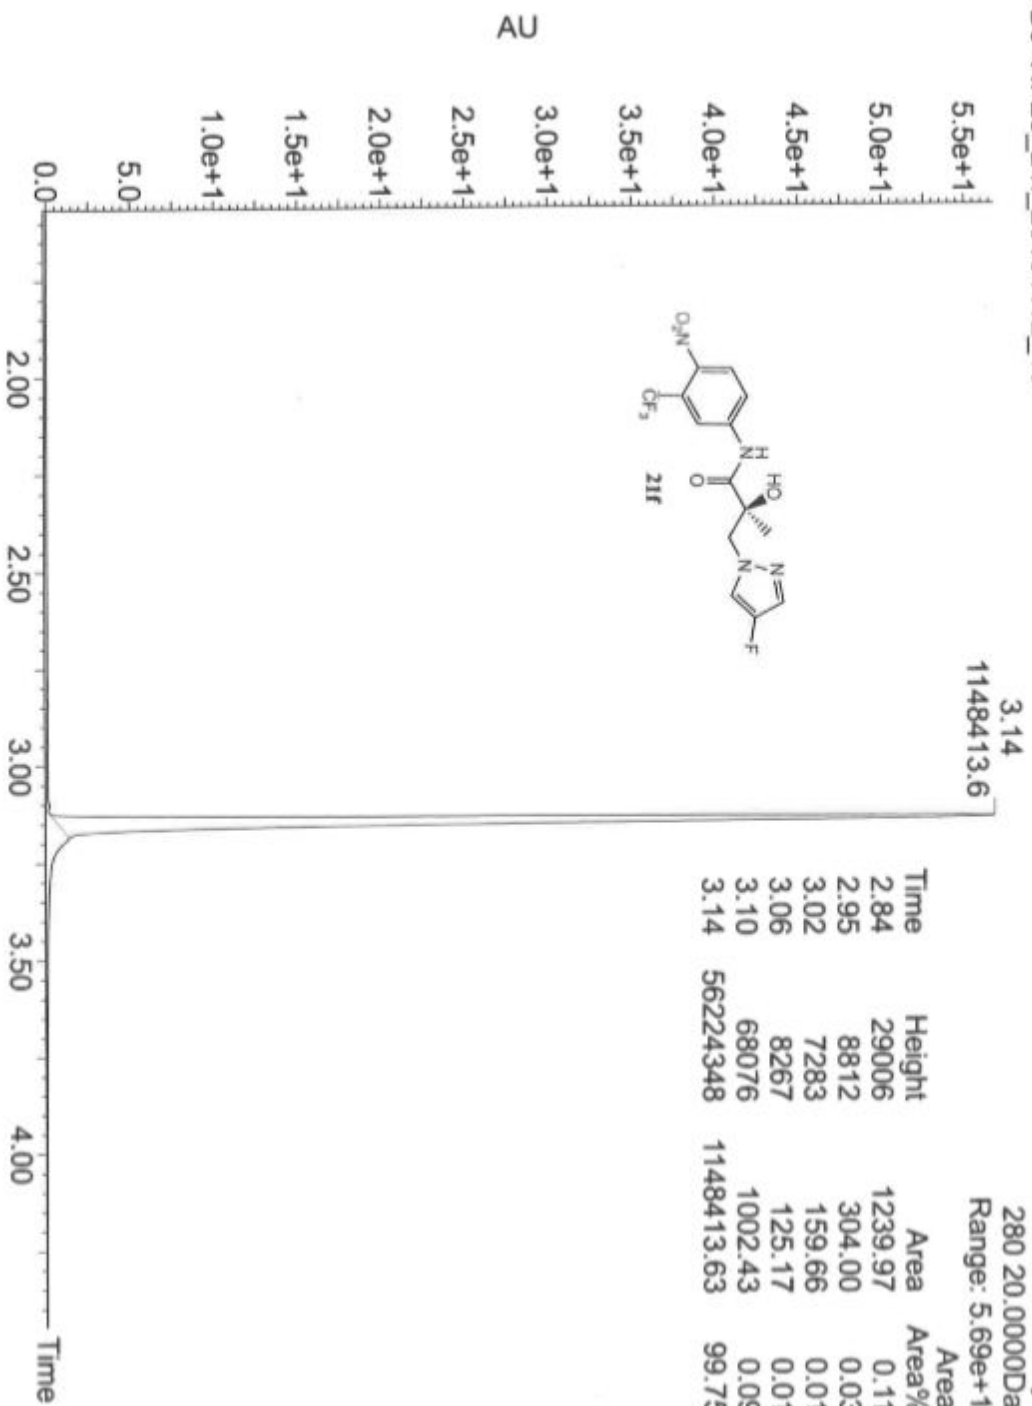

DJ-VII-23\_21f\_20191112\_10 264 (3.224)

465.0906

1: TOF MS ES+  
1.02e6

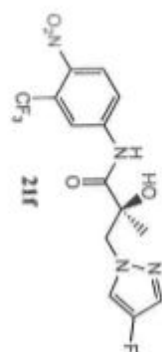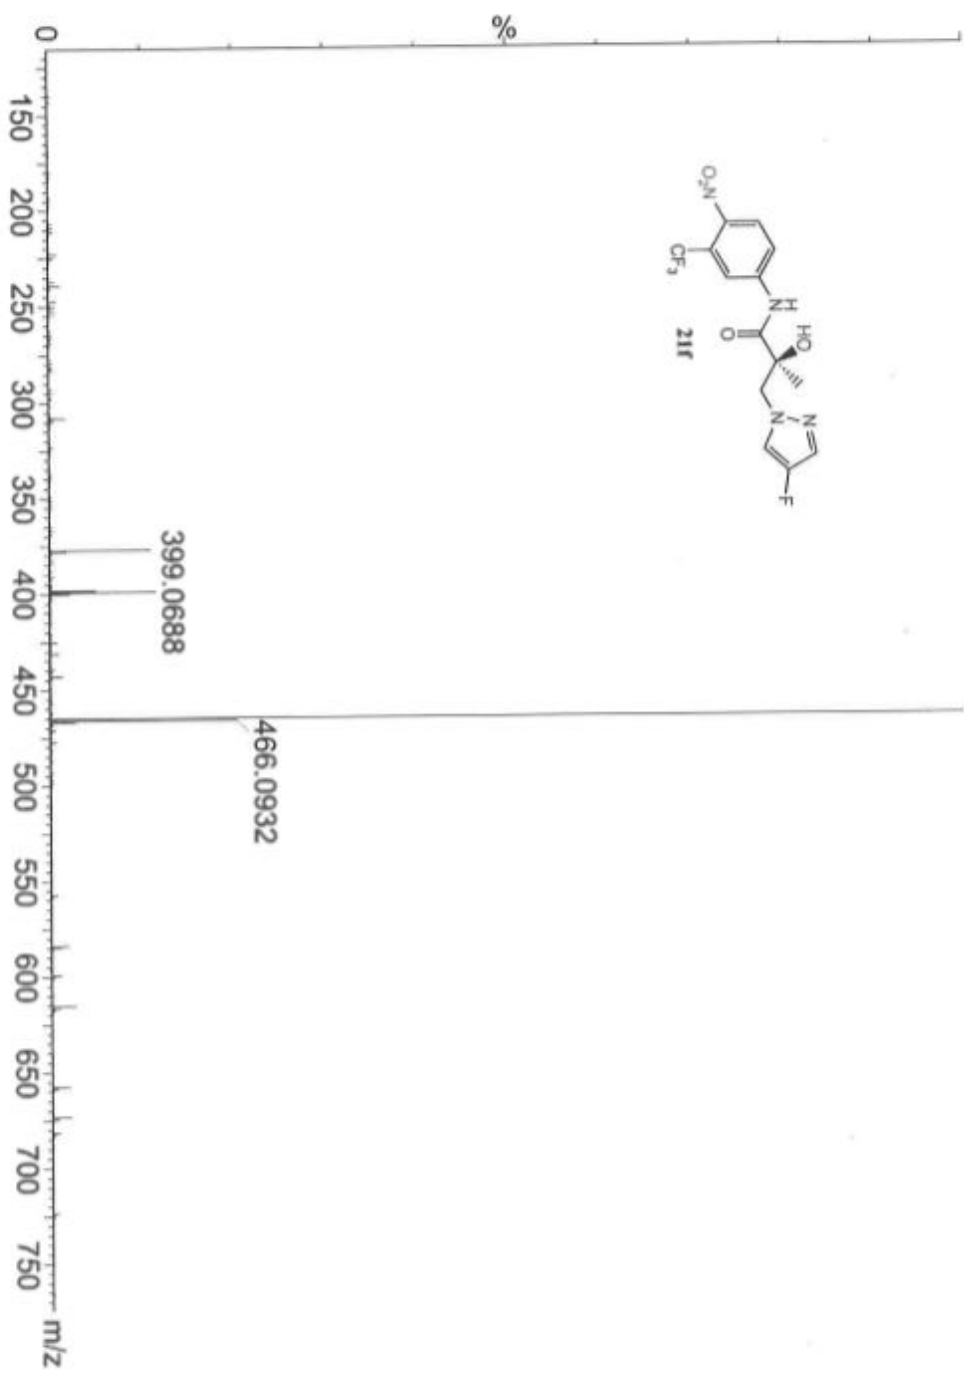

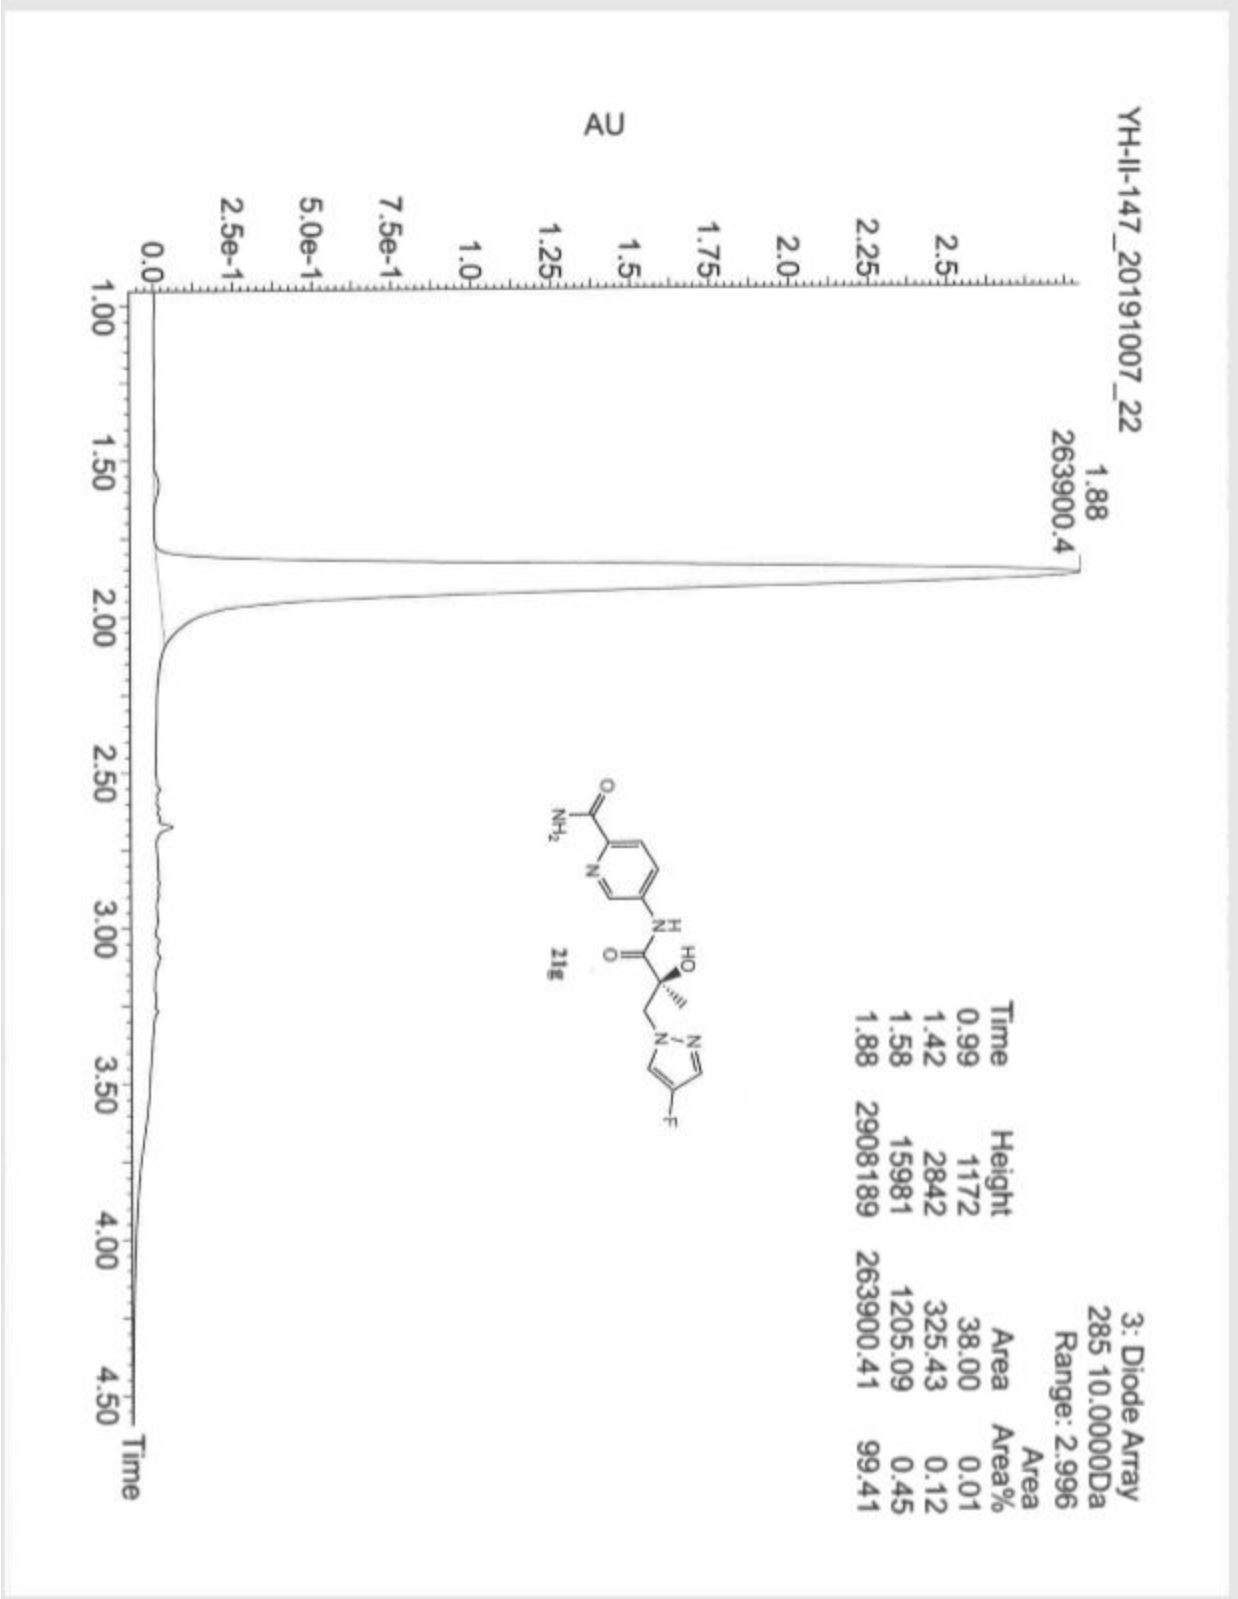

YH-II-147\_20191007\_22 123 (1.923)

308.1118

1: TOF MS ES+  
1.17e6

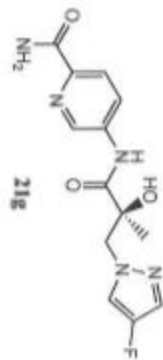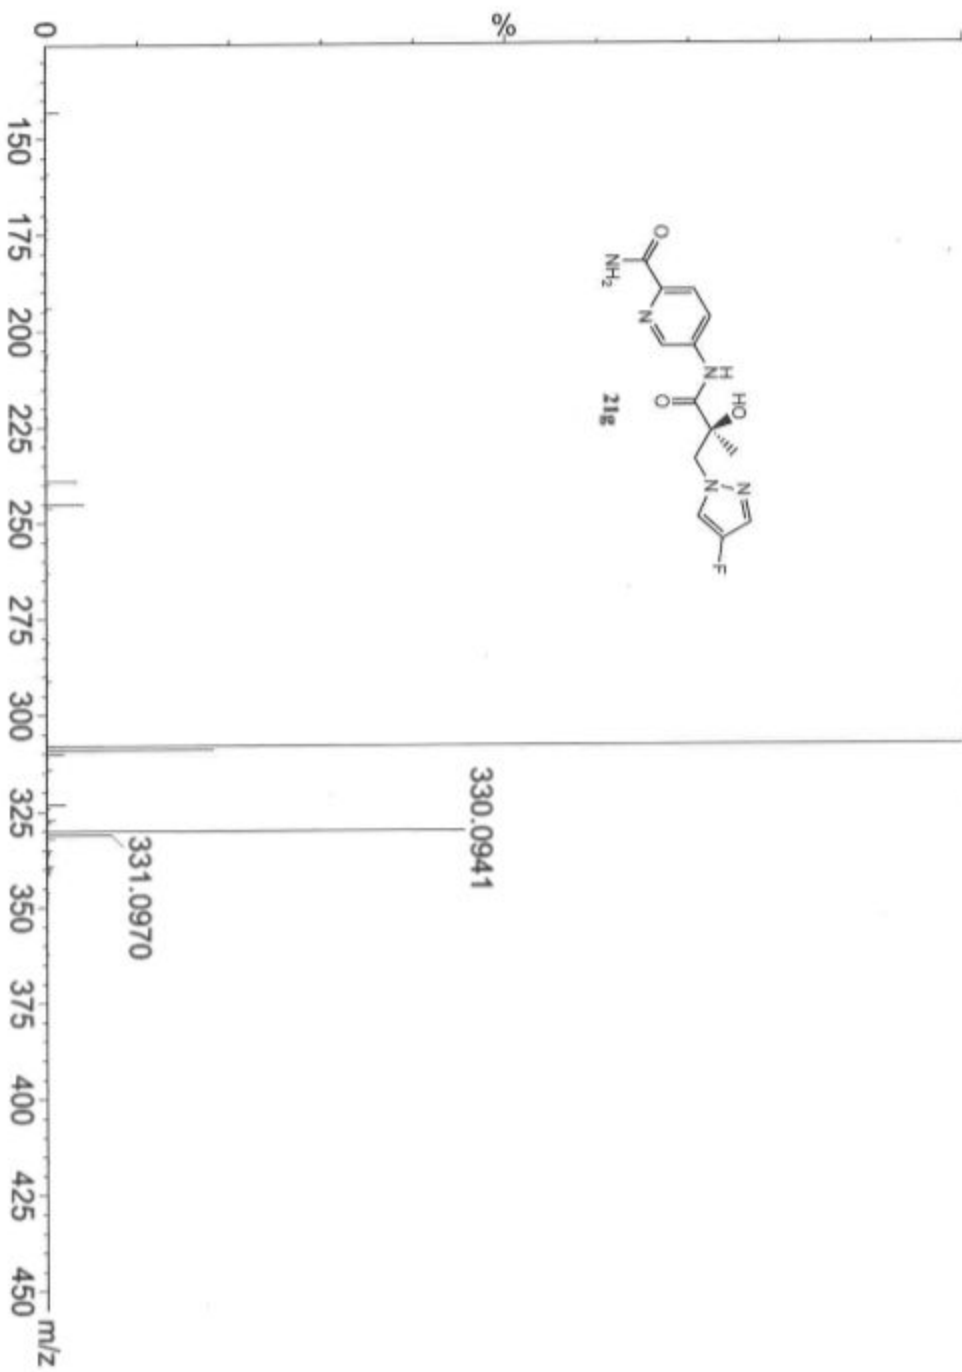



YH-II-155B\_20191007\_23

2.64  
944642.4

| Time | Height   | Area      | Area% |
|------|----------|-----------|-------|
| 1.97 | 6719     | 1505.61   | 0.15  |
| 2.56 | 1115472  | 22924.21  | 2.32  |
| 2.64 | 32037954 | 944642.38 | 95.40 |
| 2.79 | 703574   | 15173.43  | 1.53  |
| 2.84 | 129990   | 2182.33   | 0.22  |
| 2.93 | 8380     | 185.15    | 0.02  |
| 3.09 | 58335    | 2744.02   | 0.28  |
| 4.00 | 30184    | 843.22    | 0.09  |

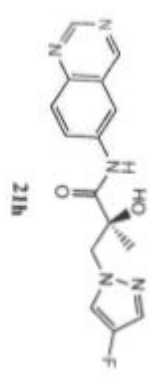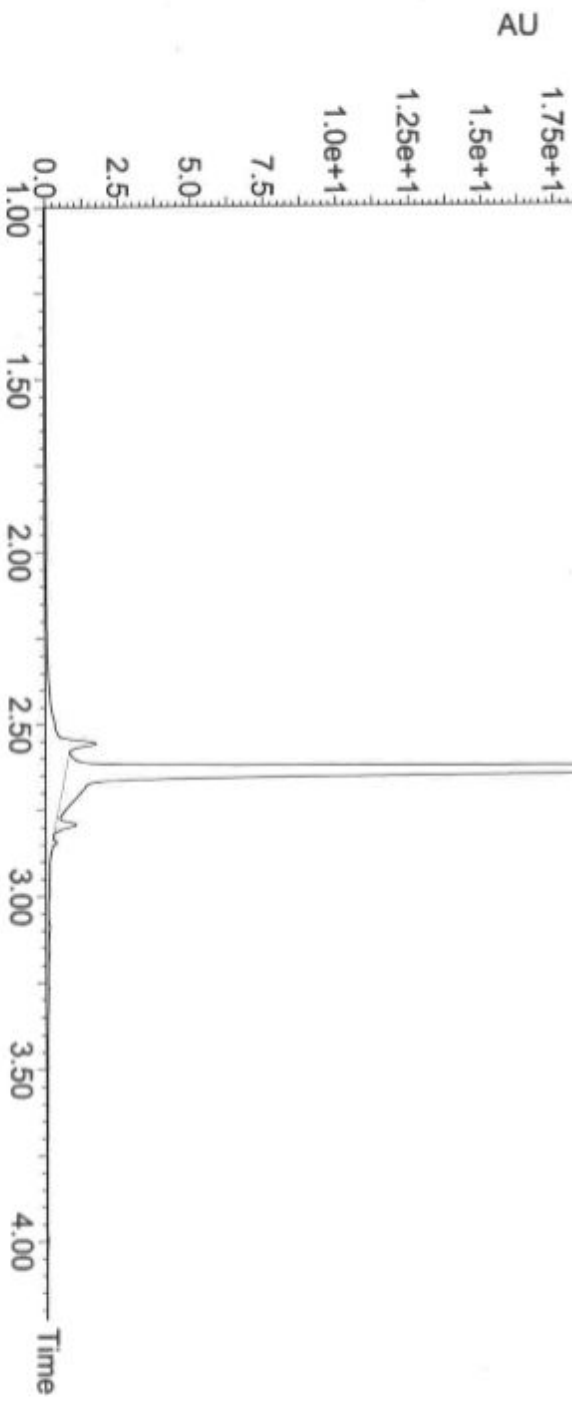

3: Diode Array  
252 10.0000Da  
Range: 3.272e+1

YH-II-155B\_20191007\_23 204 (2.675)

1: TOF MS ES+  
2.81e6

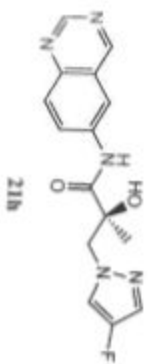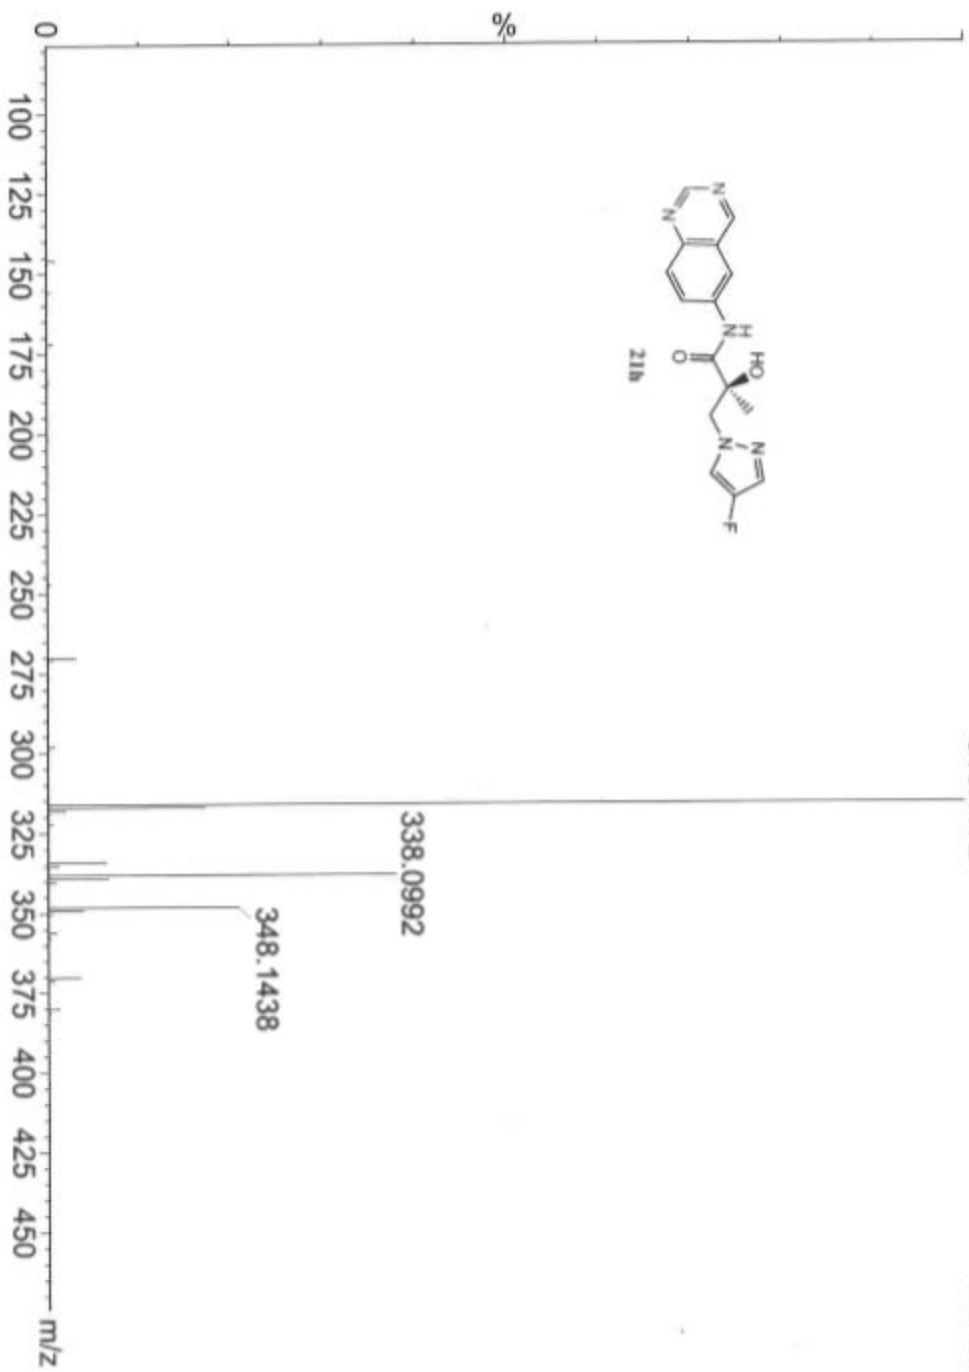

DJ-VII-17\_211\_20191112\_11

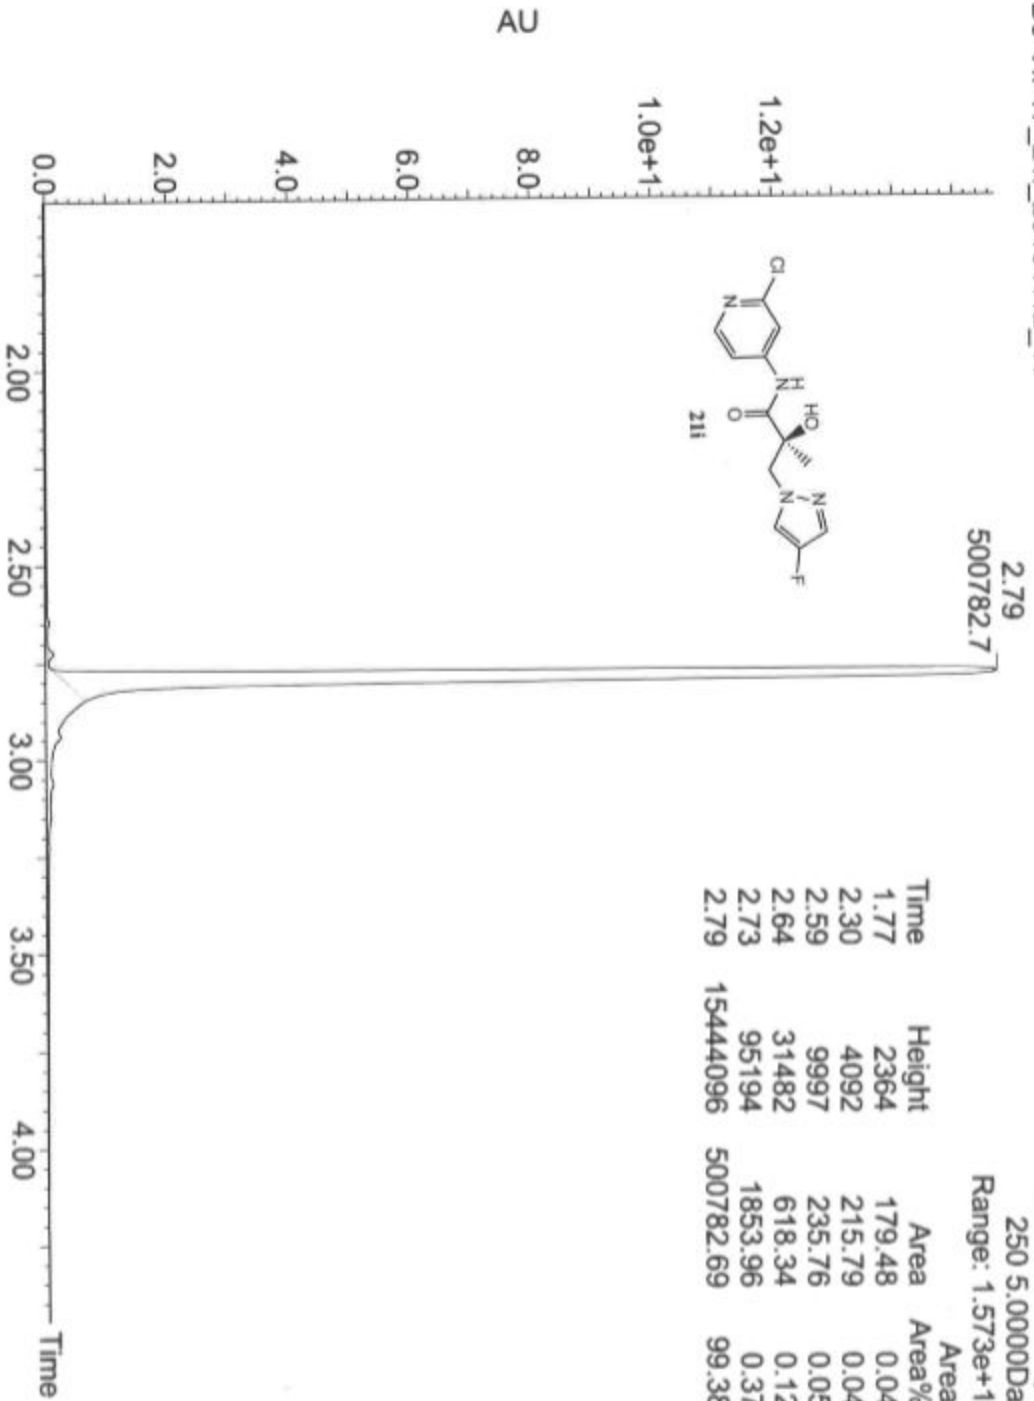

DJ-VII-17\_21i\_20191112\_11 222 (2.841)  
321.0530

1: TOF MS ES+  
6.28e5

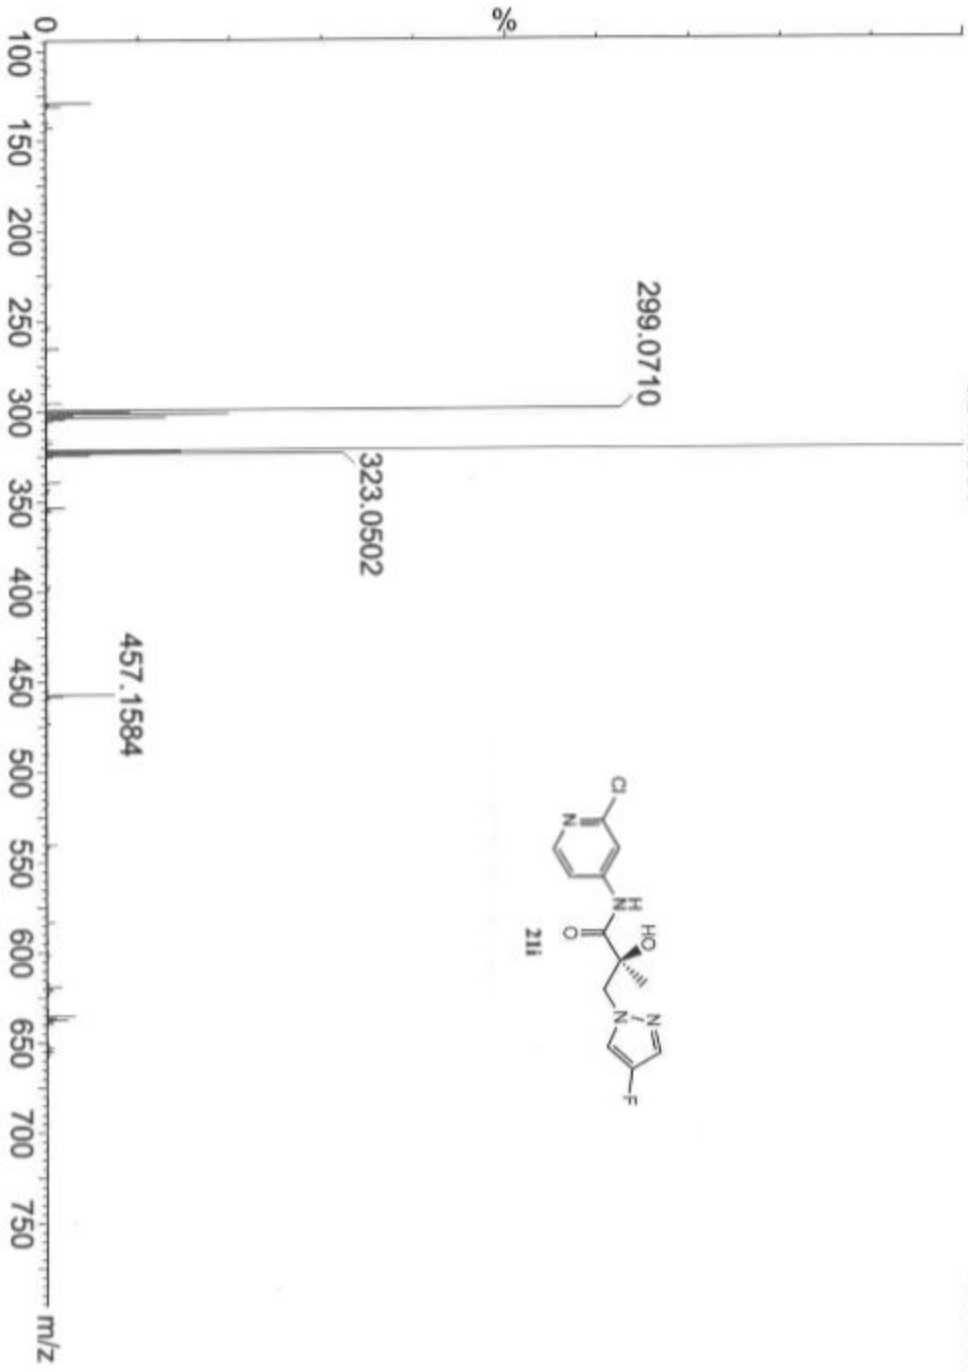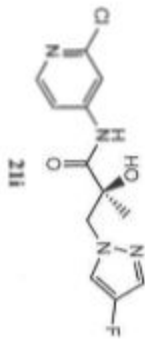

YH-II-261\_20191007\_24

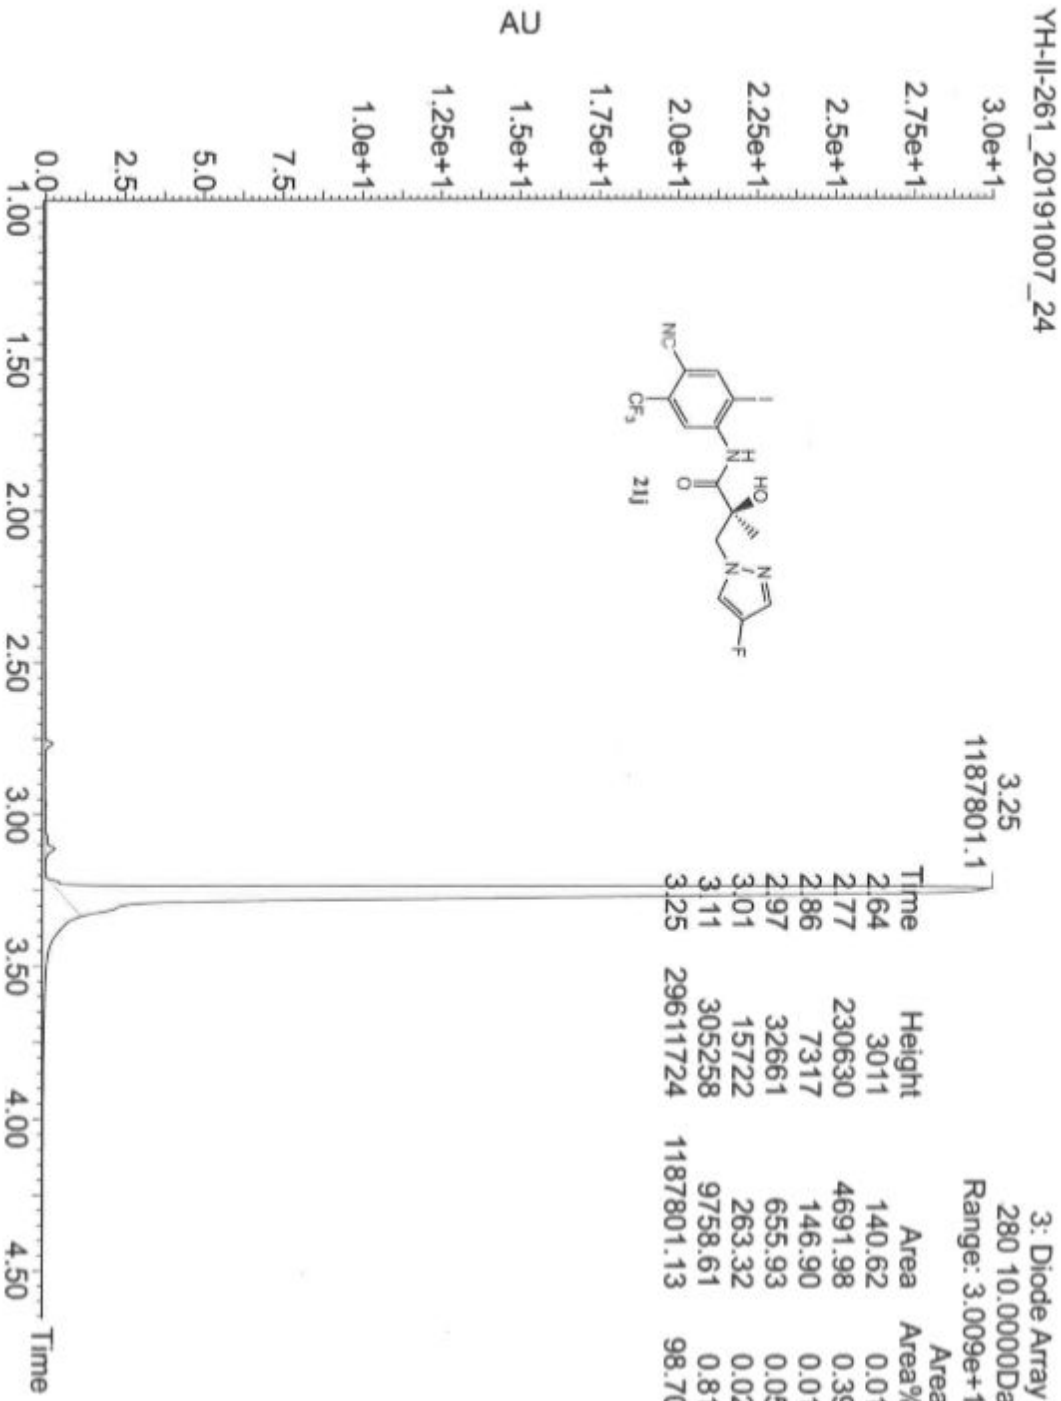

YH-II-261\_20191007\_24 272 (3.304)

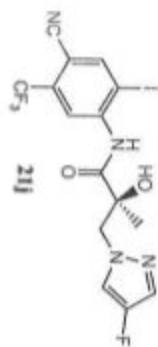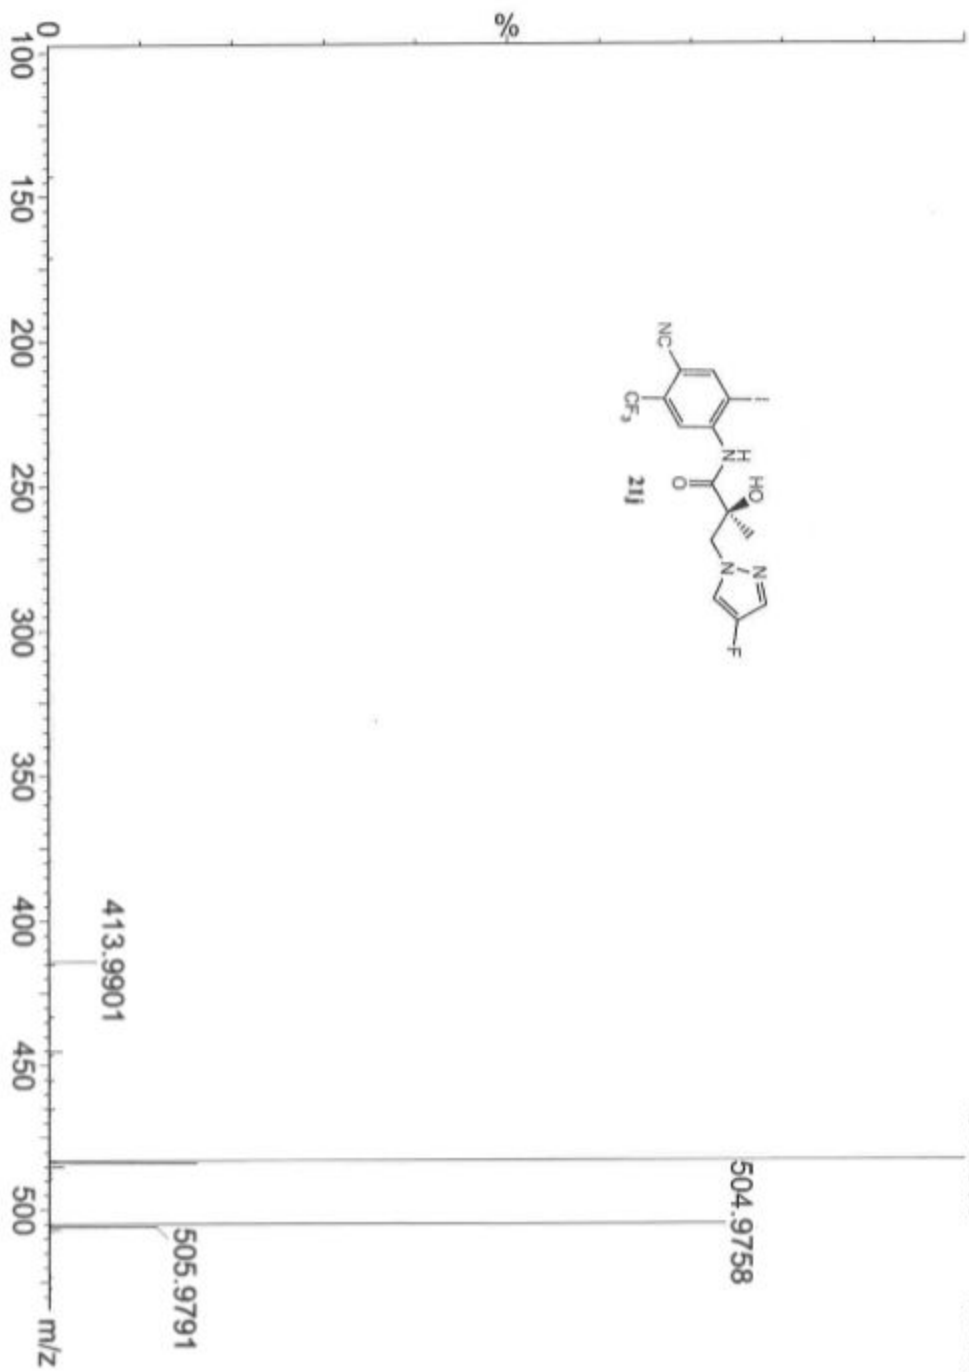

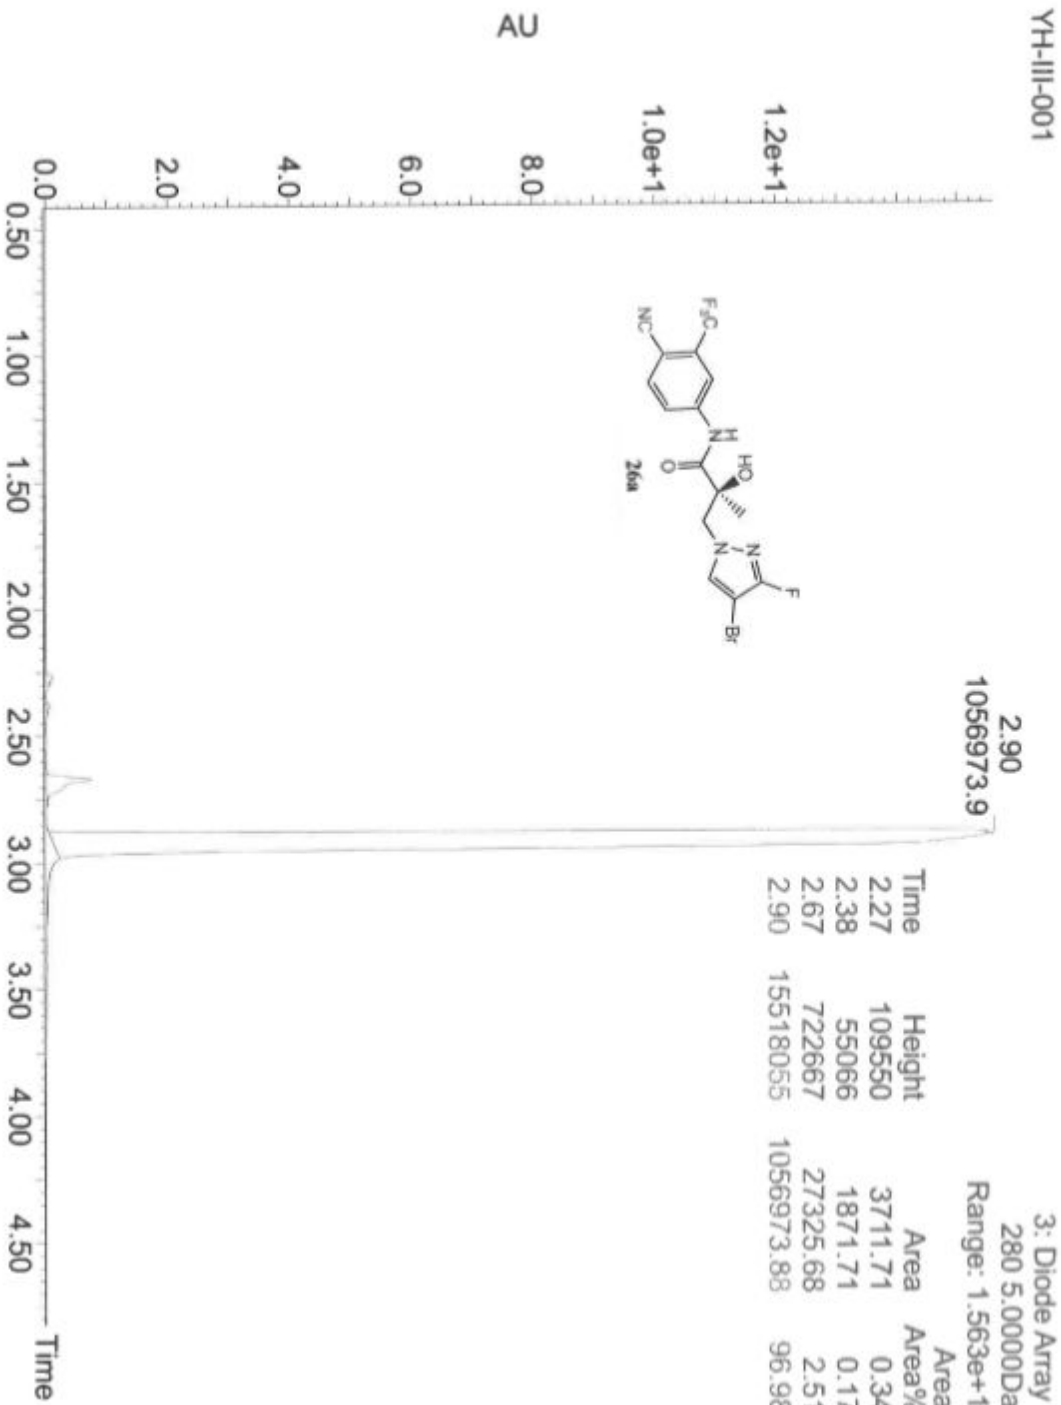

YH-III-001 269 (2.967)

435.0083

1: TOF MS ES+  
8.40e6

IM+H+ C15H12NO2F4Br  
Calc. Mass: 435.0080  
Error: 0.7ppm

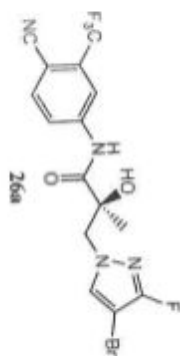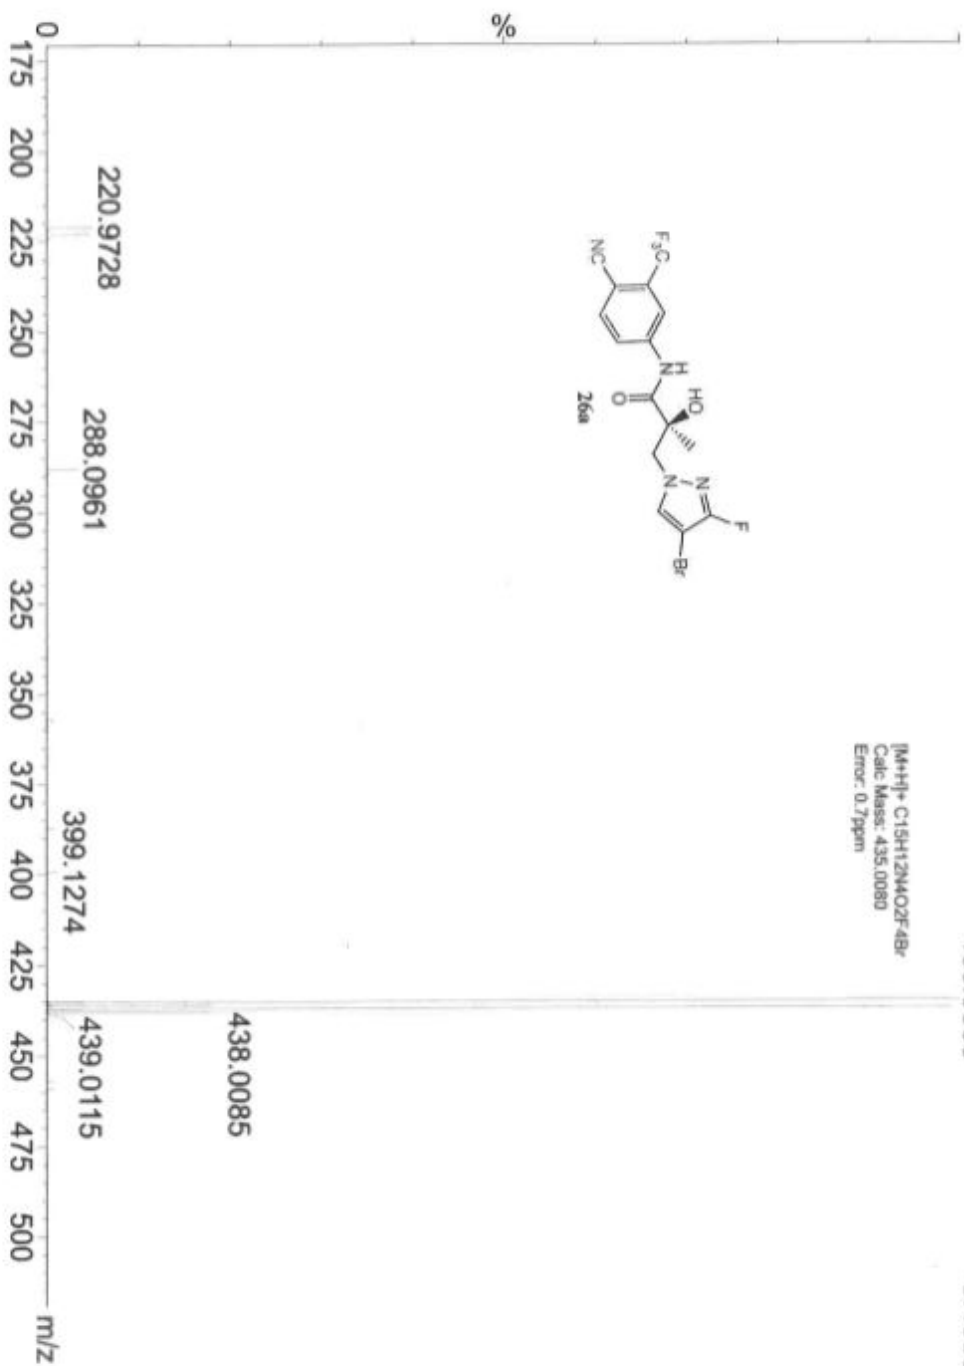



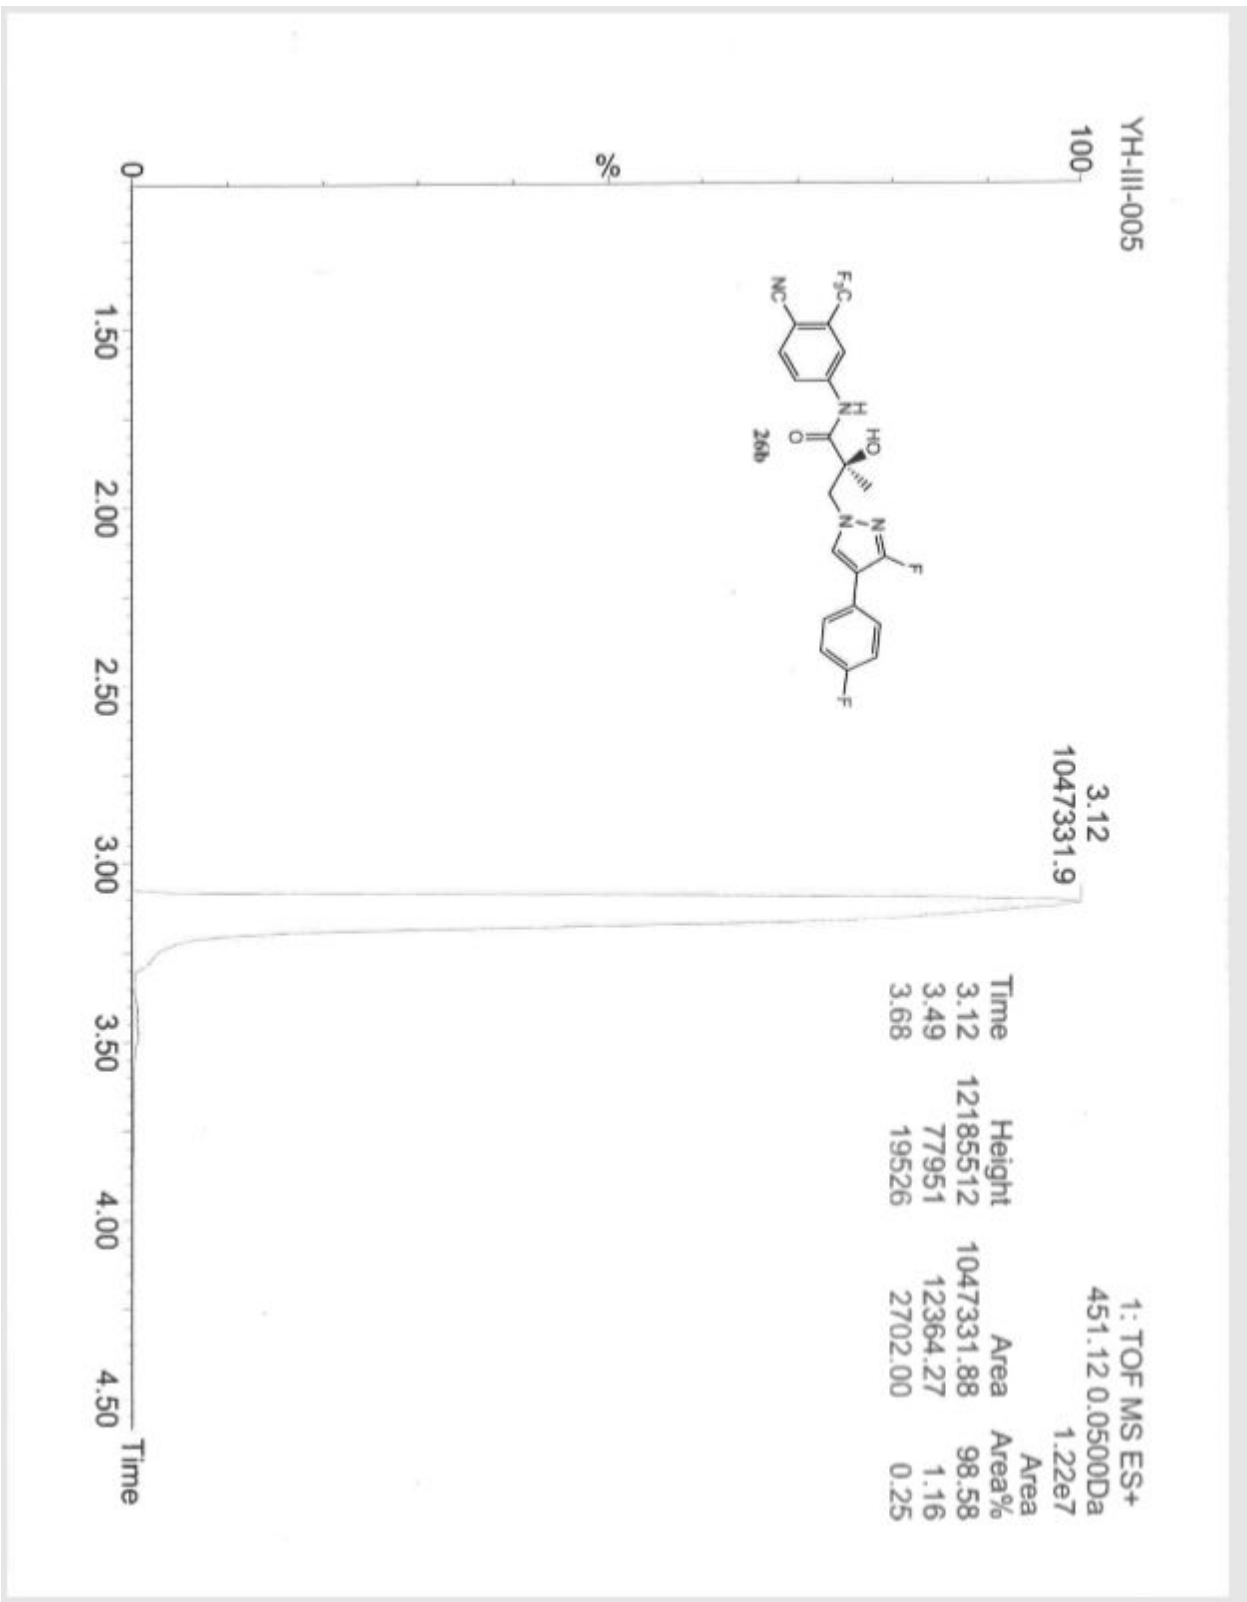

YH-III-005 288 (3.141)

451.1196

1: TOF MS ES+  
1.09e7

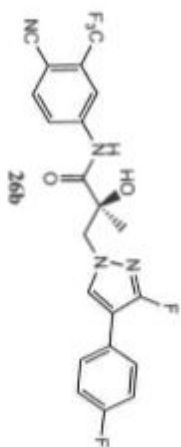

[M+H]<sup>+</sup> C<sub>21</sub>H<sub>18</sub>N<sub>2</sub>O<sub>2</sub>F<sub>5</sub>  
Calc. Mass: 451.1193  
Error: 0.7 ppm

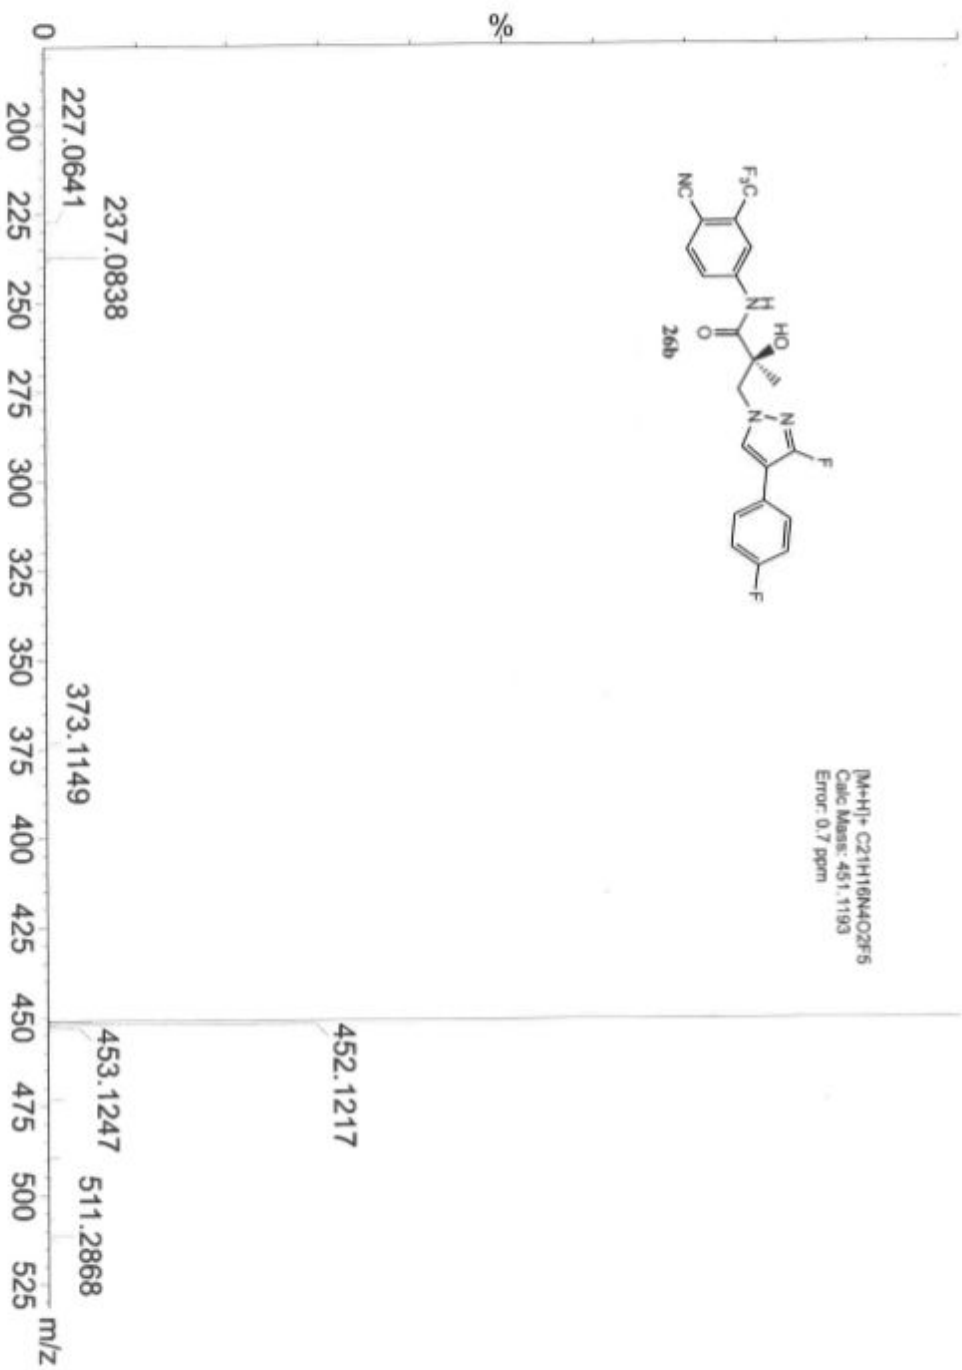

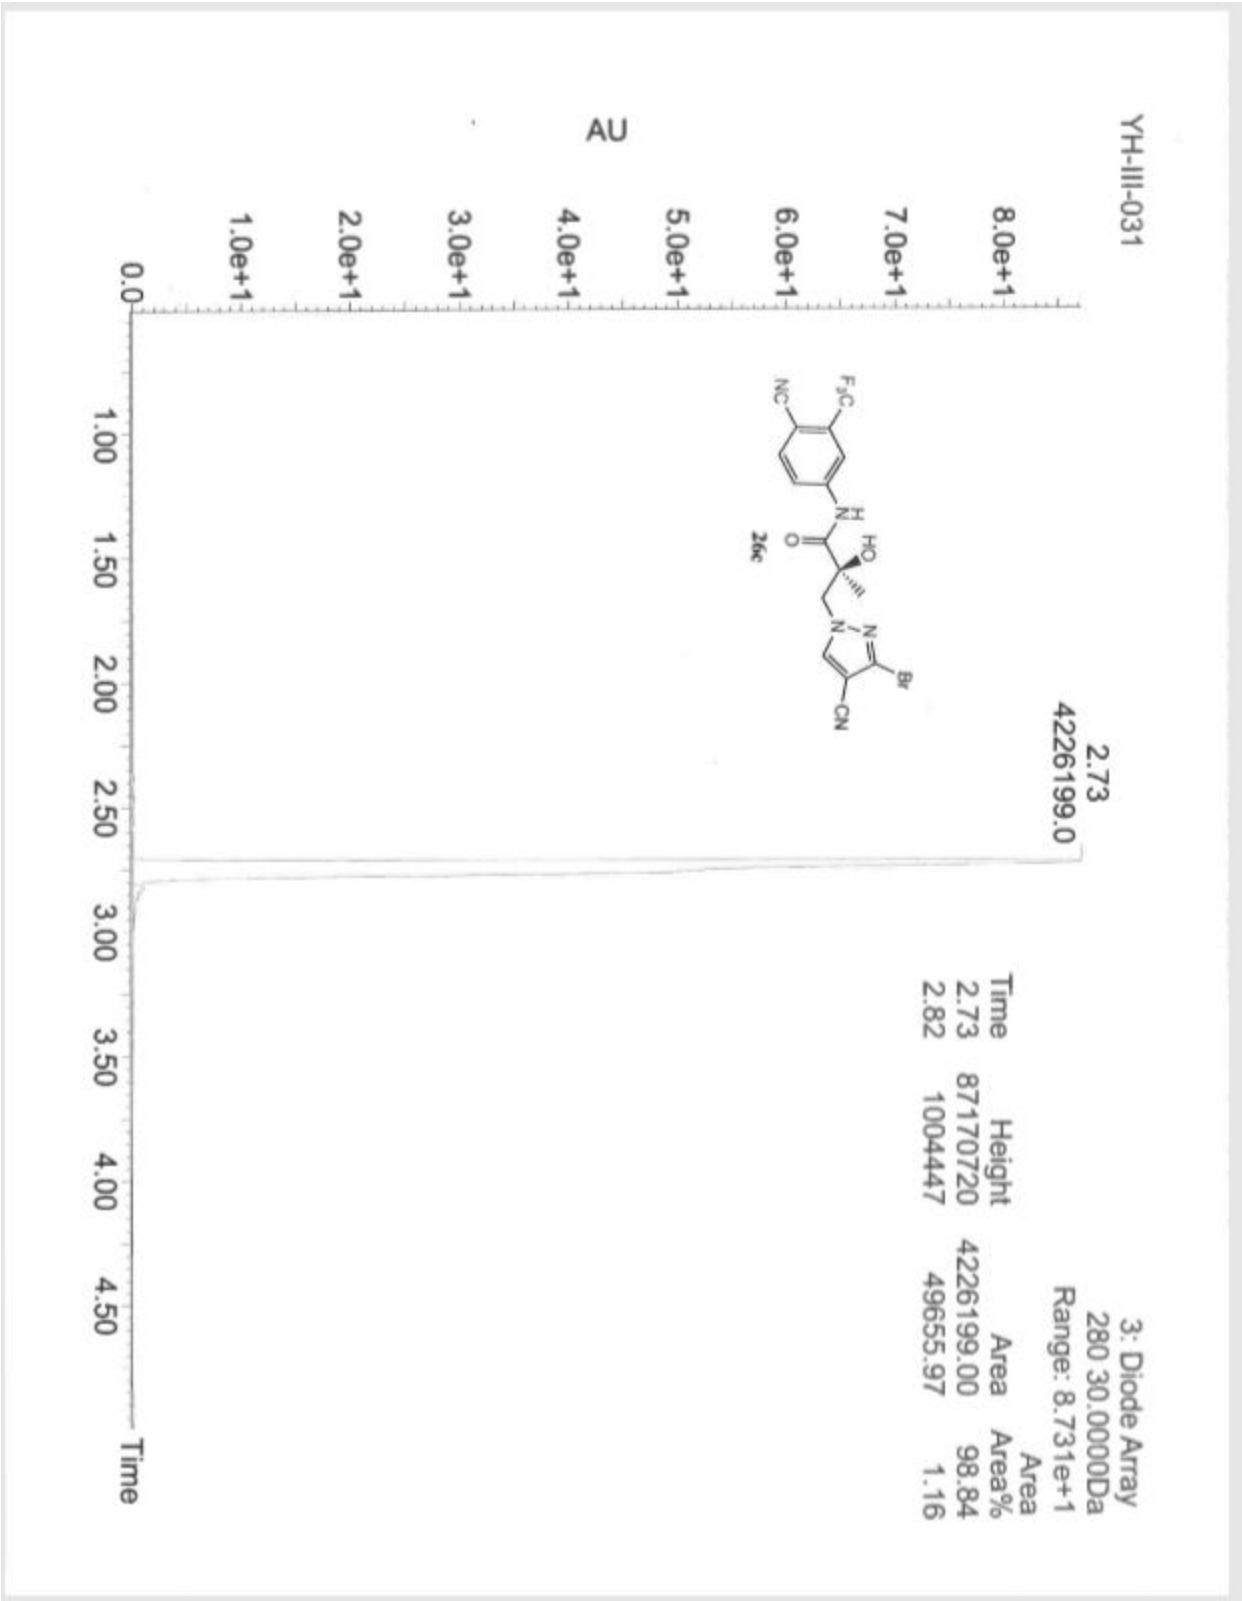

YH-III-031 248 (2.775)

442.0109

1: TOF MS ES+  
3.78e6

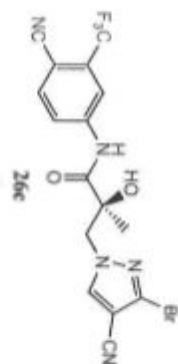

$M+H^+$ : C<sub>16</sub>H<sub>12</sub>N<sub>2</sub>O<sub>2</sub>F<sub>3</sub>Br  
Calc Mass: 442.0126  
Error: -3.8 ppm

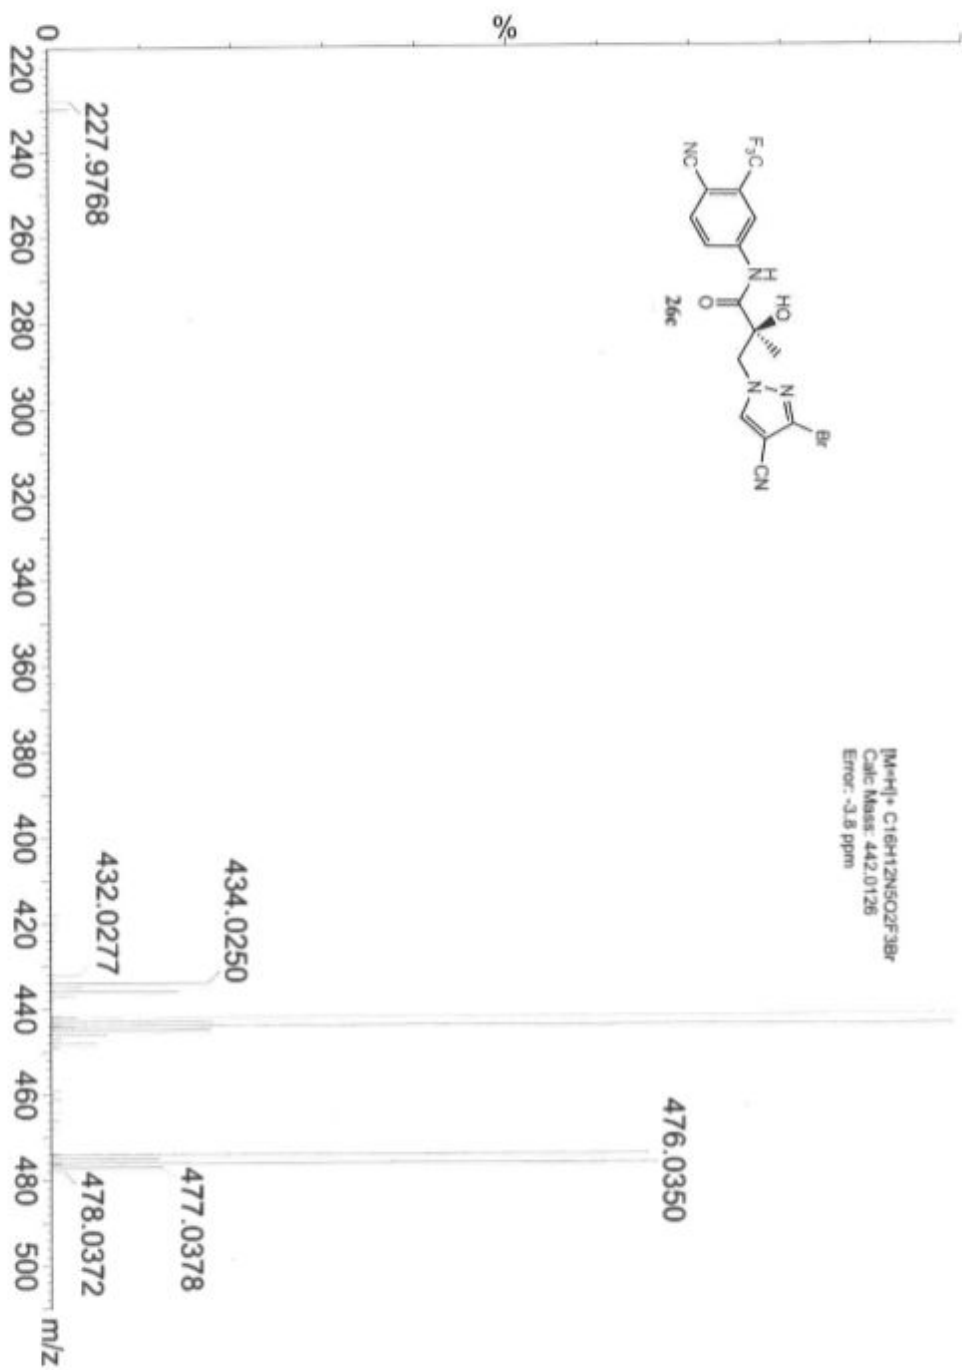

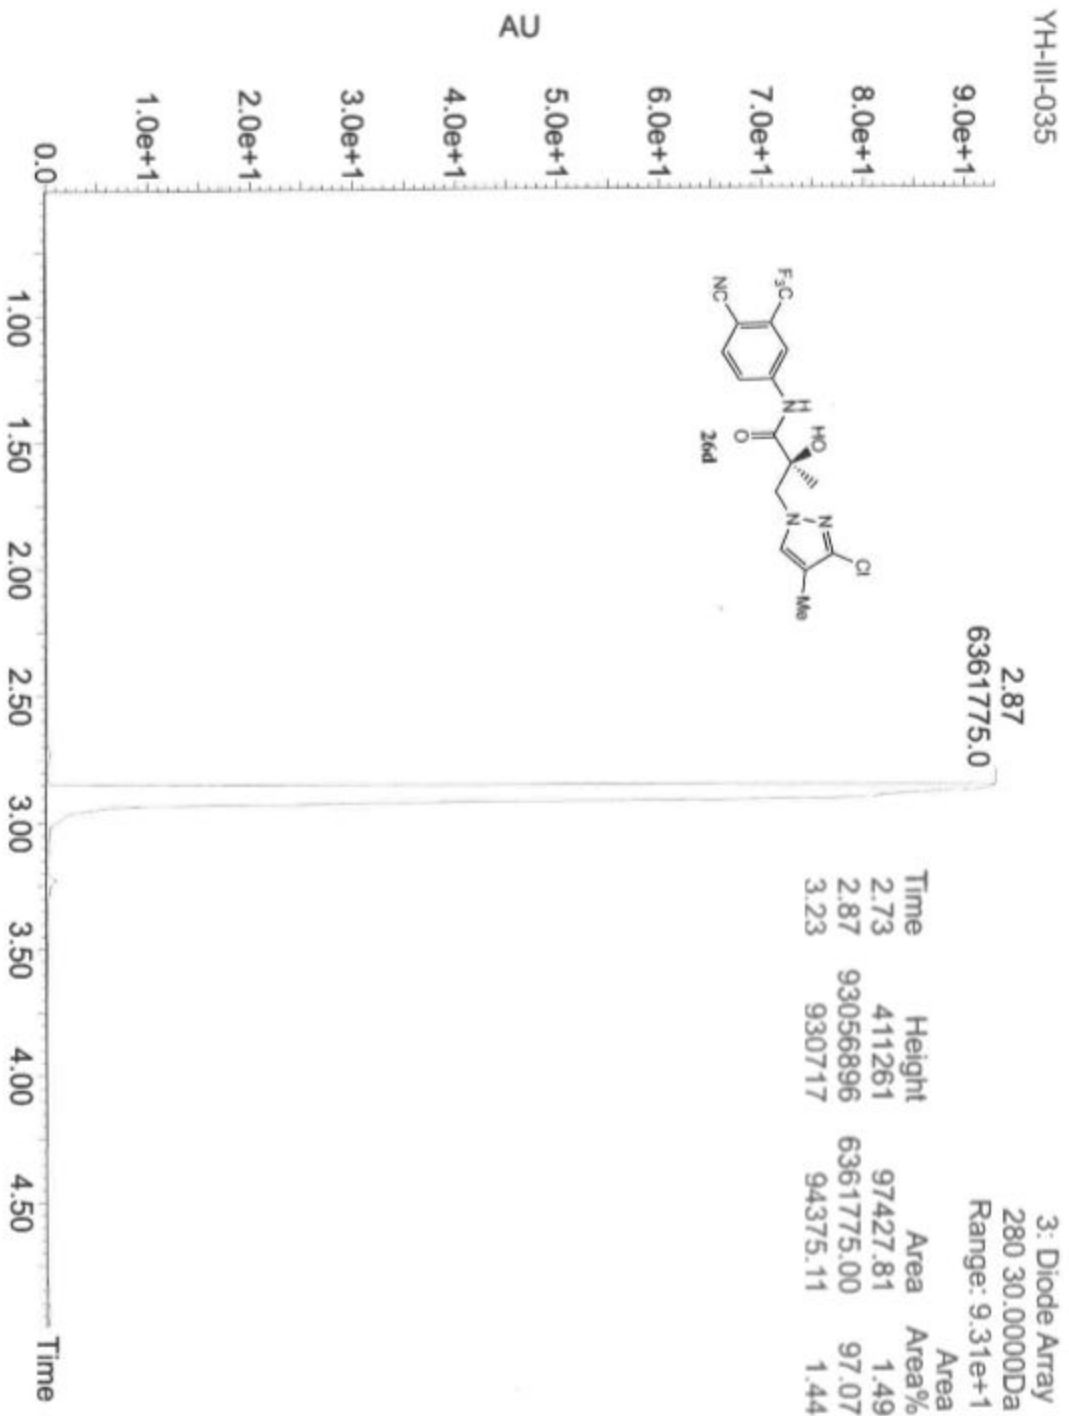

YH-III-035 260 (2.890)

387.0839

1: TOF MS ES+  
1.05e7

[M+H]<sup>+</sup>: C<sub>18</sub>H<sub>15</sub>N<sub>4</sub>O<sub>2</sub>F<sub>3</sub>Cl  
Calc. Mass: 387.0836  
Error: 0.8 ppm

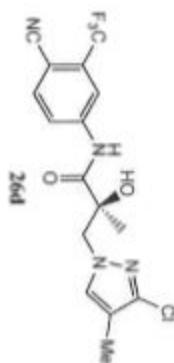

%

0 150 175 200 225 250 275 300 325 350 375 400 425 450 475 m/z

173.0480

389.0803

390.0823

411.0614

YH-IV-017

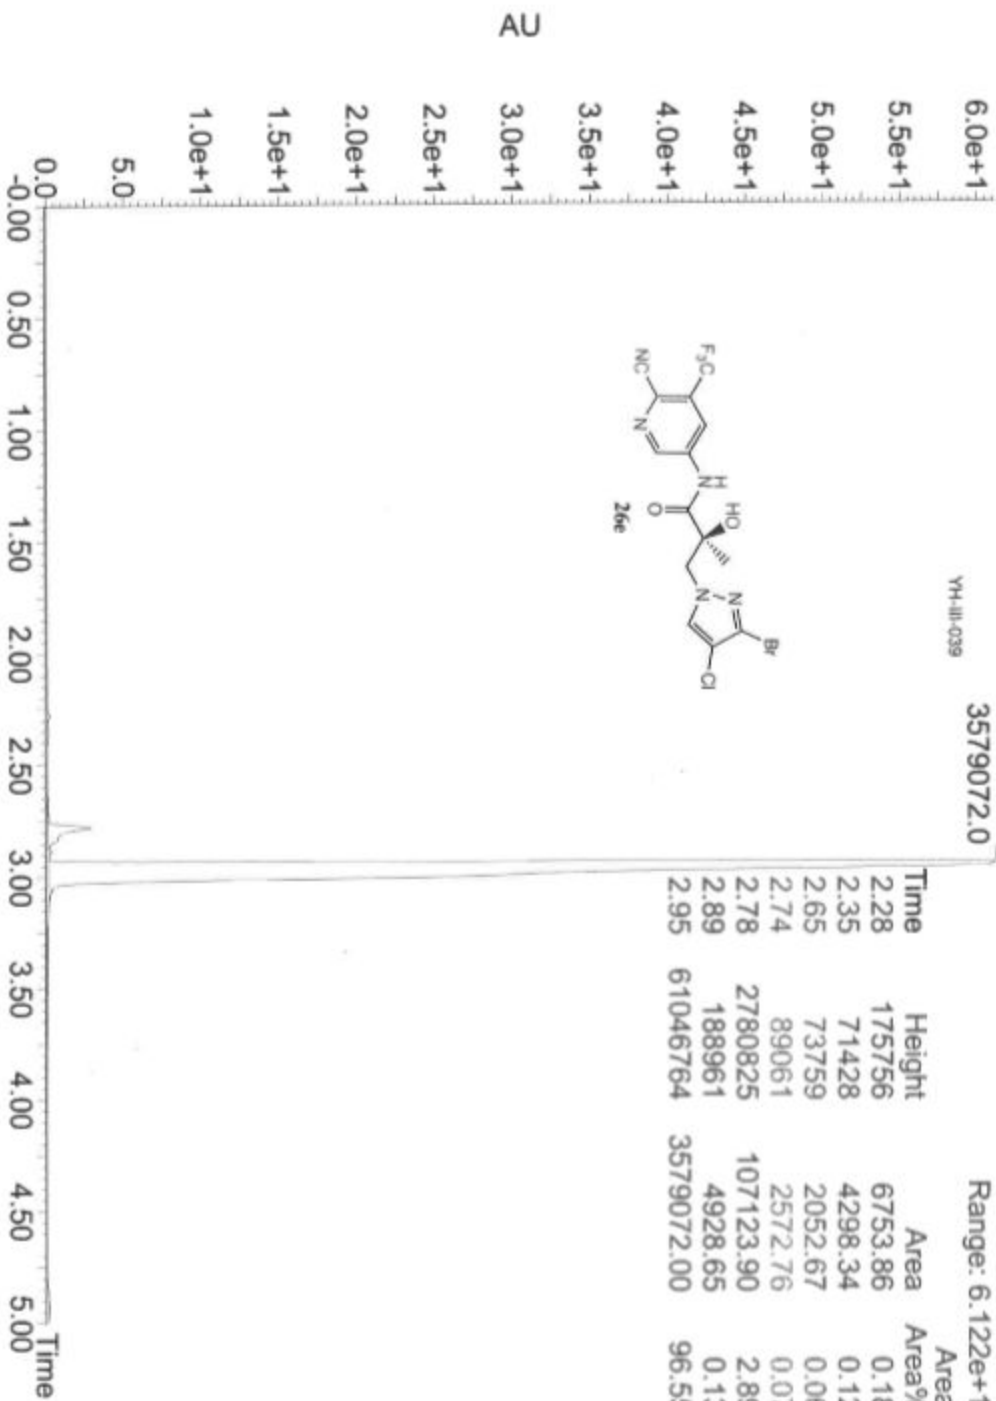

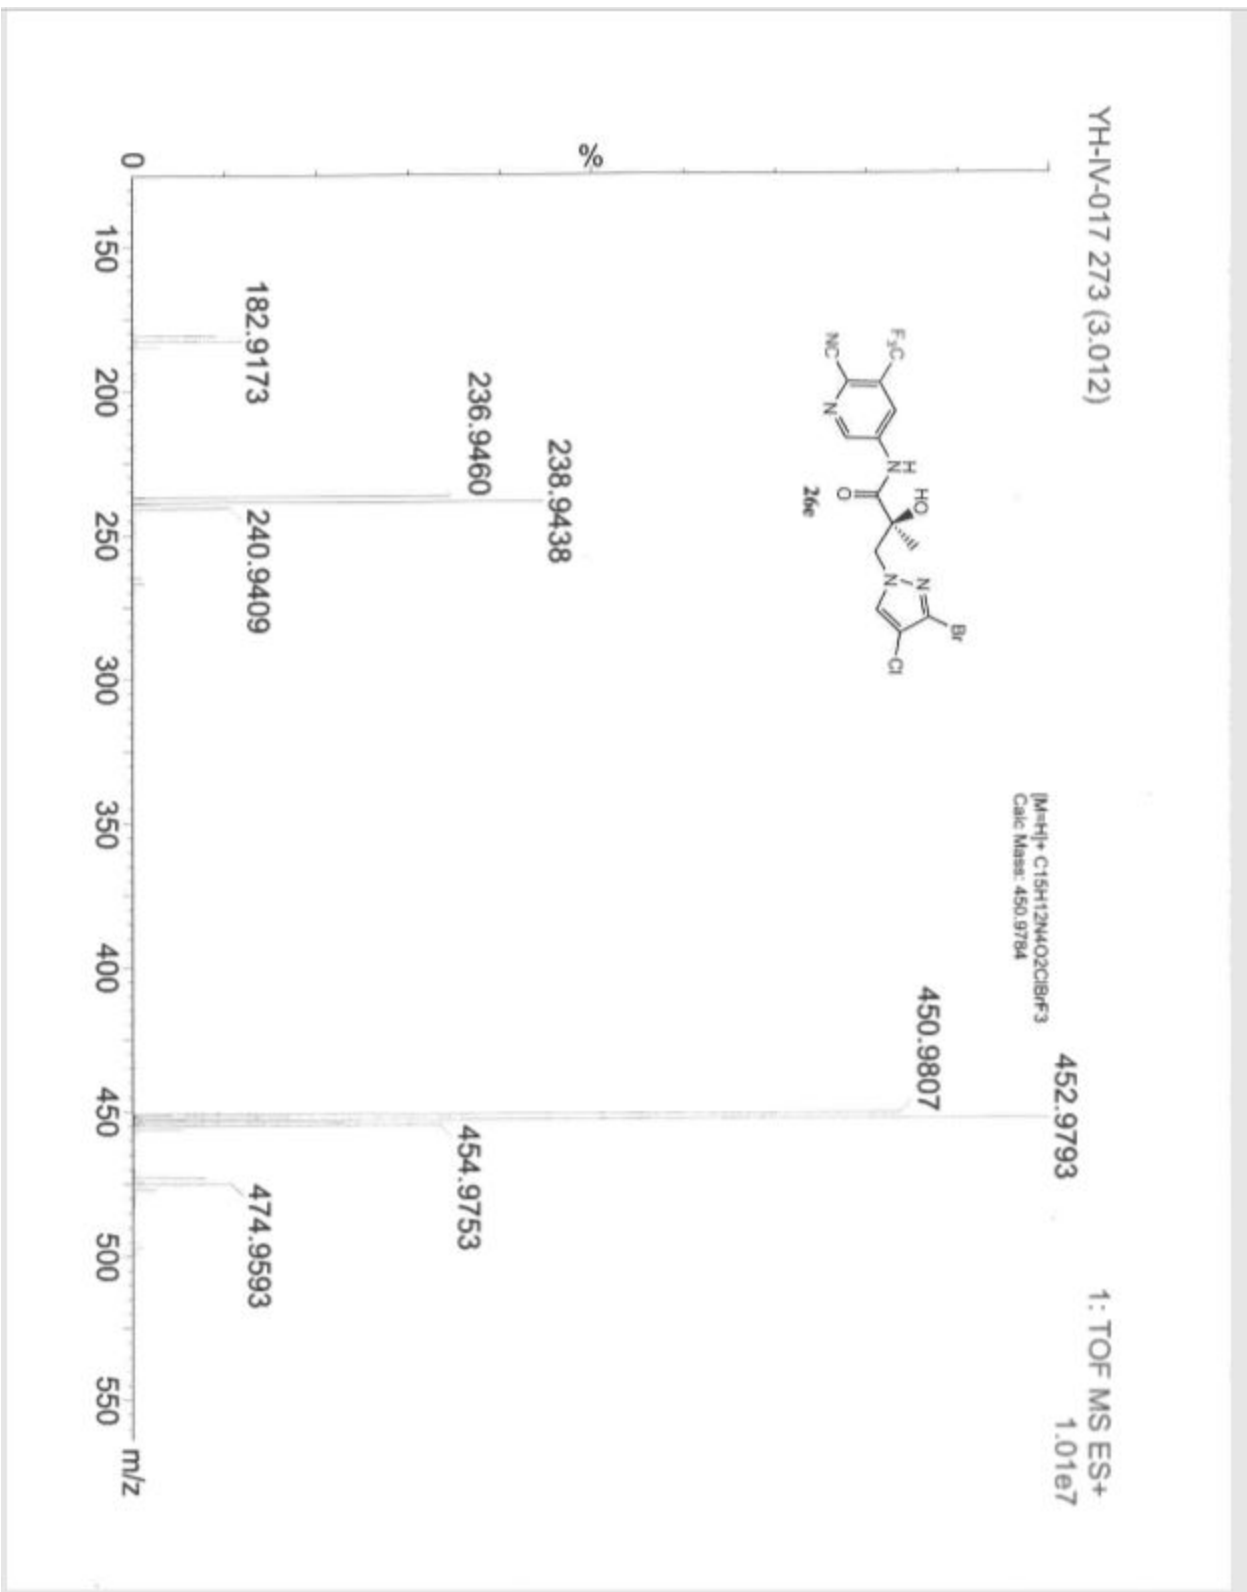



DJ-VI-257\_29a\_20191112\_14

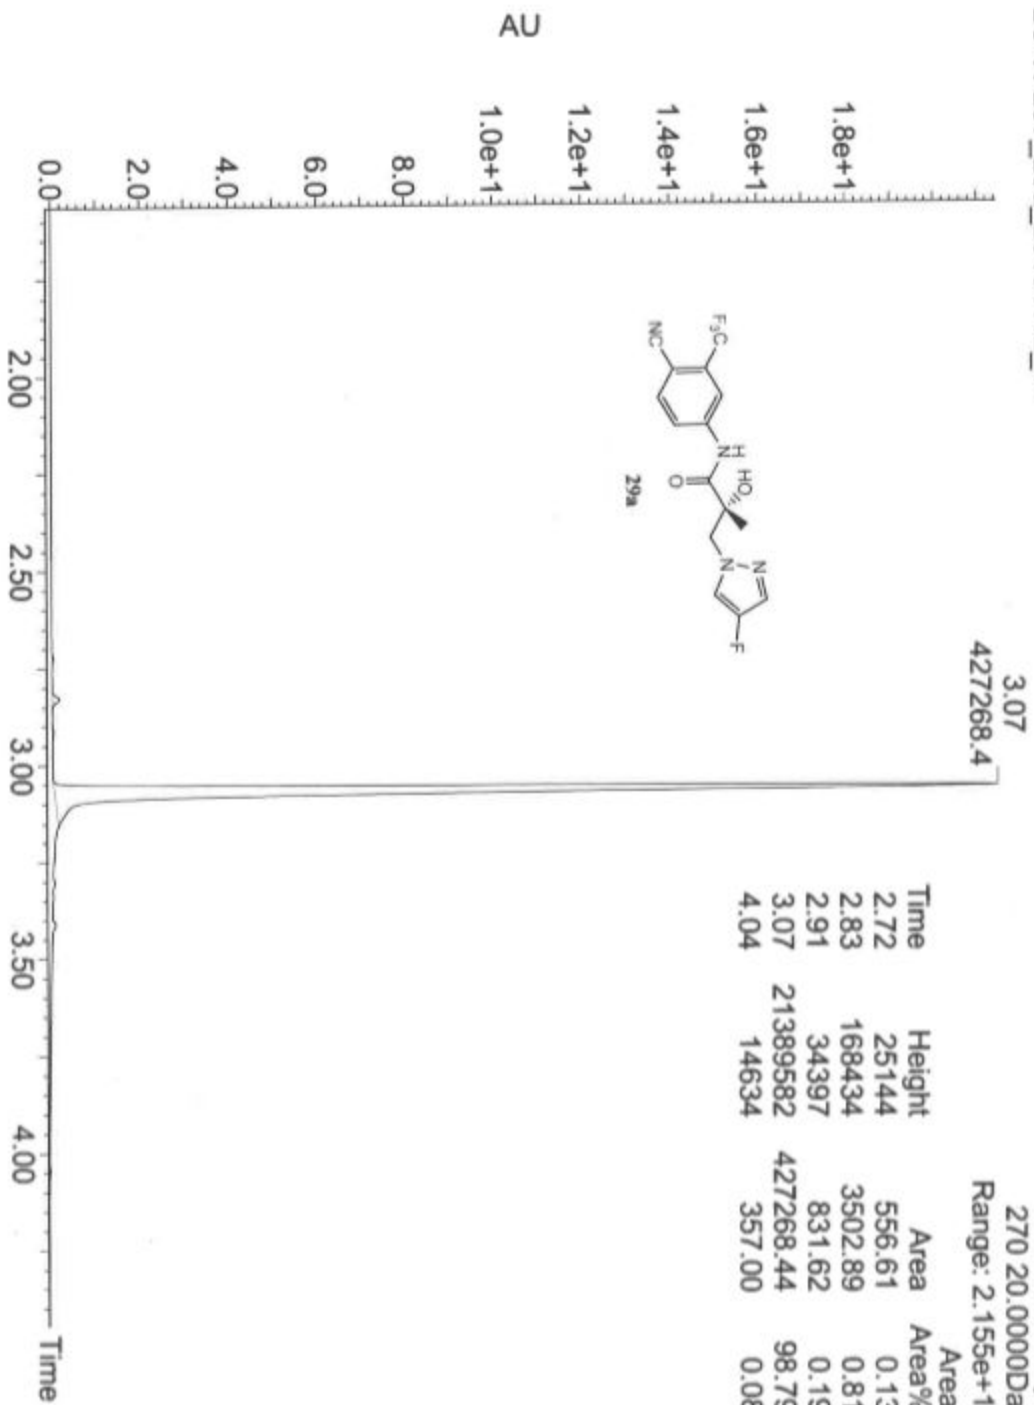

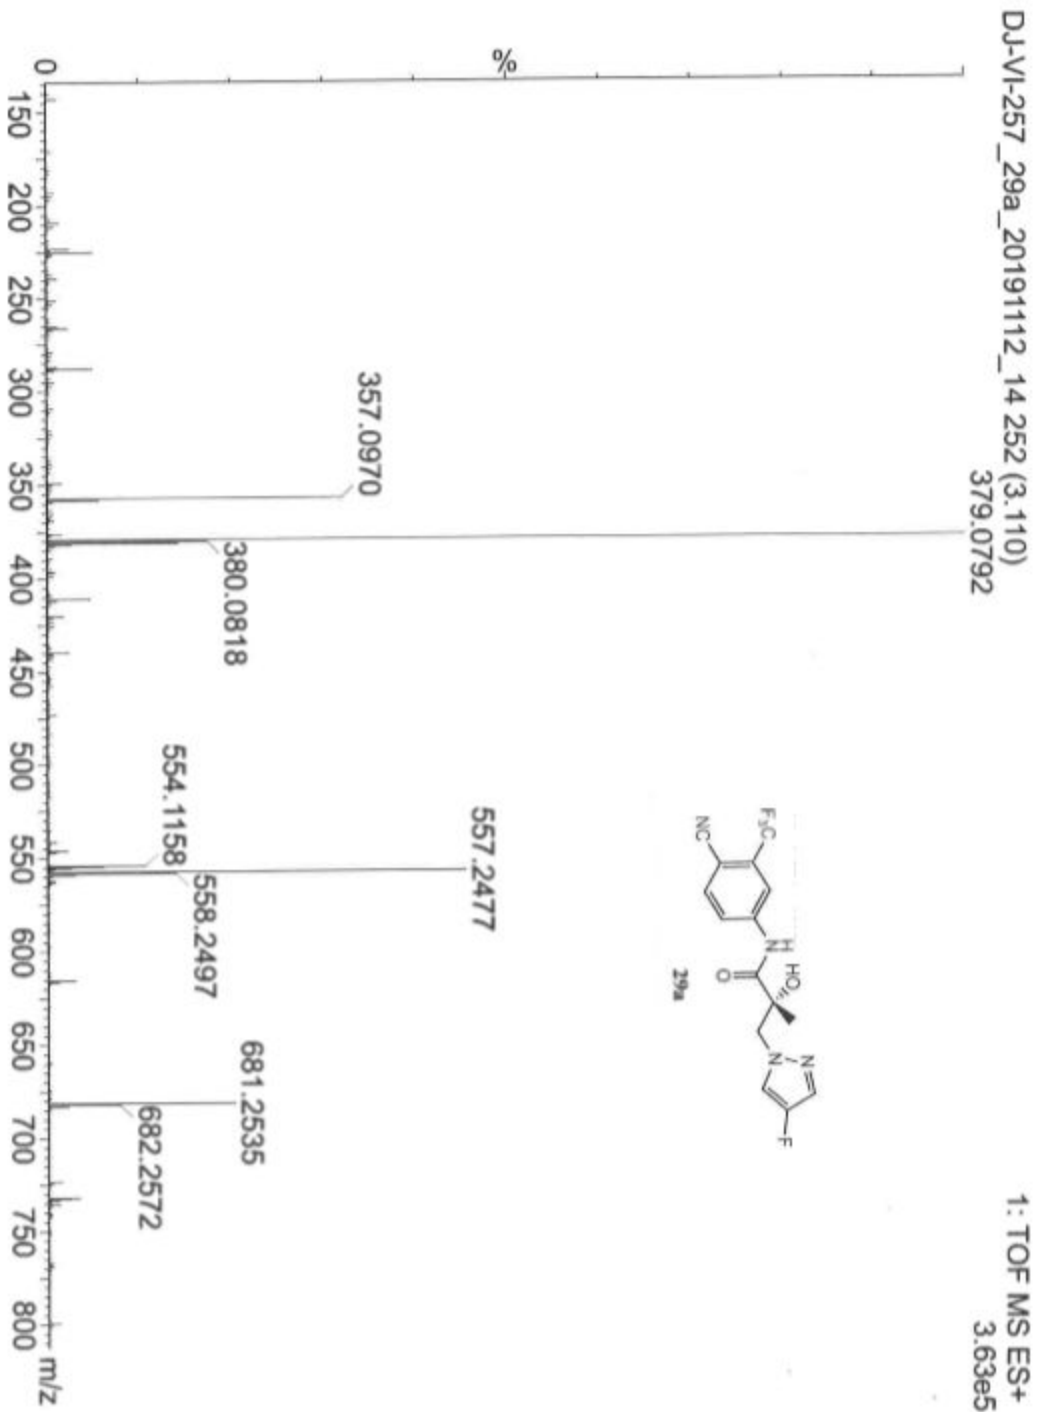

YH-II-143\_20191007\_25

3: Diode Array  
271 10.0000Da  
Range: 1.684e+1

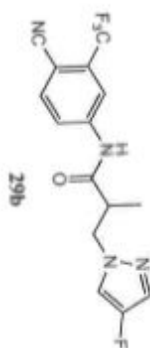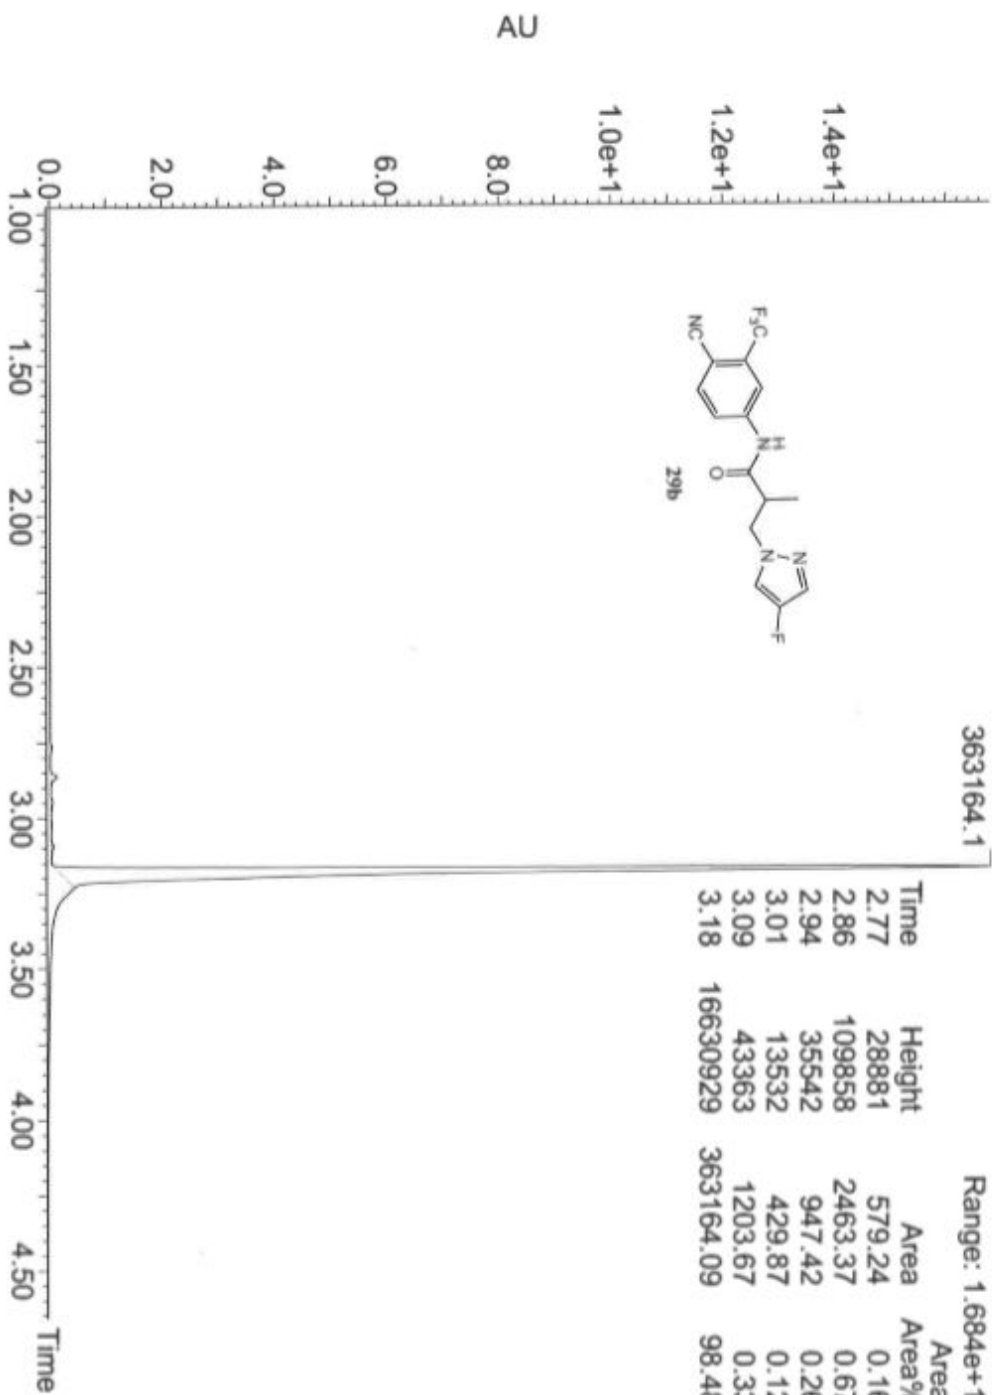

YH-II-143\_20191007\_25 264 (3.224)

1: TOF MS ES+  
1.38e6

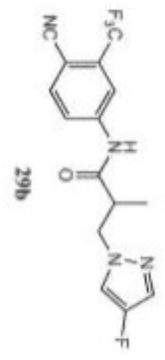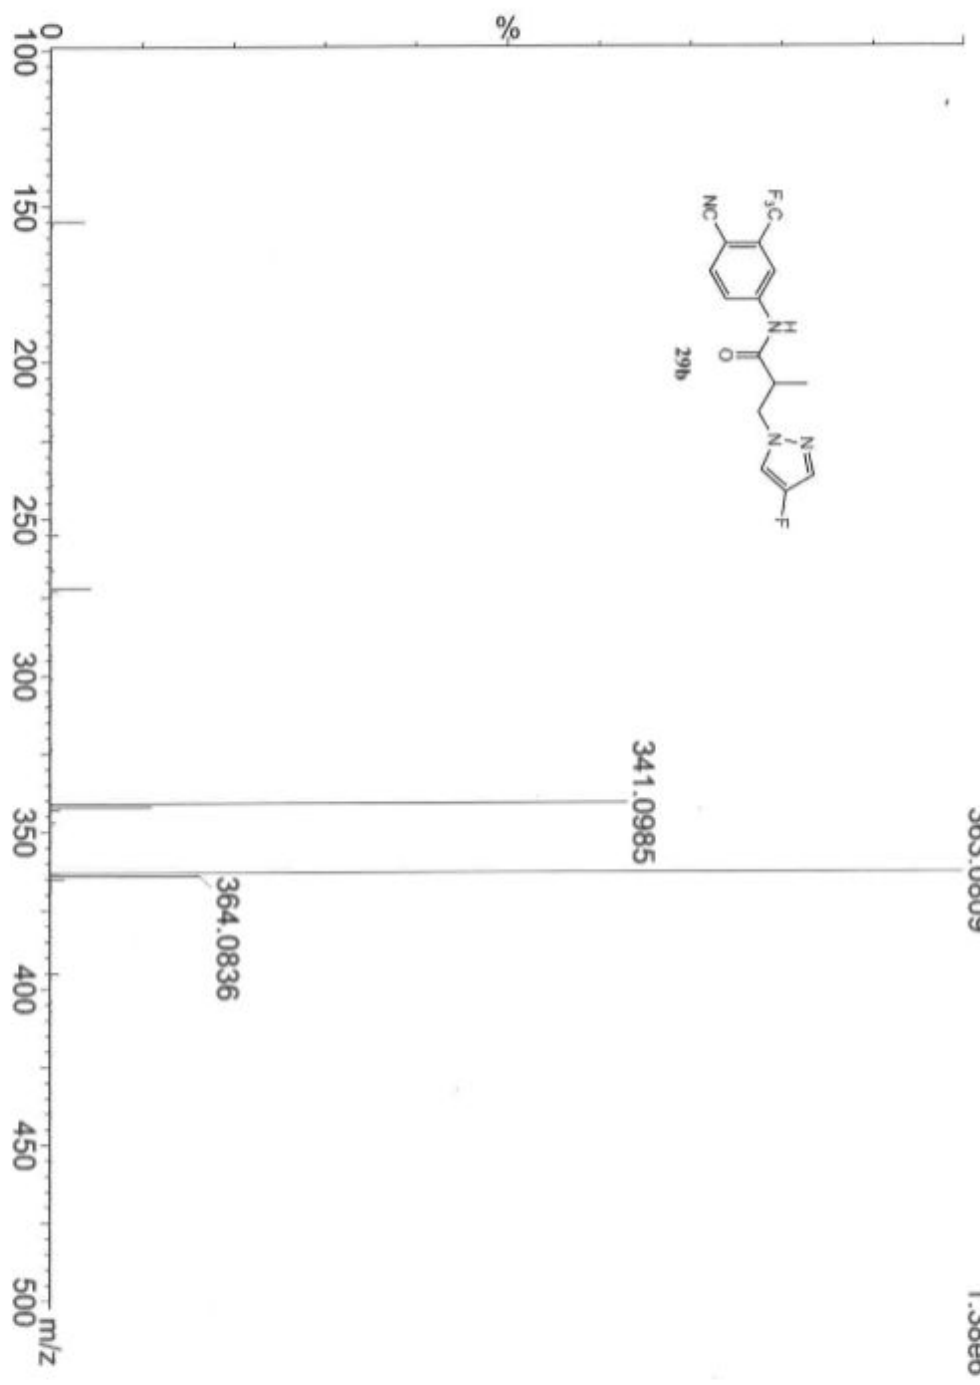

YH-II-179\_20191007\_26

3.13  
979505.4

3: Diode Array  
270 10.0000Da  
Range: 3.042e+1

3.0e+1  
2.75e+1  
2.5e+1  
2.25e+1  
2.0e+1  
1.75e+1  
1.5e+1  
1.25e+1  
1.0e+1  
7.5  
5.0  
2.5

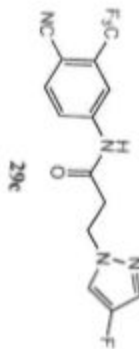

| Time | Height   | Area      | Area% |
|------|----------|-----------|-------|
| 2.77 | 193569   | 3980.40   | 0.40  |
| 2.86 | 262936   | 5695.06   | 0.57  |
| 2.95 | 93681    | 2435.11   | 0.25  |
| 3.02 | 10701    | 199.14    | 0.02  |
| 3.07 | 52131    | 1145.33   | 0.12  |
| 3.13 | 29235906 | 979505.44 | 98.64 |

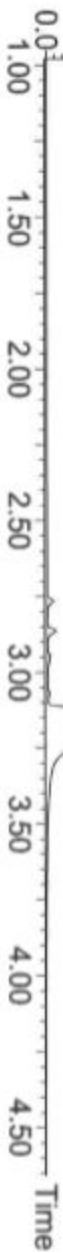

YH-II-179\_20191007\_26 258 (3.172)

1: TOF MS ES+  
1.33e6

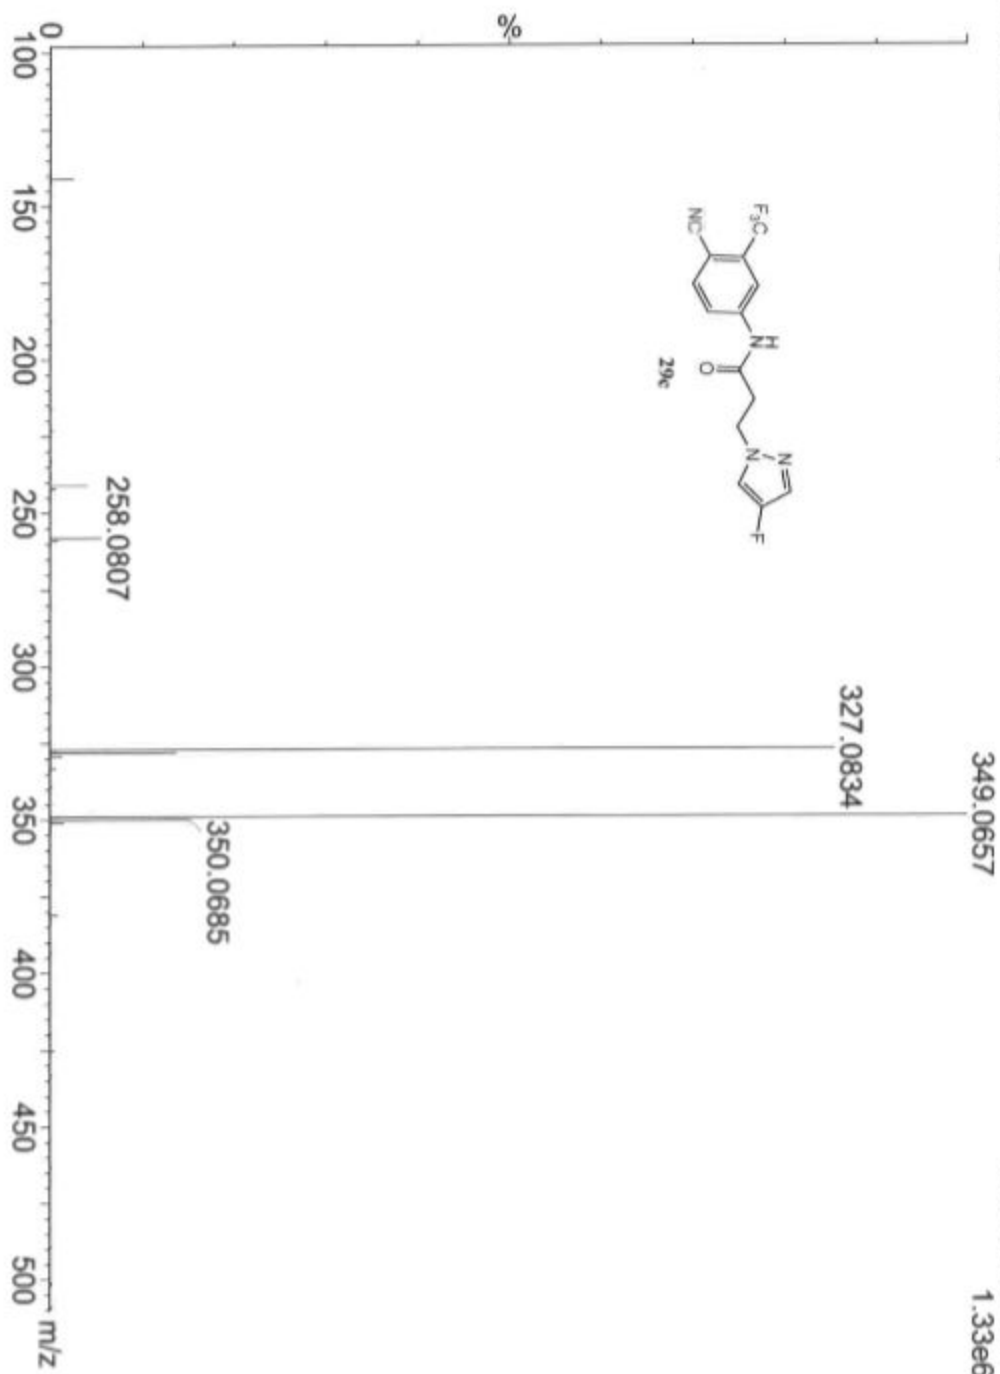

YH-III-173\_20191007\_27

3.08  
603781.0

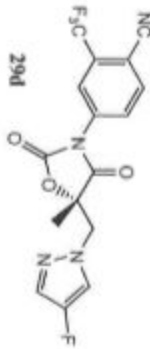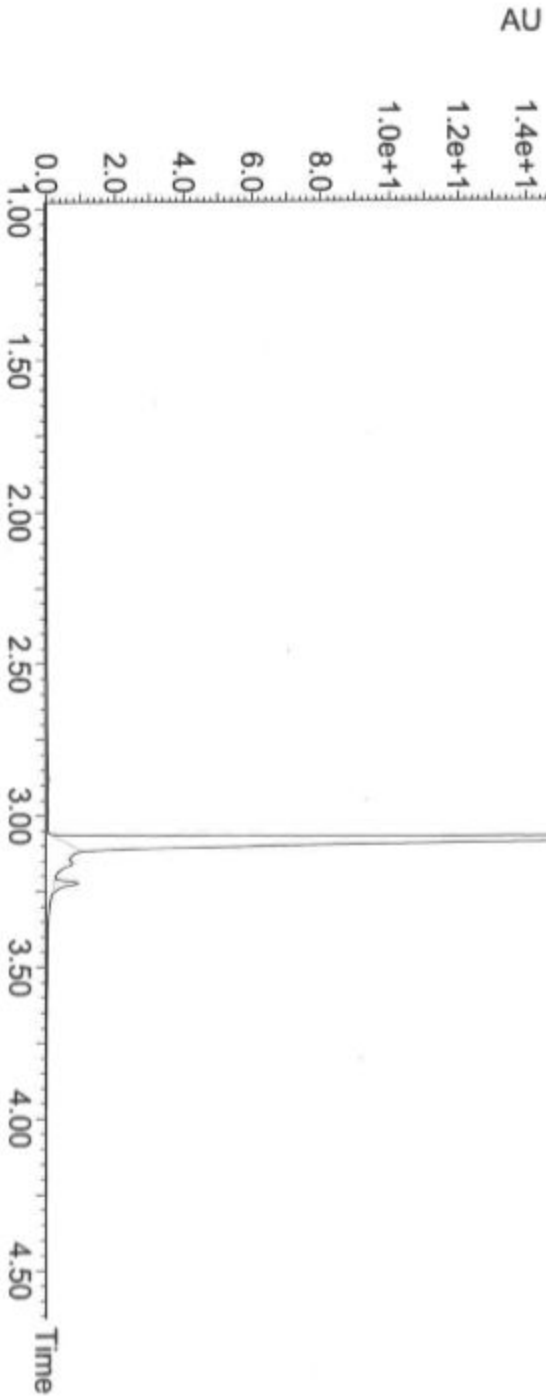

YH-III-173\_20191007\_27 253 (3.129)

383.0740

1: TOF MS ES+  
1.09e6

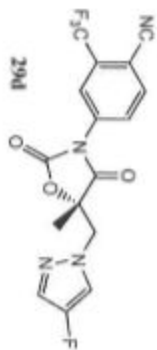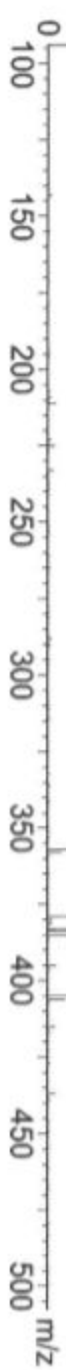



DJ-VII-138\_29f\_20191112\_16

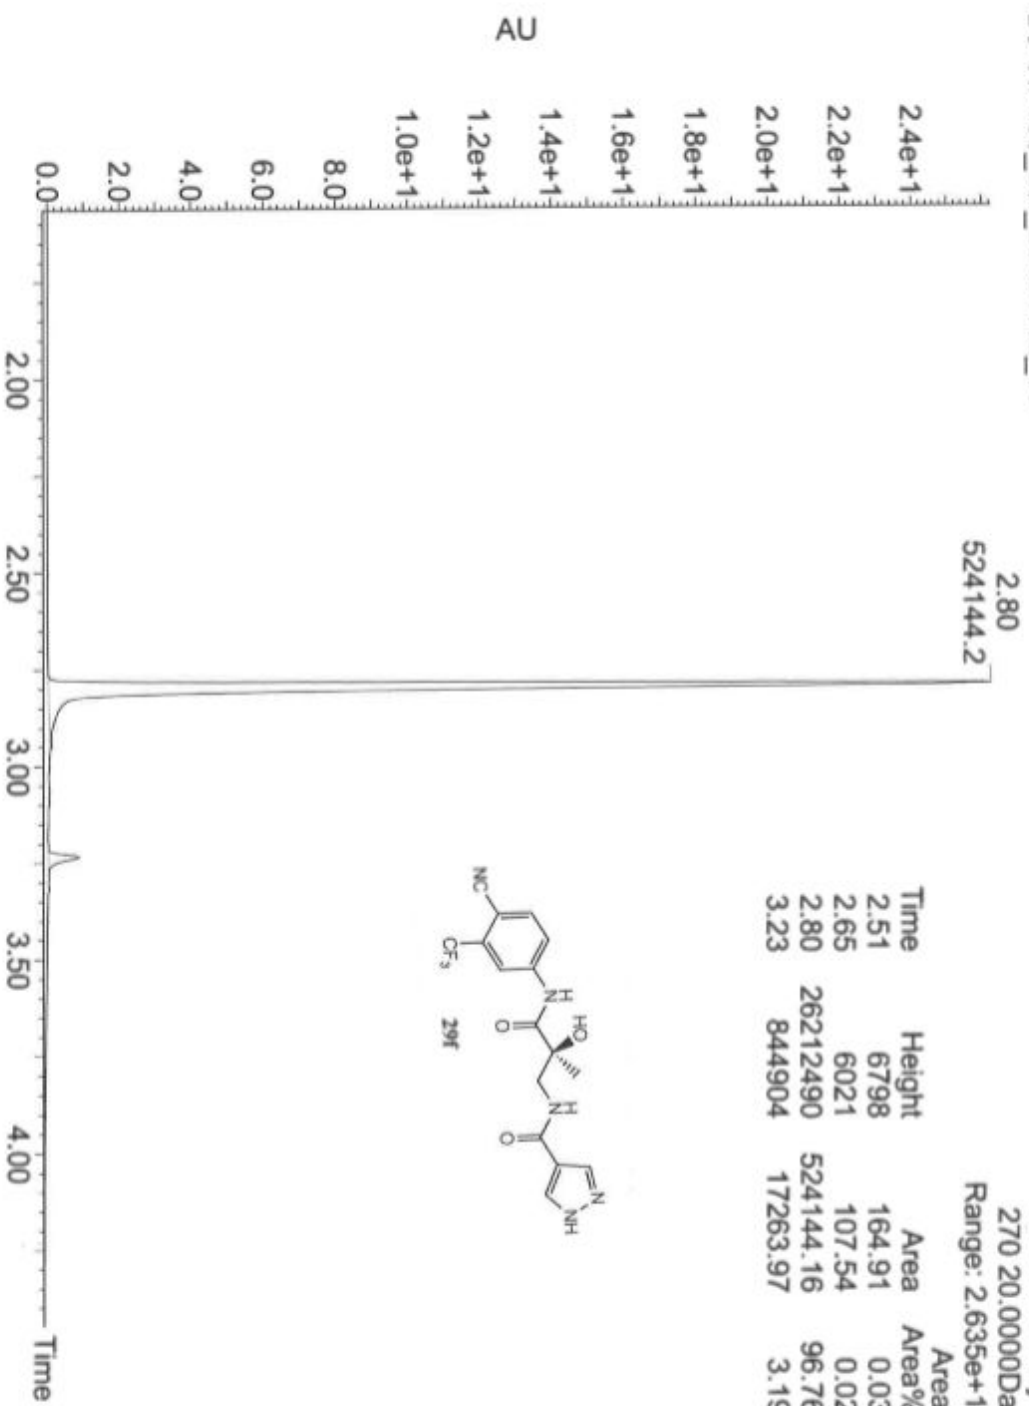

DJ-VII-138\_29f\_20191112\_16 221 (2.832)

404.0945

1: TOF MS ES+  
1.17e6

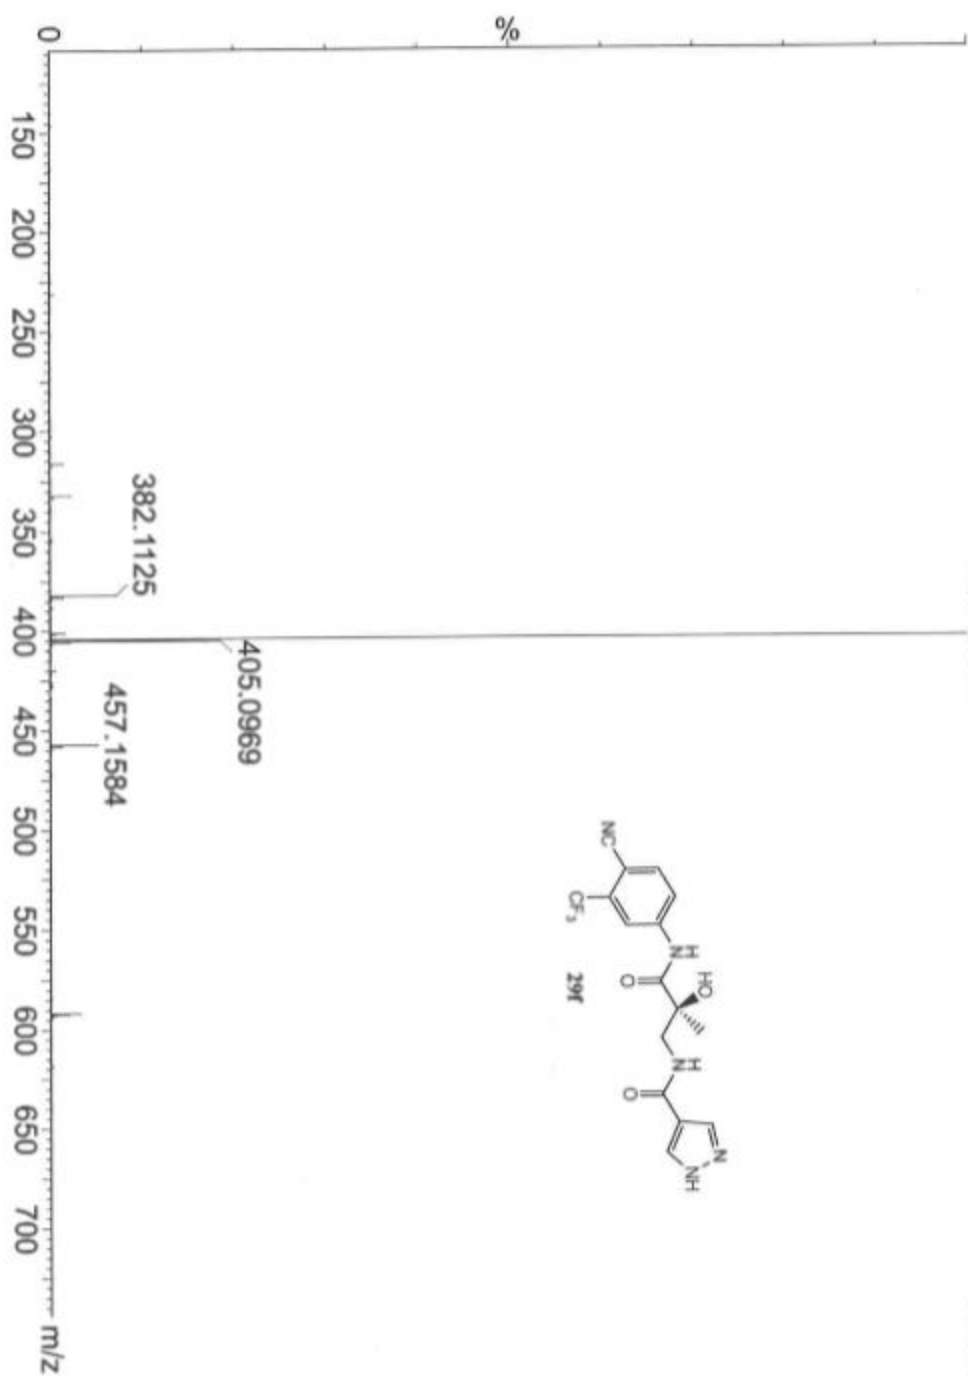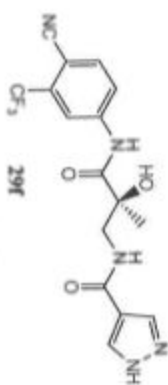

Supplement: NIHMS1646976-supplement-Supporting_information.pdf [file NIHMS1646976-supplement-Supporting_information.pdf]
